# Supplementary material for: An intergenic bidirectional promoter driven novel lncRNA (LjPLR) modulates the gene expression of a late nodulin in Lotus japonicus
Source: Research Square preprint supplement (doi:10.21203/rs.3.rs-7551253/v1), 2025-10-07
Supplement: Supplementary file 1 [file 33a2b52180e3d9fb35c99519.xlsx]

## Sheet: Sheet1
Title of the article
An intergenic bidirectional promoter driven novel lncRNA (LjPLR) modulates the gene expression of a late nodulin in Lotus japonicus
Name of the Journal : Plant Molecular Biology
Authors
Aniruddho Das1 3, Troyee Das2, Zhumur Ghosh2 and Anirban Siddhanta1*
Address
Aniruddho Das
aniruddhodas.biology@ngc.ac.in
Troyee Das
dastroyee1993@gmail.com
Zhumur Ghosh
zhumur@jcbose.ac.in
Anirban Siddhanta
asbioc@caluniv.ac.in
1Department of Biochemistry, University of Calcutta; 35 Ballygunge Circular Road, Kolkata 700019, India
2Department of Biological Sciences, Bose Institute, Unified Academic Campus,
Kolkata 700 091, West Bengal, India
3Department of Botany, Government General Degree College, Narayangarh, Rathipur, West Bengal 721437, India
*Corresponding author

## Sheet: Sheet2
Chr	Start	End	ID	Score	Strand	thickStart	thickEnd	itemRgb	BlockCount	blockSizes (bp)	blockStarts
LjG1.1_chr2	88256964	88258589	NOV.11882.1	0	+	88258589	88258589	0	2	913 (exon1),417 (exon2),	0,1208,
LjG1.1_chloro	80883	81521	NOV.100.1	0	+	81521	81521	0	1	638,	0,
LjG1.1_chr1	11969703	12025492	NOV.1001.1	0	-	12025492	12025492	0	4	14,577,105,18,	0,54650,55311,55771,
LjG1.1_chr1	11969703	12025492	NOV.1001.1	0	-	12025492	12025492	0	4	14,577,105,18,	0,54650,55311,55771,
LjG1.1_chr2	64775450	64776173	NOV.10017.1	0	-	64776173	64776173	0	1	723,	0,
LjG1.1_chr2	64808888	64809275	NOV.10021.1	0	+	64809275	64809275	0	1	387,	0,
LjG1.1_chr2	64979764	65042515	NOV.10033.1	0	+	65042515	65042515	0	2	14,776,	0,61975,
LjG1.1_chr2	65007595	65042545	NOV.10033.2	0	+	65042545	65042545	0	2	17,461,	0,34489,
LjG1.1_chr2	65041772	65042739	NOV.10039.1	0	-	65042739	65042739	0	1	967,	0,
LjG1.1_chr2	65062723	65063940	NOV.10041.1	0	+	65063940	65063940	0	2	151,414,	0,803,
LjG1.1_chr2	65311890	65374011	NOV.10048.8	0	+	65374011	65374011	0	4	401,72,360,18,	0,787,1822,62103,
LjG1.1_chr2	65311898	65368679	NOV.10048.9	0	+	65368679	65368679	0	4	402,72,257,15,	0,779,1814,56766,
LjG1.1_chr2	65306112	65341738	NOV.10051.4	0	-	65341738	65341738	0	2	21,441,	0,35185,
LjG1.1_chr2	65353308	65582365	NOV.10051.7	0	-	65582365	65582365	0	3	54,391,229,	0,223781,228828,
LjG1.1_chr2	65353308	65582365	NOV.10051.7	0	-	65582365	65582365	0	3	54,391,229,	0,223781,228828,
LjG1.1_chr1	12006810	12007379	NOV.1006.1	0	-	12007379	12007379	0	1	569,	0,
LjG1.1_chr2	65728250	65728825	NOV.10068.2	0	-	65728825	65728825	0	2	364,166,	0,409,
LjG1.1_chr2	65728270	65729451	NOV.10068.3	0	-	65729451	65729451	0	2	602,102,	0,1079,
LjG1.1_chr2	66137571	66197562	NOV.10104.2	0	-	66197562	66197562	0	2	233,14,	0,59977,
LjG1.1_chr2	66137589	66177298	NOV.10104.5	0	-	66177298	66177298	0	2	215,14,	0,39695,
LjG1.1_chr1	12072839	12074661	NOV.1011.1	0	-	12074661	12074661	0	4	406,60,115,179,	0,484,1301,1643,
LjG1.1_chr2	66429623	66429935	NOV.10116.1	0	+	66429935	66429935	0	1	312,	0,
LjG1.1_chr2	66505081	66516315	NOV.10119.1	0	-	66516315	66516315	0	2	13,577,	0,10657,
LjG1.1_chr1	12095376	12095792	NOV.1013.2	0	-	12095792	12095792	0	2	95,213,	0,203,
LjG1.1_chr1	12098267	12099397	NOV.1014.1	0	-	12099397	12099397	0	1	1130,	0,
LjG1.1_chr1	12110868	12113552	NOV.1015.1	0	-	12113552	12113552	0	5	492,83,78,115,179,	0,1167,1328,2163,2505,
LjG1.1_chr2	67706442	67707105	NOV.10183.1	0	+	67707105	67707105	0	1	663,	0,
LjG1.1_chr2	68161220	68161432	NOV.10209.1	0	-	68161432	68161432	0	1	212,	0,
LjG1.1_chr1	12294823	12296643	NOV.1022.1	0	-	12296643	12296643	0	2	312,90,	0,1730,
LjG1.1_chr1	12294837	12296685	NOV.1022.2	0	-	12296685	12296685	0	2	256,115,	0,1733,
LjG1.1_chr1	12294837	12296685	NOV.1022.3	0	-	12296685	12296685	0	2	265,106,	0,1742,
LjG1.1_chr1	12294886	12296657	NOV.1022.4	0	-	12296657	12296657	0	2	215,85,	0,1686,
LjG1.1_chr1	12294890	12296657	NOV.1022.5	0	-	12296657	12296657	0	2	210,89,	0,1678,
LjG1.1_chr2	68369116	68369660	NOV.10225.1	0	-	68369660	68369660	0	1	544,	0,
LjG1.1_chr2	68371519	68372472	NOV.10227.1	0	-	68372472	68372472	0	1	953,	0,
LjG1.1_chr2	68553000	68553226	NOV.10238.1	0	-	68553226	68553226	0	1	226,	0,
LjG1.1_chr2	68814705	68830711	NOV.10257.2	0	+	68830711	68830711	0	2	174,358,	0,15648,
LjG1.1_chr2	68814705	68830711	NOV.10257.2	0	+	68830711	68830711	0	2	174,358,	0,15648,
LjG1.1_chr2	68815423	68816082	NOV.10258.1	0	-	68816082	68816082	0	1	659,	0,
LjG1.1_chr2	69030545	69030765	NOV.10270.1	0	+	69030765	69030765	0	1	220,	0,
LjG1.1_chr2	69211481	69211741	NOV.10293.1	0	-	69211741	69211741	0	1	260,	0,
LjG1.1_chr2	69320737	69576498	NOV.10305.1	0	-	69576498	69576498	0	4	18,265,260,20,	0,62511,64269,255741,
LjG1.1_chr2	69320737	69576498	NOV.10305.1	0	-	69576498	69576498	0	4	18,265,260,20,	0,62511,64269,255741,
LjG1.1_chr2	69320737	69576498	NOV.10305.1	0	-	69576498	69576498	0	4	18,265,260,20,	0,62511,64269,255741,
LjG1.1_chr2	69320737	69576498	NOV.10305.1	0	-	69576498	69576498	0	4	18,265,260,20,	0,62511,64269,255741,
LjG1.1_chr2	69320737	69576498	NOV.10305.1	0	-	69576498	69576498	0	4	18,265,260,20,	0,62511,64269,255741,
LjG1.1_chr2	69320737	69576498	NOV.10305.1	0	-	69576498	69576498	0	4	18,265,260,20,	0,62511,64269,255741,
LjG1.1_chr2	69320737	69576498	NOV.10305.1	0	-	69576498	69576498	0	4	18,265,260,20,	0,62511,64269,255741,
LjG1.1_chr2	69320737	69576498	NOV.10305.1	0	-	69576498	69576498	0	4	18,265,260,20,	0,62511,64269,255741,
LjG1.1_chr2	69383241	69387622	NOV.10305.2	0	-	69387622	69387622	0	3	272,253,11,	0,1765,4370,
LjG1.1_chr2	69429768	69489734	NOV.10311.3	0	+	69489734	69489734	0	2	270,20,	0,59946,
LjG1.1_chr2	69429768	69489734	NOV.10311.3	0	+	69489734	69489734	0	2	270,20,	0,59946,
LjG1.1_chr2	69582125	69583287	NOV.10322.1	0	+	69583287	69583287	0	2	55,215,	0,947,
LjG1.1_chr2	69582125	69583287	NOV.10322.1	0	+	69583287	69583287	0	2	55,215,	0,947,
LjG1.1_chr1	12499031	12499720	NOV.1034.1	0	-	12499720	12499720	0	1	689,	0,
LjG1.1_chr2	69996018	69996552	NOV.10352.1	0	+	69996552	69996552	0	1	534,	0,
LjG1.1_chr2	70115164	70121964	NOV.10363.1	0	-	70121964	70121964	0	2	612,111,	0,6689,
LjG1.1_chr1	12524744	12663214	NOV.1039.1	0	+	12663214	12663214	0	3	78,261,27,	0,590,138443,
LjG1.1_chr1	12524744	12663214	NOV.1039.1	0	+	12663214	12663214	0	3	78,261,27,	0,590,138443,
LjG1.1_chr1	12524744	12663214	NOV.1039.1	0	+	12663214	12663214	0	3	78,261,27,	0,590,138443,
LjG1.1_chr1	12524744	12663214	NOV.1039.1	0	+	12663214	12663214	0	3	78,261,27,	0,590,138443,
LjG1.1_chr2	70816892	70820078	NOV.10406.1	0	-	70820078	70820078	0	6	164,71,120,119,82,271,	0,957,1711,2270,2567,2915,
LjG1.1_chr2	70816892	70820078	NOV.10406.1	0	-	70820078	70820078	0	6	164,71,120,119,82,271,	0,957,1711,2270,2567,2915,
LjG1.1_chr2	70816892	70820078	NOV.10406.1	0	-	70820078	70820078	0	6	164,71,120,119,82,271,	0,957,1711,2270,2567,2915,
LjG1.1_chr2	71244385	71245020	NOV.10432.1	0	+	71245020	71245020	0	1	635,	0,
LjG1.1_chr2	71365950	71430627	NOV.10441.3	0	+	71430627	71430627	0	4	155,131,406,14,	0,759,1015,64663,
LjG1.1_chr2	71365950	71430627	NOV.10441.3	0	+	71430627	71430627	0	4	155,131,406,14,	0,759,1015,64663,
LjG1.1_chr2	71365950	71430627	NOV.10441.3	0	+	71430627	71430627	0	4	155,131,406,14,	0,759,1015,64663,
LjG1.1_chr2	71365950	71430627	NOV.10441.3	0	+	71430627	71430627	0	4	155,131,406,14,	0,759,1015,64663,
LjG1.1_chr2	71365950	71430627	NOV.10441.3	0	+	71430627	71430627	0	4	155,131,406,14,	0,759,1015,64663,
LjG1.1_chr2	71399287	71399967	NOV.10445.1	0	+	71399967	71399967	0	2	31,234,	0,446,
LjG1.1_chr2	71400379	71402280	NOV.10446.1	0	+	71402280	71402280	0	3	482,111,28,	0,1636,1873,
LjG1.1_chr2	71400379	71402280	NOV.10446.1	0	+	71402280	71402280	0	3	482,111,28,	0,1636,1873,
LjG1.1_chr2	71567470	71568953	NOV.10461.1	0	+	71568953	71568953	0	2	269,730,	0,753,
LjG1.1_chr2	71567470	71568680	NOV.10461.2	0	+	71568680	71568680	0	2	249,457,	0,753,
LjG1.1_chr2	71567498	71568694	NOV.10461.3	0	+	71568694	71568694	0	3	48,108,471,	0,133,725,
LjG1.1_chr2	71567530	71568720	NOV.10461.4	0	+	71568720	71568720	0	2	31,497,	0,693,
LjG1.1_chr2	71646446	71646656	NOV.10468.1	0	-	71646656	71646656	0	1	210,	0,
LjG1.1_chr2	71646446	71646656	NOV.10468.1	0	-	71646656	71646656	0	1	210,	0,
LjG1.1_chr2	71664899	71665217	NOV.10470.1	0	-	71665217	71665217	0	1	318,	0,
LjG1.1_chr2	71664899	71665217	NOV.10470.1	0	-	71665217	71665217	0	1	318,	0,
LjG1.1_chr2	71816677	71817580	NOV.10491.1	0	-	71817580	71817580	0	1	903,	0,
LjG1.1_chr2	71961701	72037163	NOV.10501.2	0	+	72037163	72037163	0	3	19,746,15,	0,1256,75447,
LjG1.1_chr2	71961701	72037163	NOV.10501.2	0	+	72037163	72037163	0	3	19,746,15,	0,1256,75447,
LjG1.1_chr2	71990517	71991225	NOV.10505.1	0	-	71991225	71991225	0	1	708,	0,
LjG1.1_chr2	71992676	72281131	NOV.10506.2	0	-	72281131	72281131	0	2	20,184,	0,288271,
LjG1.1_chr2	71992676	72281131	NOV.10506.2	0	-	72281131	72281131	0	2	20,184,	0,288271,
LjG1.1_chr2	71992676	72281131	NOV.10506.2	0	-	72281131	72281131	0	2	20,184,	0,288271,
LjG1.1_chr2	71992676	72281131	NOV.10506.2	0	-	72281131	72281131	0	2	20,184,	0,288271,
LjG1.1_chr2	71992676	72281131	NOV.10506.2	0	-	72281131	72281131	0	2	20,184,	0,288271,
LjG1.1_chr2	71992676	72281131	NOV.10506.2	0	-	72281131	72281131	0	2	20,184,	0,288271,
LjG1.1_chr2	71992676	72281131	NOV.10506.2	0	-	72281131	72281131	0	2	20,184,	0,288271,
LjG1.1_chr2	71992676	72281131	NOV.10506.2	0	-	72281131	72281131	0	2	20,184,	0,288271,
LjG1.1_chr2	71992676	72281131	NOV.10506.2	0	-	72281131	72281131	0	2	20,184,	0,288271,
LjG1.1_chr2	71992676	72281131	NOV.10506.2	0	-	72281131	72281131	0	2	20,184,	0,288271,
LjG1.1_chr2	71992676	72281131	NOV.10506.2	0	-	72281131	72281131	0	2	20,184,	0,288271,
LjG1.1_chr2	71992676	72281131	NOV.10506.2	0	-	72281131	72281131	0	2	20,184,	0,288271,
LjG1.1_chr2	71992676	72281131	NOV.10506.2	0	-	72281131	72281131	0	2	20,184,	0,288271,
LjG1.1_chr2	71992676	72281131	NOV.10506.2	0	-	72281131	72281131	0	2	20,184,	0,288271,
LjG1.1_chr2	71992676	72281131	NOV.10506.2	0	-	72281131	72281131	0	2	20,184,	0,288271,
LjG1.1_chr2	71992676	72281131	NOV.10506.2	0	-	72281131	72281131	0	2	20,184,	0,288271,
LjG1.1_chr2	71992676	72281131	NOV.10506.2	0	-	72281131	72281131	0	2	20,184,	0,288271,
LjG1.1_chr2	71992676	72281131	NOV.10506.2	0	-	72281131	72281131	0	2	20,184,	0,288271,
LjG1.1_chr2	71992676	72281131	NOV.10506.2	0	-	72281131	72281131	0	2	20,184,	0,288271,
LjG1.1_chr2	71992676	72281131	NOV.10506.2	0	-	72281131	72281131	0	2	20,184,	0,288271,
LjG1.1_chr2	71992676	72281131	NOV.10506.2	0	-	72281131	72281131	0	2	20,184,	0,288271,
LjG1.1_chr2	71992676	72281131	NOV.10506.2	0	-	72281131	72281131	0	2	20,184,	0,288271,
LjG1.1_chr2	71992676	72281131	NOV.10506.2	0	-	72281131	72281131	0	2	20,184,	0,288271,
LjG1.1_chr2	71992676	72281131	NOV.10506.2	0	-	72281131	72281131	0	2	20,184,	0,288271,
LjG1.1_chr2	71992676	72281131	NOV.10506.2	0	-	72281131	72281131	0	2	20,184,	0,288271,
LjG1.1_chr2	72055047	72065678	NOV.10513.4	0	+	72065678	72065678	0	2	305,229,	0,10402,
LjG1.1_chr2	72064044	72067412	NOV.10514.1	0	-	72067412	72067412	0	2	400,27,	0,3341,
LjG1.1_chr2	72222918	72223272	NOV.10530.1	0	+	72223272	72223272	0	1	354,	0,
LjG1.1_chr2	72347741	72349846	NOV.10548.1	0	-	72349846	72349846	0	4	67,245,119,144,	0,184,1621,1961,
LjG1.1_chr2	72744301	72744585	NOV.10571.1	0	-	72744585	72744585	0	1	284,	0,
LjG1.1_chr2	72747849	72748803	NOV.10572.1	0	-	72748803	72748803	0	1	954,	0,
LjG1.1_chr2	72811362	72812024	NOV.10579.1	0	+	72812024	72812024	0	3	31,181,35,	0,117,627,
LjG1.1_chr2	72811362	72812024	NOV.10579.1	0	+	72812024	72812024	0	3	31,181,35,	0,117,627,
LjG1.1_chr2	72845376	72845996	NOV.10584.1	0	-	72845996	72845996	0	1	620,	0,
LjG1.1_chr2	72845376	72845996	NOV.10584.1	0	-	72845996	72845996	0	1	620,	0,
LjG1.1_chr2	72936950	72937374	NOV.10591.1	0	-	72937374	72937374	0	1	424,	0,
LjG1.1_chr2	73088127	73104279	NOV.10604.1	0	+	73104279	73104279	0	3	241,478,16,	0,422,16136,
LjG1.1_chr2	73088127	73104279	NOV.10604.1	0	+	73104279	73104279	0	3	241,478,16,	0,422,16136,
LjG1.1_chr2	73088127	73104279	NOV.10604.1	0	+	73104279	73104279	0	3	241,478,16,	0,422,16136,
LjG1.1_chr2	73170897	73232765	NOV.10611.1	0	+	73232765	73232765	0	2	31,402,	0,61466,
LjG1.1_chr2	73279942	73280181	NOV.10616.1	0	+	73280181	73280181	0	1	239,	0,
LjG1.1_chr2	73417975	73423635	NOV.10627.1	0	+	73423635	73423635	0	3	71,120,22,	0,3465,5638,
LjG1.1_chr2	73420104	73420944	NOV.10628.1	0	+	73420944	73420944	0	1	840,	0,
LjG1.1_chr2	73635443	73635768	NOV.10648.1	0	+	73635768	73635768	0	1	325,	0,
LjG1.1_chr2	73635443	73635768	NOV.10648.1	0	+	73635768	73635768	0	1	325,	0,
LjG1.1_chr2	73697731	73697938	NOV.10652.1	0	-	73697938	73697938	0	1	207,	0,
LjG1.1_chr2	73700890	73701143	NOV.10654.1	0	+	73701143	73701143	0	1	253,	0,
LjG1.1_chr2	73711157	73711810	NOV.10657.1	0	-	73711810	73711810	0	1	653,	0,
LjG1.1_chr2	73743864	73744331	NOV.10660.1	0	-	73744331	73744331	0	1	467,	0,
LjG1.1_chr2	73827521	73828072	NOV.10670.1	0	+	73828072	73828072	0	1	551,	0,
LjG1.1_chr2	73904836	73970909	NOV.10674.11	0	-	73970909	73970909	0	2	43,383,	0,65690,
LjG1.1_chr2	73904841	73970863	NOV.10674.13	0	-	73970863	73970863	0	2	44,347,	0,65675,
LjG1.1_chr2	74133092	74271896	NOV.10686.11	0	+	74271896	74271896	0	9	21,76,65,100,42,42,139,363,238,	0,124,1299,1528,2302,5933,6069,7624,138566,
LjG1.1_chr2	74133092	74271896	NOV.10686.11	0	+	74271896	74271896	0	9	21,76,65,100,42,42,139,363,238,	0,124,1299,1528,2302,5933,6069,7624,138566,
LjG1.1_chr2	74133092	74271896	NOV.10686.11	0	+	74271896	74271896	0	9	21,76,65,100,42,42,139,363,238,	0,124,1299,1528,2302,5933,6069,7624,138566,
LjG1.1_chr2	74133092	74271896	NOV.10686.11	0	+	74271896	74271896	0	9	21,76,65,100,42,42,139,363,238,	0,124,1299,1528,2302,5933,6069,7624,138566,
LjG1.1_chr2	74171866	74271878	NOV.10686.14	0	+	74271878	74271878	0	2	1120,220,	0,99792,
LjG1.1_chr2	74171866	74271878	NOV.10686.14	0	+	74271878	74271878	0	2	1120,220,	0,99792,
LjG1.1_chr2	74171866	74271701	NOV.10686.15	0	+	74271701	74271701	0	2	1122,42,	0,99793,
LjG1.1_chr2	74171866	74271701	NOV.10686.15	0	+	74271701	74271701	0	2	1122,42,	0,99793,
LjG1.1_chr2	74171867	74271706	NOV.10686.16	0	+	74271706	74271706	0	3	89,373,47,	0,746,99792,
LjG1.1_chr2	74171867	74271706	NOV.10686.16	0	+	74271706	74271706	0	3	89,373,47,	0,746,99792,
LjG1.1_chr2	74171974	74271788	NOV.10686.18	0	+	74271788	74271788	0	3	411,409,128,	0,606,99686,
LjG1.1_chr2	74171974	74271788	NOV.10686.18	0	+	74271788	74271788	0	3	411,409,128,	0,606,99686,
LjG1.1_chr2	74212645	74271694	NOV.10686.23	0	+	74271694	74271694	0	4	20,443,376,34,	0,695,1223,59015,
LjG1.1_chr2	74116455	74271896	NOV.10686.3	0	+	74271896	74271896	0	3	16,641,237,	0,356,155204,
LjG1.1_chr2	74116455	74271896	NOV.10686.3	0	+	74271896	74271896	0	3	16,641,237,	0,356,155204,
LjG1.1_chr2	74116455	74271896	NOV.10686.3	0	+	74271896	74271896	0	3	16,641,237,	0,356,155204,
LjG1.1_chr2	74116455	74271896	NOV.10686.3	0	+	74271896	74271896	0	3	16,641,237,	0,356,155204,
LjG1.1_chr2	74116807	74271756	NOV.10686.4	0	+	74271756	74271756	0	2	487,96,	0,154853,
LjG1.1_chr2	74116807	74271756	NOV.10686.4	0	+	74271756	74271756	0	2	487,96,	0,154853,
LjG1.1_chr2	74116807	74271756	NOV.10686.4	0	+	74271756	74271756	0	2	487,96,	0,154853,
LjG1.1_chr2	74116807	74271756	NOV.10686.4	0	+	74271756	74271756	0	2	487,96,	0,154853,
LjG1.1_chr2	74151982	74905008	NOV.10690.1	0	-	74905008	74905008	0	4	20,35,584,173,	0,609928,751925,752853,
LjG1.1_chr2	74151982	74905008	NOV.10690.1	0	-	74905008	74905008	0	4	20,35,584,173,	0,609928,751925,752853,
LjG1.1_chr2	74151982	74905008	NOV.10690.1	0	-	74905008	74905008	0	4	20,35,584,173,	0,609928,751925,752853,
LjG1.1_chr2	74151982	74905008	NOV.10690.1	0	-	74905008	74905008	0	4	20,35,584,173,	0,609928,751925,752853,
LjG1.1_chr2	74151982	74905008	NOV.10690.1	0	-	74905008	74905008	0	4	20,35,584,173,	0,609928,751925,752853,
LjG1.1_chr2	74151982	74905008	NOV.10690.1	0	-	74905008	74905008	0	4	20,35,584,173,	0,609928,751925,752853,
LjG1.1_chr2	74151982	74905008	NOV.10690.1	0	-	74905008	74905008	0	4	20,35,584,173,	0,609928,751925,752853,
LjG1.1_chr2	74151982	74905008	NOV.10690.1	0	-	74905008	74905008	0	4	20,35,584,173,	0,609928,751925,752853,
LjG1.1_chr2	74151982	74905008	NOV.10690.1	0	-	74905008	74905008	0	4	20,35,584,173,	0,609928,751925,752853,
LjG1.1_chr2	74151982	74905008	NOV.10690.1	0	-	74905008	74905008	0	4	20,35,584,173,	0,609928,751925,752853,
LjG1.1_chr2	74151982	74905008	NOV.10690.1	0	-	74905008	74905008	0	4	20,35,584,173,	0,609928,751925,752853,
LjG1.1_chr2	74151982	74905008	NOV.10690.1	0	-	74905008	74905008	0	4	20,35,584,173,	0,609928,751925,752853,
LjG1.1_chr2	74151982	74905008	NOV.10690.1	0	-	74905008	74905008	0	4	20,35,584,173,	0,609928,751925,752853,
LjG1.1_chr2	74151982	74905008	NOV.10690.1	0	-	74905008	74905008	0	4	20,35,584,173,	0,609928,751925,752853,
LjG1.1_chr2	74151982	74905008	NOV.10690.1	0	-	74905008	74905008	0	4	20,35,584,173,	0,609928,751925,752853,
LjG1.1_chr2	74151982	74905008	NOV.10690.1	0	-	74905008	74905008	0	4	20,35,584,173,	0,609928,751925,752853,
LjG1.1_chr2	74151982	74905008	NOV.10690.1	0	-	74905008	74905008	0	4	20,35,584,173,	0,609928,751925,752853,
LjG1.1_chr2	74151982	74905008	NOV.10690.1	0	-	74905008	74905008	0	4	20,35,584,173,	0,609928,751925,752853,
LjG1.1_chr2	74151982	74905008	NOV.10690.1	0	-	74905008	74905008	0	4	20,35,584,173,	0,609928,751925,752853,
LjG1.1_chr2	74151982	74905008	NOV.10690.1	0	-	74905008	74905008	0	4	20,35,584,173,	0,609928,751925,752853,
LjG1.1_chr2	74151982	74905008	NOV.10690.1	0	-	74905008	74905008	0	4	20,35,584,173,	0,609928,751925,752853,
LjG1.1_chr2	74151982	74905008	NOV.10690.1	0	-	74905008	74905008	0	4	20,35,584,173,	0,609928,751925,752853,
LjG1.1_chr2	74151982	74905008	NOV.10690.1	0	-	74905008	74905008	0	4	20,35,584,173,	0,609928,751925,752853,
LjG1.1_chr2	74151982	74905008	NOV.10690.1	0	-	74905008	74905008	0	4	20,35,584,173,	0,609928,751925,752853,
LjG1.1_chr2	74151982	74905008	NOV.10690.1	0	-	74905008	74905008	0	4	20,35,584,173,	0,609928,751925,752853,
LjG1.1_chr2	74151982	74905008	NOV.10690.1	0	-	74905008	74905008	0	4	20,35,584,173,	0,609928,751925,752853,
LjG1.1_chr2	74151982	74905008	NOV.10690.1	0	-	74905008	74905008	0	4	20,35,584,173,	0,609928,751925,752853,
LjG1.1_chr2	74151982	74905008	NOV.10690.1	0	-	74905008	74905008	0	4	20,35,584,173,	0,609928,751925,752853,
LjG1.1_chr2	74151982	74905008	NOV.10690.1	0	-	74905008	74905008	0	4	20,35,584,173,	0,609928,751925,752853,
LjG1.1_chr2	74151982	74905008	NOV.10690.1	0	-	74905008	74905008	0	4	20,35,584,173,	0,609928,751925,752853,
LjG1.1_chr2	74151982	74905008	NOV.10690.1	0	-	74905008	74905008	0	4	20,35,584,173,	0,609928,751925,752853,
LjG1.1_chr2	74151982	74905008	NOV.10690.1	0	-	74905008	74905008	0	4	20,35,584,173,	0,609928,751925,752853,
LjG1.1_chr2	74151982	74905008	NOV.10690.1	0	-	74905008	74905008	0	4	20,35,584,173,	0,609928,751925,752853,
LjG1.1_chr2	74151982	74905008	NOV.10690.1	0	-	74905008	74905008	0	4	20,35,584,173,	0,609928,751925,752853,
LjG1.1_chr2	74151982	74905008	NOV.10690.1	0	-	74905008	74905008	0	4	20,35,584,173,	0,609928,751925,752853,
LjG1.1_chr2	74151982	74905008	NOV.10690.1	0	-	74905008	74905008	0	4	20,35,584,173,	0,609928,751925,752853,
LjG1.1_chr2	74151982	74905008	NOV.10690.1	0	-	74905008	74905008	0	4	20,35,584,173,	0,609928,751925,752853,
LjG1.1_chr2	74151982	74905008	NOV.10690.1	0	-	74905008	74905008	0	4	20,35,584,173,	0,609928,751925,752853,
LjG1.1_chr2	74151982	74905008	NOV.10690.1	0	-	74905008	74905008	0	4	20,35,584,173,	0,609928,751925,752853,
LjG1.1_chr2	74151982	74905008	NOV.10690.1	0	-	74905008	74905008	0	4	20,35,584,173,	0,609928,751925,752853,
LjG1.1_chr2	74151982	74905008	NOV.10690.1	0	-	74905008	74905008	0	4	20,35,584,173,	0,609928,751925,752853,
LjG1.1_chr2	74901144	74901748	NOV.10690.15	0	-	74901748	74901748	0	2	123,354,	0,250,
LjG1.1_chr2	74761895	75273556	NOV.10690.5	0	-	75273556	75273556	0	2	49,626,	0,511035,
LjG1.1_chr2	74761895	75273556	NOV.10690.5	0	-	75273556	75273556	0	2	49,626,	0,511035,
LjG1.1_chr2	74761895	75273556	NOV.10690.5	0	-	75273556	75273556	0	2	49,626,	0,511035,
LjG1.1_chr2	74761895	75273556	NOV.10690.5	0	-	75273556	75273556	0	2	49,626,	0,511035,
LjG1.1_chr2	74761895	75273556	NOV.10690.5	0	-	75273556	75273556	0	2	49,626,	0,511035,
LjG1.1_chr2	74761895	75273556	NOV.10690.5	0	-	75273556	75273556	0	2	49,626,	0,511035,
LjG1.1_chr2	74761895	75273556	NOV.10690.5	0	-	75273556	75273556	0	2	49,626,	0,511035,
LjG1.1_chr2	74761895	75273556	NOV.10690.5	0	-	75273556	75273556	0	2	49,626,	0,511035,
LjG1.1_chr2	74761895	75273556	NOV.10690.5	0	-	75273556	75273556	0	2	49,626,	0,511035,
LjG1.1_chr2	74761895	75273556	NOV.10690.5	0	-	75273556	75273556	0	2	49,626,	0,511035,
LjG1.1_chr2	74761895	75273556	NOV.10690.5	0	-	75273556	75273556	0	2	49,626,	0,511035,
LjG1.1_chr2	74761895	75273556	NOV.10690.5	0	-	75273556	75273556	0	2	49,626,	0,511035,
LjG1.1_chr2	74761895	75273556	NOV.10690.5	0	-	75273556	75273556	0	2	49,626,	0,511035,
LjG1.1_chr2	74761895	75273556	NOV.10690.5	0	-	75273556	75273556	0	2	49,626,	0,511035,
LjG1.1_chr2	74761895	75273556	NOV.10690.5	0	-	75273556	75273556	0	2	49,626,	0,511035,
LjG1.1_chr2	74761895	75273556	NOV.10690.5	0	-	75273556	75273556	0	2	49,626,	0,511035,
LjG1.1_chr2	74761895	75273556	NOV.10690.5	0	-	75273556	75273556	0	2	49,626,	0,511035,
LjG1.1_chr2	74761895	75273556	NOV.10690.5	0	-	75273556	75273556	0	2	49,626,	0,511035,
LjG1.1_chr2	74761895	75273556	NOV.10690.5	0	-	75273556	75273556	0	2	49,626,	0,511035,
LjG1.1_chr2	74761895	75273556	NOV.10690.5	0	-	75273556	75273556	0	2	49,626,	0,511035,
LjG1.1_chr2	74761895	75273556	NOV.10690.5	0	-	75273556	75273556	0	2	49,626,	0,511035,
LjG1.1_chr2	74761895	75273556	NOV.10690.5	0	-	75273556	75273556	0	2	49,626,	0,511035,
LjG1.1_chr2	74761895	75273556	NOV.10690.5	0	-	75273556	75273556	0	2	49,626,	0,511035,
LjG1.1_chr2	74761895	75273556	NOV.10690.5	0	-	75273556	75273556	0	2	49,626,	0,511035,
LjG1.1_chr2	74761895	75273556	NOV.10690.5	0	-	75273556	75273556	0	2	49,626,	0,511035,
LjG1.1_chr2	74761895	75273556	NOV.10690.5	0	-	75273556	75273556	0	2	49,626,	0,511035,
LjG1.1_chr2	74761895	75273556	NOV.10690.5	0	-	75273556	75273556	0	2	49,626,	0,511035,
LjG1.1_chr2	74761895	75273556	NOV.10690.5	0	-	75273556	75273556	0	2	49,626,	0,511035,
LjG1.1_chr2	74761895	75273556	NOV.10690.5	0	-	75273556	75273556	0	2	49,626,	0,511035,
LjG1.1_chr2	74761895	75273556	NOV.10690.5	0	-	75273556	75273556	0	2	49,626,	0,511035,
LjG1.1_chr2	74761895	75273556	NOV.10690.5	0	-	75273556	75273556	0	2	49,626,	0,511035,
LjG1.1_chr2	74761895	75273556	NOV.10690.5	0	-	75273556	75273556	0	2	49,626,	0,511035,
LjG1.1_chr2	74761895	75273556	NOV.10690.5	0	-	75273556	75273556	0	2	49,626,	0,511035,
LjG1.1_chr2	74761895	75273556	NOV.10690.5	0	-	75273556	75273556	0	2	49,626,	0,511035,
LjG1.1_chr2	74761895	75273556	NOV.10690.5	0	-	75273556	75273556	0	2	49,626,	0,511035,
LjG1.1_chr2	74761895	75273556	NOV.10690.5	0	-	75273556	75273556	0	2	49,626,	0,511035,
LjG1.1_chr2	74761907	74902163	NOV.10690.8	0	-	74902163	74902163	0	2	36,1044,	0,139212,
LjG1.1_chr2	74761907	74902163	NOV.10690.8	0	-	74902163	74902163	0	2	36,1044,	0,139212,
LjG1.1_chr2	74761907	74902163	NOV.10690.8	0	-	74902163	74902163	0	2	36,1044,	0,139212,
LjG1.1_chr2	74761907	74902163	NOV.10690.8	0	-	74902163	74902163	0	2	36,1044,	0,139212,
LjG1.1_chr2	74761907	74902163	NOV.10690.8	0	-	74902163	74902163	0	2	36,1044,	0,139212,
LjG1.1_chr2	74761907	74902163	NOV.10690.8	0	-	74902163	74902163	0	2	36,1044,	0,139212,
LjG1.1_chr2	74761907	74902163	NOV.10690.8	0	-	74902163	74902163	0	2	36,1044,	0,139212,
LjG1.1_chr2	74761907	74902163	NOV.10690.8	0	-	74902163	74902163	0	2	36,1044,	0,139212,
LjG1.1_chr2	74761907	74902163	NOV.10690.8	0	-	74902163	74902163	0	2	36,1044,	0,139212,
LjG1.1_chr2	74761907	74902163	NOV.10690.8	0	-	74902163	74902163	0	2	36,1044,	0,139212,
LjG1.1_chr2	74761907	74902163	NOV.10690.8	0	-	74902163	74902163	0	2	36,1044,	0,139212,
LjG1.1_chr2	74761907	74902163	NOV.10690.8	0	-	74902163	74902163	0	2	36,1044,	0,139212,
LjG1.1_chr2	74684198	74684619	NOV.10735.1	0	+	74684619	74684619	0	1	421,	0,
LjG1.1_chr2	74943387	74985357	NOV.10764.1	0	+	74985357	74985357	0	2	13,542,	0,41428,
LjG1.1_chr2	75372534	75374511	NOV.10800.1	0	-	75374511	75374511	0	1	1977,	0,
LjG1.1_chloro	98249	133223	NOV.108.1	0	+	133223	133223	0	2	1059,83,	0,34891,
LjG1.1_chloro	98249	133223	NOV.108.1	0	+	133223	133223	0	2	1059,83,	0,34891,
LjG1.1_chloro	98249	133223	NOV.108.1	0	+	133223	133223	0	2	1059,83,	0,34891,
LjG1.1_chloro	98249	133223	NOV.108.1	0	+	133223	133223	0	2	1059,83,	0,34891,
LjG1.1_chloro	98249	133223	NOV.108.1	0	+	133223	133223	0	2	1059,83,	0,34891,
LjG1.1_chloro	98249	133223	NOV.108.1	0	+	133223	133223	0	2	1059,83,	0,34891,
LjG1.1_chloro	98249	133223	NOV.108.1	0	+	133223	133223	0	2	1059,83,	0,34891,
LjG1.1_chloro	98249	133223	NOV.108.1	0	+	133223	133223	0	2	1059,83,	0,34891,
LjG1.1_chloro	98249	133223	NOV.108.1	0	+	133223	133223	0	2	1059,83,	0,34891,
LjG1.1_chloro	98249	133223	NOV.108.1	0	+	133223	133223	0	2	1059,83,	0,34891,
LjG1.1_chloro	98249	133223	NOV.108.1	0	+	133223	133223	0	2	1059,83,	0,34891,
LjG1.1_chloro	98249	133223	NOV.108.1	0	+	133223	133223	0	2	1059,83,	0,34891,
LjG1.1_chloro	98249	133223	NOV.108.1	0	+	133223	133223	0	2	1059,83,	0,34891,
LjG1.1_chloro	98249	133223	NOV.108.1	0	+	133223	133223	0	2	1059,83,	0,34891,
LjG1.1_chloro	98249	133223	NOV.108.1	0	+	133223	133223	0	2	1059,83,	0,34891,
LjG1.1_chloro	98249	133223	NOV.108.1	0	+	133223	133223	0	2	1059,83,	0,34891,
LjG1.1_chloro	101922	130561	NOV.108.10	0	+	130561	130561	0	2	533,577,	0,28062,
LjG1.1_chloro	101922	130561	NOV.108.10	0	+	130561	130561	0	2	533,577,	0,28062,
LjG1.1_chloro	101922	130561	NOV.108.10	0	+	130561	130561	0	2	533,577,	0,28062,
LjG1.1_chloro	101922	130561	NOV.108.10	0	+	130561	130561	0	2	533,577,	0,28062,
LjG1.1_chloro	101922	130561	NOV.108.10	0	+	130561	130561	0	2	533,577,	0,28062,
LjG1.1_chloro	101922	130561	NOV.108.10	0	+	130561	130561	0	2	533,577,	0,28062,
LjG1.1_chloro	101922	130561	NOV.108.10	0	+	130561	130561	0	2	533,577,	0,28062,
LjG1.1_chloro	101922	130561	NOV.108.10	0	+	130561	130561	0	2	533,577,	0,28062,
LjG1.1_chloro	101922	130561	NOV.108.10	0	+	130561	130561	0	2	533,577,	0,28062,
LjG1.1_chloro	101922	130561	NOV.108.10	0	+	130561	130561	0	2	533,577,	0,28062,
LjG1.1_chloro	101922	130561	NOV.108.10	0	+	130561	130561	0	2	533,577,	0,28062,
LjG1.1_chloro	101922	130561	NOV.108.10	0	+	130561	130561	0	2	533,577,	0,28062,
LjG1.1_chloro	101922	130561	NOV.108.10	0	+	130561	130561	0	2	533,577,	0,28062,
LjG1.1_chloro	101922	130561	NOV.108.10	0	+	130561	130561	0	2	533,577,	0,28062,
LjG1.1_chr2	75550052	75550522	NOV.10819.1	0	+	75550522	75550522	0	2	14,344,	0,126,
LjG1.1_chr2	75812546	75883465	NOV.10823.10	0	-	75883465	75883465	0	3	15,334,16,	0,69321,70903,
LjG1.1_chr2	75812546	75883465	NOV.10823.10	0	-	75883465	75883465	0	3	15,334,16,	0,69321,70903,
LjG1.1_chr2	75592655	75790582	NOV.10823.2	0	-	75790582	75790582	0	2	44,523,	0,197404,
LjG1.1_chr2	75592655	75790582	NOV.10823.2	0	-	75790582	75790582	0	2	44,523,	0,197404,
LjG1.1_chr2	75592655	75790582	NOV.10823.2	0	-	75790582	75790582	0	2	44,523,	0,197404,
LjG1.1_chr2	75592655	75790582	NOV.10823.2	0	-	75790582	75790582	0	2	44,523,	0,197404,
LjG1.1_chr2	75592655	75790582	NOV.10823.2	0	-	75790582	75790582	0	2	44,523,	0,197404,
LjG1.1_chr2	75592655	75790582	NOV.10823.2	0	-	75790582	75790582	0	2	44,523,	0,197404,
LjG1.1_chr2	75592655	75790582	NOV.10823.2	0	-	75790582	75790582	0	2	44,523,	0,197404,
LjG1.1_chr2	75592655	75790582	NOV.10823.2	0	-	75790582	75790582	0	2	44,523,	0,197404,
LjG1.1_chr2	75592655	75790582	NOV.10823.2	0	-	75790582	75790582	0	2	44,523,	0,197404,
LjG1.1_chr2	75592655	75790582	NOV.10823.2	0	-	75790582	75790582	0	2	44,523,	0,197404,
LjG1.1_chr2	75592655	75790582	NOV.10823.2	0	-	75790582	75790582	0	2	44,523,	0,197404,
LjG1.1_chr2	75592655	75790582	NOV.10823.2	0	-	75790582	75790582	0	2	44,523,	0,197404,
LjG1.1_chr1	13524948	13596132	NOV.1083.1	0	-	13596132	13596132	0	4	17,491,31,206,	0,69898,70499,70978,
LjG1.1_chr1	13524948	13595479	NOV.1083.4	0	-	13595479	13595479	0	3	17,459,32,	0,69930,70499,
LjG1.1_chr2	75882732	75882996	NOV.10848.1	0	+	75882996	75882996	0	1	264,	0,
LjG1.1_chr2	75886470	75887359	NOV.10850.1	0	+	75887359	75887359	0	2	334,436,	0,453,
LjG1.1_chr2	75886550	75887368	NOV.10850.2	0	+	75887368	75887368	0	1	818,	0,
LjG1.1_chr2	75929844	76100834	NOV.10855.11	0	-	76100834	76100834	0	3	24,547,38,	0,169364,170952,
LjG1.1_chr2	75929844	76100834	NOV.10855.11	0	-	76100834	76100834	0	3	24,547,38,	0,169364,170952,
LjG1.1_chr2	75929844	76100834	NOV.10855.11	0	-	76100834	76100834	0	3	24,547,38,	0,169364,170952,
LjG1.1_chr2	75929844	76100834	NOV.10855.11	0	-	76100834	76100834	0	3	24,547,38,	0,169364,170952,
LjG1.1_chr2	75929844	76100834	NOV.10855.11	0	-	76100834	76100834	0	3	24,547,38,	0,169364,170952,
LjG1.1_chr2	75929844	76100834	NOV.10855.11	0	-	76100834	76100834	0	3	24,547,38,	0,169364,170952,
LjG1.1_chr2	75932548	75949814	NOV.10856.4	0	+	75949814	75949814	0	4	166,145,375,18,	0,261,1368,17248,
LjG1.1_chr2	75932548	75949814	NOV.10856.5	0	+	75949814	75949814	0	4	166,146,468,18,	0,261,1400,17248,
LjG1.1_chr2	75932548	75949814	NOV.10856.6	0	+	75949814	75949814	0	4	166,146,343,18,	0,261,1400,17248,
LjG1.1_chr2	75932837	75949814	NOV.10856.7	0	+	75949814	75949814	0	3	118,287,19,	0,1111,16958,
LjG1.1_chr2	76025776	76025982	NOV.10863.1	0	+	76025982	76025982	0	1	206,	0,
LjG1.1_chr2	76172684	76173583	NOV.10880.1	0	+	76173583	76173583	0	1	899,	0,
LjG1.1_chr2	76172684	76173583	NOV.10880.1	0	+	76173583	76173583	0	1	899,	0,
LjG1.1_chloro	101922	128336	NOV.108.9	0	+	128336	128336	0	2	2543,370,	0,26044,
LjG1.1_chloro	101922	128336	NOV.108.9	0	+	128336	128336	0	2	2543,370,	0,26044,
LjG1.1_chloro	101922	128336	NOV.108.9	0	+	128336	128336	0	2	2543,370,	0,26044,
LjG1.1_chloro	101922	128336	NOV.108.9	0	+	128336	128336	0	2	2543,370,	0,26044,
LjG1.1_chloro	101922	128336	NOV.108.9	0	+	128336	128336	0	2	2543,370,	0,26044,
LjG1.1_chloro	101922	128336	NOV.108.9	0	+	128336	128336	0	2	2543,370,	0,26044,
LjG1.1_chloro	101922	128336	NOV.108.9	0	+	128336	128336	0	2	2543,370,	0,26044,
LjG1.1_chloro	101922	128336	NOV.108.9	0	+	128336	128336	0	2	2543,370,	0,26044,
LjG1.1_chloro	101922	128336	NOV.108.9	0	+	128336	128336	0	2	2543,370,	0,26044,
LjG1.1_chloro	101922	128336	NOV.108.9	0	+	128336	128336	0	2	2543,370,	0,26044,
LjG1.1_chloro	101922	128336	NOV.108.9	0	+	128336	128336	0	2	2543,370,	0,26044,
LjG1.1_chloro	101922	128336	NOV.108.9	0	+	128336	128336	0	2	2543,370,	0,26044,
LjG1.1_chloro	101922	128336	NOV.108.9	0	+	128336	128336	0	2	2543,370,	0,26044,
LjG1.1_chloro	101922	128336	NOV.108.9	0	+	128336	128336	0	2	2543,370,	0,26044,
LjG1.1_chr1	13634776	13635295	NOV.1089.1	0	+	13635295	13635295	0	1	519,	0,
LjG1.1_chr2	76385188	76585451	NOV.10892.12	0	+	76585451	76585451	0	2	389,20,	0,200243,
LjG1.1_chr2	76385188	76585451	NOV.10892.12	0	+	76585451	76585451	0	2	389,20,	0,200243,
LjG1.1_chr2	76385188	76585451	NOV.10892.12	0	+	76585451	76585451	0	2	389,20,	0,200243,
LjG1.1_chr2	76385188	76585451	NOV.10892.12	0	+	76585451	76585451	0	2	389,20,	0,200243,
LjG1.1_chr2	76385188	76585451	NOV.10892.12	0	+	76585451	76585451	0	2	389,20,	0,200243,
LjG1.1_chr2	76385188	76585451	NOV.10892.12	0	+	76585451	76585451	0	2	389,20,	0,200243,
LjG1.1_chr2	76385188	76585451	NOV.10892.12	0	+	76585451	76585451	0	2	389,20,	0,200243,
LjG1.1_chr2	76385188	76585451	NOV.10892.12	0	+	76585451	76585451	0	2	389,20,	0,200243,
LjG1.1_chloro	98249	98654	NOV.109.1	0	-	98654	98654	0	1	405,	0,
LjG1.1_chr1	13638387	13638639	NOV.1091.1	0	+	13638639	13638639	0	1	252,	0,
LjG1.1_chr2	76745969	76746351	NOV.10925.1	0	+	76746351	76746351	0	1	382,	0,
LjG1.1_chr2	76791147	76801975	NOV.10928.1	0	-	76801975	76801975	0	3	38,201,237,	0,10238,10591,
LjG1.1_chr2	76856760	76856974	NOV.10931.1	0	+	76856974	76856974	0	1	214,	0,
LjG1.1_chr2	76880160	76881500	NOV.10933.1	0	+	76881500	76881500	0	2	279,272,	0,1068,
LjG1.1_chr2	76880160	76881500	NOV.10933.1	0	+	76881500	76881500	0	2	279,272,	0,1068,
LjG1.1_chr2	77046504	77093266	NOV.10950.2	0	+	77093266	77093266	0	2	14,211,	0,46551,
LjG1.1_chr2	77046504	77093266	NOV.10950.2	0	+	77093266	77093266	0	2	14,211,	0,46551,
LjG1.1_chr2	77046504	77093266	NOV.10950.2	0	+	77093266	77093266	0	2	14,211,	0,46551,
LjG1.1_chr2	77103631	77104497	NOV.10957.1	0	+	77104497	77104497	0	1	866,	0,
LjG1.1_chr2	77200255	77200492	NOV.10960.1	0	-	77200492	77200492	0	1	237,	0,
LjG1.1_chr2	77601518	77728433	NOV.10977.11	0	+	77728433	77728433	0	3	129,827,20,	0,324,126895,
LjG1.1_chr2	77601518	77728433	NOV.10977.11	0	+	77728433	77728433	0	3	129,827,20,	0,324,126895,
LjG1.1_chr2	77601518	77728433	NOV.10977.11	0	+	77728433	77728433	0	3	129,827,20,	0,324,126895,
LjG1.1_chr2	77601518	77728433	NOV.10977.11	0	+	77728433	77728433	0	3	129,827,20,	0,324,126895,
LjG1.1_chr2	77601518	77728433	NOV.10977.11	0	+	77728433	77728433	0	3	129,827,20,	0,324,126895,
LjG1.1_chr2	77601518	77645977	NOV.10977.12	0	+	77645977	77645977	0	3	129,828,13,	0,324,44446,
LjG1.1_chr2	77601618	77645977	NOV.10977.14	0	+	77645977	77645977	0	3	29,822,15,	0,224,44344,
LjG1.1_chloro	0	303	NOV.1.1	0	+	303	303	0	1	303,	0,
LjG1.1_chloro	101895	130534	NOV.110.1	0	-	130534	130534	0	2	571,539,	0,28100,
LjG1.1_chloro	101895	130534	NOV.110.1	0	-	130534	130534	0	2	571,539,	0,28100,
LjG1.1_chloro	101895	130534	NOV.110.1	0	-	130534	130534	0	2	571,539,	0,28100,
LjG1.1_chloro	101895	130534	NOV.110.1	0	-	130534	130534	0	2	571,539,	0,28100,
LjG1.1_chloro	101895	130534	NOV.110.1	0	-	130534	130534	0	2	571,539,	0,28100,
LjG1.1_chloro	101895	130534	NOV.110.1	0	-	130534	130534	0	2	571,539,	0,28100,
LjG1.1_chloro	101895	130534	NOV.110.1	0	-	130534	130534	0	2	571,539,	0,28100,
LjG1.1_chloro	101895	130534	NOV.110.1	0	-	130534	130534	0	2	571,539,	0,28100,
LjG1.1_chr2	77666930	77667419	NOV.11012.1	0	-	77667419	77667419	0	1	489,	0,
LjG1.1_chr2	77679898	77756776	NOV.11016.2	0	-	77756776	77756776	0	2	465,13,	0,76865,
LjG1.1_chr2	77679898	77756776	NOV.11016.2	0	-	77756776	77756776	0	2	465,13,	0,76865,
LjG1.1_chr2	77679898	77756776	NOV.11016.2	0	-	77756776	77756776	0	2	465,13,	0,76865,
LjG1.1_chr2	77679898	77756776	NOV.11016.2	0	-	77756776	77756776	0	2	465,13,	0,76865,
LjG1.1_chr2	77766760	77794683	NOV.11025.6	0	+	77794683	77794683	0	5	134,81,110,355,16,	0,244,1309,1522,27907,
LjG1.1_chr2	77766760	77794683	NOV.11025.7	0	+	77794683	77794683	0	4	325,110,363,16,	0,1309,1522,27907,
LjG1.1_chr2	77766760	77794683	NOV.11025.7	0	+	77794683	77794683	0	4	325,110,363,16,	0,1309,1522,27907,
LjG1.1_chr2	77732587	78211573	NOV.11026.1	0	-	78211573	78211573	0	3	24,311,200,	0,478369,478786,
LjG1.1_chr2	77732587	78211573	NOV.11026.1	0	-	78211573	78211573	0	3	24,311,200,	0,478369,478786,
LjG1.1_chr2	77732587	78211573	NOV.11026.1	0	-	78211573	78211573	0	3	24,311,200,	0,478369,478786,
LjG1.1_chr2	77732587	78211573	NOV.11026.1	0	-	78211573	78211573	0	3	24,311,200,	0,478369,478786,
LjG1.1_chr2	77732587	78211573	NOV.11026.1	0	-	78211573	78211573	0	3	24,311,200,	0,478369,478786,
LjG1.1_chr2	77732587	78211573	NOV.11026.1	0	-	78211573	78211573	0	3	24,311,200,	0,478369,478786,
LjG1.1_chr2	77732587	78211573	NOV.11026.1	0	-	78211573	78211573	0	3	24,311,200,	0,478369,478786,
LjG1.1_chr2	77732587	78211573	NOV.11026.1	0	-	78211573	78211573	0	3	24,311,200,	0,478369,478786,
LjG1.1_chr2	77732587	78211573	NOV.11026.1	0	-	78211573	78211573	0	3	24,311,200,	0,478369,478786,
LjG1.1_chr2	77732587	78211573	NOV.11026.1	0	-	78211573	78211573	0	3	24,311,200,	0,478369,478786,
LjG1.1_chr2	77732587	78211573	NOV.11026.1	0	-	78211573	78211573	0	3	24,311,200,	0,478369,478786,
LjG1.1_chr2	77732587	78211573	NOV.11026.1	0	-	78211573	78211573	0	3	24,311,200,	0,478369,478786,
LjG1.1_chr2	77732587	78211573	NOV.11026.1	0	-	78211573	78211573	0	3	24,311,200,	0,478369,478786,
LjG1.1_chr2	77732587	78211573	NOV.11026.1	0	-	78211573	78211573	0	3	24,311,200,	0,478369,478786,
LjG1.1_chr2	77732587	78211573	NOV.11026.1	0	-	78211573	78211573	0	3	24,311,200,	0,478369,478786,
LjG1.1_chr2	77732587	78211573	NOV.11026.1	0	-	78211573	78211573	0	3	24,311,200,	0,478369,478786,
LjG1.1_chr2	77732587	78211573	NOV.11026.1	0	-	78211573	78211573	0	3	24,311,200,	0,478369,478786,
LjG1.1_chr2	77732587	78211573	NOV.11026.1	0	-	78211573	78211573	0	3	24,311,200,	0,478369,478786,
LjG1.1_chr2	77732587	78211573	NOV.11026.1	0	-	78211573	78211573	0	3	24,311,200,	0,478369,478786,
LjG1.1_chr2	77732587	78211573	NOV.11026.1	0	-	78211573	78211573	0	3	24,311,200,	0,478369,478786,
LjG1.1_chr2	77732587	78211573	NOV.11026.1	0	-	78211573	78211573	0	3	24,311,200,	0,478369,478786,
LjG1.1_chr2	77732587	78211573	NOV.11026.1	0	-	78211573	78211573	0	3	24,311,200,	0,478369,478786,
LjG1.1_chr2	77732587	78211573	NOV.11026.1	0	-	78211573	78211573	0	3	24,311,200,	0,478369,478786,
LjG1.1_chr2	77732587	78211573	NOV.11026.1	0	-	78211573	78211573	0	3	24,311,200,	0,478369,478786,
LjG1.1_chr2	77732587	78211573	NOV.11026.1	0	-	78211573	78211573	0	3	24,311,200,	0,478369,478786,
LjG1.1_chr2	77732587	78211573	NOV.11026.1	0	-	78211573	78211573	0	3	24,311,200,	0,478369,478786,
LjG1.1_chr2	77732587	78211573	NOV.11026.1	0	-	78211573	78211573	0	3	24,311,200,	0,478369,478786,
LjG1.1_chr2	77732587	78211573	NOV.11026.1	0	-	78211573	78211573	0	3	24,311,200,	0,478369,478786,
LjG1.1_chr2	77732587	78211573	NOV.11026.1	0	-	78211573	78211573	0	3	24,311,200,	0,478369,478786,
LjG1.1_chr2	77732587	78211573	NOV.11026.1	0	-	78211573	78211573	0	3	24,311,200,	0,478369,478786,
LjG1.1_chr2	77732587	77739369	NOV.11026.3	0	-	77739369	77739369	0	4	20,191,173,653,	0,4567,5331,6129,
LjG1.1_chr2	77732587	77739369	NOV.11026.3	0	-	77739369	77739369	0	4	20,191,173,653,	0,4567,5331,6129,
LjG1.1_chr2	77732587	77739369	NOV.11026.3	0	-	77739369	77739369	0	4	20,191,173,653,	0,4567,5331,6129,
LjG1.1_chr2	77732588	77809832	NOV.11026.4	0	-	77809832	77809832	0	2	20,686,	0,76558,
LjG1.1_chr2	77732588	77809832	NOV.11026.4	0	-	77809832	77809832	0	2	20,686,	0,76558,
LjG1.1_chr2	77732588	77809832	NOV.11026.4	0	-	77809832	77809832	0	2	20,686,	0,76558,
LjG1.1_chr2	77732588	77809832	NOV.11026.4	0	-	77809832	77809832	0	2	20,686,	0,76558,
LjG1.1_chr2	77732588	77809832	NOV.11026.4	0	-	77809832	77809832	0	2	20,686,	0,76558,
LjG1.1_chr2	77732588	77809832	NOV.11026.4	0	-	77809832	77809832	0	2	20,686,	0,76558,
LjG1.1_chr2	77732588	77809832	NOV.11026.4	0	-	77809832	77809832	0	2	20,686,	0,76558,
LjG1.1_chr2	77732588	77809845	NOV.11026.5	0	-	77809845	77809845	0	2	19,667,	0,76590,
LjG1.1_chr2	77732588	77809845	NOV.11026.5	0	-	77809845	77809845	0	2	19,667,	0,76590,
LjG1.1_chr2	77732588	77809845	NOV.11026.5	0	-	77809845	77809845	0	2	19,667,	0,76590,
LjG1.1_chr2	77732588	77809845	NOV.11026.5	0	-	77809845	77809845	0	2	19,667,	0,76590,
LjG1.1_chr2	77732588	77809845	NOV.11026.5	0	-	77809845	77809845	0	2	19,667,	0,76590,
LjG1.1_chr2	77732588	77809845	NOV.11026.5	0	-	77809845	77809845	0	2	19,667,	0,76590,
LjG1.1_chr2	77732588	77809845	NOV.11026.5	0	-	77809845	77809845	0	2	19,667,	0,76590,
LjG1.1_chr2	77732588	77809845	NOV.11026.5	0	-	77809845	77809845	0	2	19,667,	0,76590,
LjG1.1_chr2	77732592	77809853	NOV.11026.6	0	-	77809853	77809853	0	2	16,678,	0,76583,
LjG1.1_chr2	77732592	77809853	NOV.11026.6	0	-	77809853	77809853	0	2	16,678,	0,76583,
LjG1.1_chr2	77732592	77809853	NOV.11026.6	0	-	77809853	77809853	0	2	16,678,	0,76583,
LjG1.1_chr2	77732592	77809853	NOV.11026.6	0	-	77809853	77809853	0	2	16,678,	0,76583,
LjG1.1_chr2	77732592	77809853	NOV.11026.6	0	-	77809853	77809853	0	2	16,678,	0,76583,
LjG1.1_chr2	77732592	77809853	NOV.11026.6	0	-	77809853	77809853	0	2	16,678,	0,76583,
LjG1.1_chr2	77732592	77809853	NOV.11026.6	0	-	77809853	77809853	0	2	16,678,	0,76583,
LjG1.1_chr2	77732592	77809853	NOV.11026.7	0	-	77809853	77809853	0	2	17,665,	0,76596,
LjG1.1_chr2	77732592	77809853	NOV.11026.7	0	-	77809853	77809853	0	2	17,665,	0,76596,
LjG1.1_chr2	77732592	77809853	NOV.11026.7	0	-	77809853	77809853	0	2	17,665,	0,76596,
LjG1.1_chr2	77732592	77809853	NOV.11026.7	0	-	77809853	77809853	0	2	17,665,	0,76596,
LjG1.1_chr2	77732592	77809853	NOV.11026.7	0	-	77809853	77809853	0	2	17,665,	0,76596,
LjG1.1_chr2	77732592	77809853	NOV.11026.7	0	-	77809853	77809853	0	2	17,665,	0,76596,
LjG1.1_chr2	77732592	77809853	NOV.11026.7	0	-	77809853	77809853	0	2	17,665,	0,76596,
LjG1.1_chr2	77737853	77739497	NOV.11026.9	0	-	77739497	77739497	0	2	238,33,	0,1611,
LjG1.1_chr1	14361166	14667886	NOV.1106.2	0	-	14667886	14667886	0	2	31,878,	0,305842,
LjG1.1_chr1	14361166	14667886	NOV.1106.2	0	-	14667886	14667886	0	2	31,878,	0,305842,
LjG1.1_chr1	14361166	14667886	NOV.1106.2	0	-	14667886	14667886	0	2	31,878,	0,305842,
LjG1.1_chr1	14361166	14667886	NOV.1106.2	0	-	14667886	14667886	0	2	31,878,	0,305842,
LjG1.1_chr1	14361166	14667886	NOV.1106.2	0	-	14667886	14667886	0	2	31,878,	0,305842,
LjG1.1_chr1	14361166	14667886	NOV.1106.2	0	-	14667886	14667886	0	2	31,878,	0,305842,
LjG1.1_chr1	14592894	14680535	NOV.1106.3	0	-	14680535	14680535	0	3	10,554,54,	0,86256,87587,
LjG1.1_chr1	14592894	14680535	NOV.1106.3	0	-	14680535	14680535	0	3	10,554,54,	0,86256,87587,
LjG1.1_chr1	14679079	14680676	NOV.1106.4	0	-	14680676	14680676	0	2	333,38,	0,1559,
LjG1.1_chr1	14679144	14680515	NOV.1106.8	0	-	14680515	14680515	0	3	566,119,35,	0,799,1336,
LjG1.1_chr2	78412469	78416994	NOV.11087.1	0	-	78416994	78416994	0	4	120,188,75,381,	0,193,3996,4144,
LjG1.1_chr2	78453342	78453935	NOV.11093.1	0	+	78453935	78453935	0	1	593,	0,
LjG1.1_chr2	78455371	78456424	NOV.11094.3	0	+	78456424	78456424	0	2	364,486,	0,567,
LjG1.1_chr2	78474912	78475768	NOV.11096.1	0	+	78475768	78475768	0	1	856,	0,
LjG1.1_chr2	78474912	78475768	NOV.11096.1	0	+	78475768	78475768	0	1	856,	0,
LjG1.1_chr2	78481496	78482592	NOV.11098.1	0	+	78482592	78482592	0	1	1096,	0,
LjG1.1_chr2	78557623	78558881	NOV.11108.1	0	-	78558881	78558881	0	3	227,63,164,	0,408,1094,
LjG1.1_chr2	78755960	78756227	NOV.11120.1	0	-	78756227	78756227	0	1	267,	0,
LjG1.1_chr2	78791422	78791915	NOV.11127.1	0	-	78791915	78791915	0	1	493,	0,
LjG1.1_chr2	78858616	78859441	NOV.11133.1	0	-	78859441	78859441	0	1	825,	0,
LjG1.1_chr2	78858662	78859410	NOV.11133.2	0	-	78859410	78859410	0	2	548,26,	0,722,
LjG1.1_chr2	78859856	78860364	NOV.11134.1	0	-	78860364	78860364	0	1	508,	0,
LjG1.1_chr2	79155004	79155726	NOV.11162.1	0	-	79155726	79155726	0	1	722,	0,
LjG1.1_chr2	79155004	79155726	NOV.11162.1	0	-	79155726	79155726	0	1	722,	0,
LjG1.1_chr2	79155004	79155726	NOV.11162.1	0	-	79155726	79155726	0	1	722,	0,
LjG1.1_chr2	79650457	79651004	NOV.11221.1	0	+	79651004	79651004	0	1	547,	0,
LjG1.1_chr2	79693200	79764946	NOV.11224.1	0	-	79764946	79764946	0	2	19,751,	0,70995,
LjG1.1_chr2	79693200	79764946	NOV.11224.1	0	-	79764946	79764946	0	2	19,751,	0,70995,
LjG1.1_chr2	79693200	79764946	NOV.11224.1	0	-	79764946	79764946	0	2	19,751,	0,70995,
LjG1.1_chr2	79693200	79764946	NOV.11224.1	0	-	79764946	79764946	0	2	19,751,	0,70995,
LjG1.1_chr2	79693200	79764946	NOV.11224.1	0	-	79764946	79764946	0	2	19,751,	0,70995,
LjG1.1_chr2	79693200	79764946	NOV.11224.1	0	-	79764946	79764946	0	2	19,751,	0,70995,
LjG1.1_chr2	79693200	79764946	NOV.11224.1	0	-	79764946	79764946	0	2	19,751,	0,70995,
LjG1.1_chr2	79693200	79764946	NOV.11224.1	0	-	79764946	79764946	0	2	19,751,	0,70995,
LjG1.1_chr2	79758333	79764941	NOV.11224.2	0	-	79764941	79764941	0	2	165,595,	0,6013,
LjG1.1_chr2	79815892	79816111	NOV.11235.1	0	-	79816111	79816111	0	1	219,	0,
LjG1.1_chr2	79982261	80122046	NOV.11243.19	0	+	80122046	80122046	0	2	749,443,	0,139342,
LjG1.1_chr2	79982261	80122046	NOV.11243.19	0	+	80122046	80122046	0	2	749,443,	0,139342,
LjG1.1_chr2	79982261	80122046	NOV.11243.19	0	+	80122046	80122046	0	2	749,443,	0,139342,
LjG1.1_chr2	79982261	80122046	NOV.11243.19	0	+	80122046	80122046	0	2	749,443,	0,139342,
LjG1.1_chr2	79982261	80122046	NOV.11243.19	0	+	80122046	80122046	0	2	749,443,	0,139342,
LjG1.1_chr2	79982261	80122046	NOV.11243.19	0	+	80122046	80122046	0	2	749,443,	0,139342,
LjG1.1_chr2	79982261	80122046	NOV.11243.19	0	+	80122046	80122046	0	2	749,443,	0,139342,
LjG1.1_chr2	79982261	80122046	NOV.11243.19	0	+	80122046	80122046	0	2	749,443,	0,139342,
LjG1.1_chr2	79874978	80121656	NOV.11243.4	0	+	80121656	80121656	0	4	33,122,433,53,	0,1392,2034,246625,
LjG1.1_chr2	79874978	80121656	NOV.11243.4	0	+	80121656	80121656	0	4	33,122,433,53,	0,1392,2034,246625,
LjG1.1_chr2	79874978	80121656	NOV.11243.4	0	+	80121656	80121656	0	4	33,122,433,53,	0,1392,2034,246625,
LjG1.1_chr2	79874978	80121656	NOV.11243.4	0	+	80121656	80121656	0	4	33,122,433,53,	0,1392,2034,246625,
LjG1.1_chr2	79874978	80121656	NOV.11243.4	0	+	80121656	80121656	0	4	33,122,433,53,	0,1392,2034,246625,
LjG1.1_chr2	79874978	80121656	NOV.11243.4	0	+	80121656	80121656	0	4	33,122,433,53,	0,1392,2034,246625,
LjG1.1_chr2	79874978	80121656	NOV.11243.4	0	+	80121656	80121656	0	4	33,122,433,53,	0,1392,2034,246625,
LjG1.1_chr2	79874978	80121656	NOV.11243.4	0	+	80121656	80121656	0	4	33,122,433,53,	0,1392,2034,246625,
LjG1.1_chr2	79874978	80121656	NOV.11243.4	0	+	80121656	80121656	0	4	33,122,433,53,	0,1392,2034,246625,
LjG1.1_chr2	79874978	80121656	NOV.11243.4	0	+	80121656	80121656	0	4	33,122,433,53,	0,1392,2034,246625,
LjG1.1_chr2	79874978	80121656	NOV.11243.4	0	+	80121656	80121656	0	4	33,122,433,53,	0,1392,2034,246625,
LjG1.1_chr2	79874978	80121656	NOV.11243.4	0	+	80121656	80121656	0	4	33,122,433,53,	0,1392,2034,246625,
LjG1.1_chr2	79874978	80121656	NOV.11243.4	0	+	80121656	80121656	0	4	33,122,433,53,	0,1392,2034,246625,
LjG1.1_chr2	79874978	80121656	NOV.11243.4	0	+	80121656	80121656	0	4	33,122,433,53,	0,1392,2034,246625,
LjG1.1_chr2	79874978	80121656	NOV.11243.4	0	+	80121656	80121656	0	4	33,122,433,53,	0,1392,2034,246625,
LjG1.1_chr2	79919540	79921194	NOV.11250.1	0	+	79921194	79921194	0	3	60,316,465,	0,186,1189,
LjG1.1_chr2	79953419	80093015	NOV.11254.1	0	-	80093015	80093015	0	3	22,382,259,	0,138751,139337,
LjG1.1_chr2	79953419	80093015	NOV.11254.1	0	-	80093015	80093015	0	3	22,382,259,	0,138751,139337,
LjG1.1_chr2	79953419	80093015	NOV.11254.1	0	-	80093015	80093015	0	3	22,382,259,	0,138751,139337,
LjG1.1_chr2	79953419	80093015	NOV.11254.1	0	-	80093015	80093015	0	3	22,382,259,	0,138751,139337,
LjG1.1_chr2	80092148	80093022	NOV.11254.10	0	-	80093022	80093022	0	2	370,251,	0,623,
LjG1.1_chr2	80092148	80093022	NOV.11254.11	0	-	80093022	80093022	0	2	300,239,	0,635,
LjG1.1_chr2	80092148	80093022	NOV.11254.12	0	-	80093022	80093022	0	2	344,302,	0,572,
LjG1.1_chr2	80092162	80093023	NOV.11254.13	0	-	80093023	80093023	0	2	470,238,	0,623,
LjG1.1_chr2	80092163	80093016	NOV.11254.14	0	-	80093016	80093016	0	2	455,209,	0,644,
LjG1.1_chr2	79953419	80002063	NOV.11254.2	0	-	80002063	80002063	0	3	26,559,11,	0,7084,48633,
LjG1.1_chr2	79953419	80002063	NOV.11254.2	0	-	80002063	80002063	0	3	26,559,11,	0,7084,48633,
LjG1.1_chr2	79953419	80002063	NOV.11254.2	0	-	80002063	80002063	0	3	26,559,11,	0,7084,48633,
LjG1.1_chr2	80000126	80121840	NOV.11254.6	0	-	80121840	80121840	0	3	14,436,10,	0,92036,121704,
LjG1.1_chr2	80000126	80121840	NOV.11254.6	0	-	80121840	80121840	0	3	14,436,10,	0,92036,121704,
LjG1.1_chr2	80000126	80121840	NOV.11254.6	0	-	80121840	80121840	0	3	14,436,10,	0,92036,121704,
LjG1.1_chr2	80000126	80121840	NOV.11254.6	0	-	80121840	80121840	0	3	14,436,10,	0,92036,121704,
LjG1.1_chr2	80091897	80093059	NOV.11254.7	0	-	80093059	80093059	0	2	751,93,	0,1069,
LjG1.1_chr2	80091929	80093055	NOV.11254.8	0	-	80093055	80093055	0	2	575,320,	0,806,
LjG1.1_chr2	80091929	80093055	NOV.11254.9	0	-	80093055	80093055	0	2	648,295,	0,831,
LjG1.1_chr2	79955776	79958700	NOV.11255.2	0	+	79958700	79958700	0	2	33,352,	0,2572,
LjG1.1_chr2	80190538	80190740	NOV.11271.1	0	+	80190740	80190740	0	1	202,	0,
LjG1.1_chr2	80326961	80422788	NOV.11284.6	0	-	80422788	80422788	0	2	156,173,	0,95654,
LjG1.1_chr2	80326961	80422788	NOV.11284.6	0	-	80422788	80422788	0	2	156,173,	0,95654,
LjG1.1_chr2	80326961	80422788	NOV.11284.6	0	-	80422788	80422788	0	2	156,173,	0,95654,
LjG1.1_chr2	80326961	80422788	NOV.11284.6	0	-	80422788	80422788	0	2	156,173,	0,95654,
LjG1.1_chr2	80326961	80422788	NOV.11284.6	0	-	80422788	80422788	0	2	156,173,	0,95654,
LjG1.1_chr2	80337371	80337578	NOV.11287.1	0	+	80337578	80337578	0	1	207,	0,
LjG1.1_chr2	80337371	80337578	NOV.11287.1	0	+	80337578	80337578	0	1	207,	0,
LjG1.1_chr2	80907268	80908340	NOV.11288.2	0	-	80908340	80908340	0	2	353,129,	0,943,
LjG1.1_chr2	80907296	80908100	NOV.11288.3	0	-	80908100	80908100	0	2	290,75,	0,729,
LjG1.1_chr2	80473284	80713217	NOV.11299.1	0	-	80713217	80713217	0	3	42,397,23,	0,230330,239910,
LjG1.1_chr2	80473284	80713217	NOV.11299.1	0	-	80713217	80713217	0	3	42,397,23,	0,230330,239910,
LjG1.1_chr2	80473284	80713217	NOV.11299.1	0	-	80713217	80713217	0	3	42,397,23,	0,230330,239910,
LjG1.1_chr2	80473284	80713217	NOV.11299.1	0	-	80713217	80713217	0	3	42,397,23,	0,230330,239910,
LjG1.1_chr2	80473284	80713217	NOV.11299.1	0	-	80713217	80713217	0	3	42,397,23,	0,230330,239910,
LjG1.1_chr2	80473284	80713217	NOV.11299.1	0	-	80713217	80713217	0	3	42,397,23,	0,230330,239910,
LjG1.1_chr2	80473284	80713217	NOV.11299.1	0	-	80713217	80713217	0	3	42,397,23,	0,230330,239910,
LjG1.1_chr2	80473284	80713217	NOV.11299.1	0	-	80713217	80713217	0	3	42,397,23,	0,230330,239910,
LjG1.1_chr2	80473284	80713217	NOV.11299.1	0	-	80713217	80713217	0	3	42,397,23,	0,230330,239910,
LjG1.1_chr2	80473284	80713217	NOV.11299.1	0	-	80713217	80713217	0	3	42,397,23,	0,230330,239910,
LjG1.1_chr2	80515204	80515993	NOV.11304.1	0	+	80515993	80515993	0	1	789,	0,
LjG1.1_chr2	80575341	80651497	NOV.11309.2	0	+	80651497	80651497	0	2	12,489,	0,75667,
LjG1.1_chr2	80575341	80651497	NOV.11309.2	0	+	80651497	80651497	0	2	12,489,	0,75667,
LjG1.1_chr2	80575341	80651497	NOV.11309.2	0	+	80651497	80651497	0	2	12,489,	0,75667,
LjG1.1_chr2	80575341	80651497	NOV.11309.2	0	+	80651497	80651497	0	2	12,489,	0,75667,
LjG1.1_chr2	80754348	80797347	NOV.11327.1	0	-	80797347	80797347	0	5	17,324,95,59,152,	0,41651,42060,42640,42847,
LjG1.1_chr2	80754348	80797347	NOV.11327.1	0	-	80797347	80797347	0	5	17,324,95,59,152,	0,41651,42060,42640,42847,
LjG1.1_chr2	80754348	80797347	NOV.11327.1	0	-	80797347	80797347	0	5	17,324,95,59,152,	0,41651,42060,42640,42847,
LjG1.1_chr2	80810495	80811991	NOV.11333.1	0	-	80811991	80811991	0	2	36,262,	0,1234,
LjG1.1_chr2	80874627	80875202	NOV.11340.1	0	+	80875202	80875202	0	1	575,	0,
LjG1.1_chr1	14737989	14738221	NOV.1134.1	0	-	14738221	14738221	0	1	232,	0,
LjG1.1_chr2	80932522	80933724	NOV.11346.1	0	-	80933724	80933724	0	1	1202,	0,
LjG1.1_chr2	80932522	80933668	NOV.11346.2	0	-	80933668	80933668	0	2	755,117,	0,1029,
LjG1.1_chr2	81014354	81014981	NOV.11354.1	0	+	81014981	81014981	0	1	627,	0,
LjG1.1_chr1	14777687	14824895	NOV.1135.6	0	+	14824895	14824895	0	3	26,594,18,	0,886,47190,
LjG1.1_chr2	81171097	81171464	NOV.11372.1	0	-	81171464	81171464	0	1	367,	0,
LjG1.1_chr2	81406014	81431001	NOV.11383.4	0	+	81431001	81431001	0	4	91,44,267,20,	0,299,640,24967,
LjG1.1_chr2	81406014	81431002	NOV.11383.6	0	+	81431002	81431002	0	4	91,44,241,19,	0,299,640,24969,
LjG1.1_chr2	81535490	81538906	NOV.11393.4	0	+	81538906	81538906	0	4	313,100,46,796,	0,487,2118,2620,
LjG1.1_chr2	81535781	81539063	NOV.11393.5	0	+	81539063	81539063	0	5	17,100,46,133,556,	0,196,1827,2329,2726,
LjG1.1_chr2	81660735	81661296	NOV.11409.1	0	+	81661296	81661296	0	1	561,	0,
LjG1.1_chr2	82110386	82200969	NOV.11449.1	0	+	82200969	82200969	0	5	162,118,63,454,15,	0,873,1154,1494,90568,
LjG1.1_chr2	82110386	82200969	NOV.11449.1	0	+	82200969	82200969	0	5	162,118,63,454,15,	0,873,1154,1494,90568,
LjG1.1_chr2	82124557	82225401	NOV.11451.1	0	-	82225401	82225401	0	3	94,258,123,	0,97928,100721,
LjG1.1_chr2	82124557	82225401	NOV.11451.1	0	-	82225401	82225401	0	3	94,258,123,	0,97928,100721,
LjG1.1_chr2	82124557	82225401	NOV.11451.1	0	-	82225401	82225401	0	3	94,258,123,	0,97928,100721,
LjG1.1_chr2	82124557	82225401	NOV.11451.1	0	-	82225401	82225401	0	3	94,258,123,	0,97928,100721,
LjG1.1_chr2	82124557	82225401	NOV.11451.1	0	-	82225401	82225401	0	3	94,258,123,	0,97928,100721,
LjG1.1_chr2	82124557	82225401	NOV.11451.1	0	-	82225401	82225401	0	3	94,258,123,	0,97928,100721,
LjG1.1_chr2	82124557	82225401	NOV.11451.1	0	-	82225401	82225401	0	3	94,258,123,	0,97928,100721,
LjG1.1_chr2	82124557	82225401	NOV.11451.1	0	-	82225401	82225401	0	3	94,258,123,	0,97928,100721,
LjG1.1_chr2	82124557	82225401	NOV.11451.1	0	-	82225401	82225401	0	3	94,258,123,	0,97928,100721,
LjG1.1_chr2	82124557	82225401	NOV.11451.1	0	-	82225401	82225401	0	3	94,258,123,	0,97928,100721,
LjG1.1_chr2	82124557	82225401	NOV.11451.1	0	-	82225401	82225401	0	3	94,258,123,	0,97928,100721,
LjG1.1_chr2	82124867	82225401	NOV.11451.10	0	-	82225401	82225401	0	3	34,258,123,	0,97618,100411,
LjG1.1_chr2	82124867	82225401	NOV.11451.10	0	-	82225401	82225401	0	3	34,258,123,	0,97618,100411,
LjG1.1_chr2	82124867	82225401	NOV.11451.10	0	-	82225401	82225401	0	3	34,258,123,	0,97618,100411,
LjG1.1_chr2	82124867	82225401	NOV.11451.10	0	-	82225401	82225401	0	3	34,258,123,	0,97618,100411,
LjG1.1_chr2	82124867	82225401	NOV.11451.10	0	-	82225401	82225401	0	3	34,258,123,	0,97618,100411,
LjG1.1_chr2	82163492	82225401	NOV.11451.12	0	-	82225401	82225401	0	3	15,252,123,	0,58999,61786,
LjG1.1_chr2	82163492	82225401	NOV.11451.12	0	-	82225401	82225401	0	3	15,252,123,	0,58999,61786,
LjG1.1_chr2	82163492	82225401	NOV.11451.12	0	-	82225401	82225401	0	3	15,252,123,	0,58999,61786,
LjG1.1_chr2	82170475	82225401	NOV.11451.13	0	-	82225401	82225401	0	3	22,252,123,	0,52016,54803,
LjG1.1_chr2	82170475	82225401	NOV.11451.13	0	-	82225401	82225401	0	3	22,252,123,	0,52016,54803,
LjG1.1_chr2	82170475	82225401	NOV.11451.13	0	-	82225401	82225401	0	3	22,252,123,	0,52016,54803,
LjG1.1_chr2	82124630	82225401	NOV.11451.3	0	-	82225401	82225401	0	3	21,289,123,	0,97824,100648,
LjG1.1_chr2	82124630	82225401	NOV.11451.3	0	-	82225401	82225401	0	3	21,289,123,	0,97824,100648,
LjG1.1_chr2	82124630	82225401	NOV.11451.3	0	-	82225401	82225401	0	3	21,289,123,	0,97824,100648,
LjG1.1_chr2	82124630	82225401	NOV.11451.3	0	-	82225401	82225401	0	3	21,289,123,	0,97824,100648,
LjG1.1_chr2	82124630	82225401	NOV.11451.3	0	-	82225401	82225401	0	3	21,289,123,	0,97824,100648,
LjG1.1_chr2	82124632	82225401	NOV.11451.4	0	-	82225401	82225401	0	3	19,242,123,	0,97869,100646,
LjG1.1_chr2	82124632	82225401	NOV.11451.4	0	-	82225401	82225401	0	3	19,242,123,	0,97869,100646,
LjG1.1_chr2	82124632	82225401	NOV.11451.4	0	-	82225401	82225401	0	3	19,242,123,	0,97869,100646,
LjG1.1_chr2	82124632	82225401	NOV.11451.4	0	-	82225401	82225401	0	3	19,242,123,	0,97869,100646,
LjG1.1_chr2	82124632	82225401	NOV.11451.4	0	-	82225401	82225401	0	3	19,242,123,	0,97869,100646,
LjG1.1_chr2	82124832	82225401	NOV.11451.5	0	-	82225401	82225401	0	3	71,258,123,	0,97653,100446,
LjG1.1_chr2	82124832	82225401	NOV.11451.5	0	-	82225401	82225401	0	3	71,258,123,	0,97653,100446,
LjG1.1_chr2	82124832	82225401	NOV.11451.5	0	-	82225401	82225401	0	3	71,258,123,	0,97653,100446,
LjG1.1_chr2	82124832	82225401	NOV.11451.5	0	-	82225401	82225401	0	3	71,258,123,	0,97653,100446,
LjG1.1_chr2	82124832	82225401	NOV.11451.5	0	-	82225401	82225401	0	3	71,258,123,	0,97653,100446,
LjG1.1_chr2	82124832	82225401	NOV.11451.5	0	-	82225401	82225401	0	3	71,258,123,	0,97653,100446,
LjG1.1_chr2	82124832	82225401	NOV.11451.5	0	-	82225401	82225401	0	3	71,258,123,	0,97653,100446,
LjG1.1_chr2	82124832	82225401	NOV.11451.5	0	-	82225401	82225401	0	3	71,258,123,	0,97653,100446,
LjG1.1_chr2	82124832	82225401	NOV.11451.5	0	-	82225401	82225401	0	3	71,258,123,	0,97653,100446,
LjG1.1_chr2	82124832	82225401	NOV.11451.5	0	-	82225401	82225401	0	3	71,258,123,	0,97653,100446,
LjG1.1_chr2	82124832	82225401	NOV.11451.5	0	-	82225401	82225401	0	3	71,258,123,	0,97653,100446,
LjG1.1_chr2	82124832	82225401	NOV.11451.6	0	-	82225401	82225401	0	3	69,261,123,	0,97650,100446,
LjG1.1_chr2	82124832	82225401	NOV.11451.6	0	-	82225401	82225401	0	3	69,261,123,	0,97650,100446,
LjG1.1_chr2	82124832	82225401	NOV.11451.6	0	-	82225401	82225401	0	3	69,261,123,	0,97650,100446,
LjG1.1_chr2	82124832	82225401	NOV.11451.6	0	-	82225401	82225401	0	3	69,261,123,	0,97650,100446,
LjG1.1_chr2	82124832	82225401	NOV.11451.6	0	-	82225401	82225401	0	3	69,261,123,	0,97650,100446,
LjG1.1_chr2	82124832	82225401	NOV.11451.6	0	-	82225401	82225401	0	3	69,261,123,	0,97650,100446,
LjG1.1_chr2	82124832	82225401	NOV.11451.6	0	-	82225401	82225401	0	3	69,261,123,	0,97650,100446,
LjG1.1_chr2	82124832	82225401	NOV.11451.6	0	-	82225401	82225401	0	3	69,261,123,	0,97650,100446,
LjG1.1_chr2	82124832	82225401	NOV.11451.6	0	-	82225401	82225401	0	3	69,261,123,	0,97650,100446,
LjG1.1_chr2	82124832	82225401	NOV.11451.6	0	-	82225401	82225401	0	3	69,261,123,	0,97650,100446,
LjG1.1_chr2	82124832	82225401	NOV.11451.7	0	-	82225401	82225401	0	3	68,261,123,	0,97650,100446,
LjG1.1_chr2	82124832	82225401	NOV.11451.7	0	-	82225401	82225401	0	3	68,261,123,	0,97650,100446,
LjG1.1_chr2	82124832	82225401	NOV.11451.7	0	-	82225401	82225401	0	3	68,261,123,	0,97650,100446,
LjG1.1_chr2	82124832	82225401	NOV.11451.7	0	-	82225401	82225401	0	3	68,261,123,	0,97650,100446,
LjG1.1_chr2	82124832	82225401	NOV.11451.7	0	-	82225401	82225401	0	3	68,261,123,	0,97650,100446,
LjG1.1_chr2	82124832	82225401	NOV.11451.7	0	-	82225401	82225401	0	3	68,261,123,	0,97650,100446,
LjG1.1_chr2	82124832	82225401	NOV.11451.7	0	-	82225401	82225401	0	3	68,261,123,	0,97650,100446,
LjG1.1_chr2	82124832	82225401	NOV.11451.7	0	-	82225401	82225401	0	3	68,261,123,	0,97650,100446,
LjG1.1_chr2	82124832	82225401	NOV.11451.7	0	-	82225401	82225401	0	3	68,261,123,	0,97650,100446,
LjG1.1_chr2	82124832	82225401	NOV.11451.7	0	-	82225401	82225401	0	3	68,261,123,	0,97650,100446,
LjG1.1_chr2	82124832	82222745	NOV.11451.8	0	-	82222745	82222745	0	2	69,308,	0,97605,
LjG1.1_chr2	82124832	82222745	NOV.11451.8	0	-	82222745	82222745	0	2	69,308,	0,97605,
LjG1.1_chr2	82124832	82222745	NOV.11451.8	0	-	82222745	82222745	0	2	69,308,	0,97605,
LjG1.1_chr2	82124832	82222745	NOV.11451.8	0	-	82222745	82222745	0	2	69,308,	0,97605,
LjG1.1_chr2	82124832	82222745	NOV.11451.8	0	-	82222745	82222745	0	2	69,308,	0,97605,
LjG1.1_chr2	82124832	82222745	NOV.11451.8	0	-	82222745	82222745	0	2	69,308,	0,97605,
LjG1.1_chr2	82124832	82222745	NOV.11451.8	0	-	82222745	82222745	0	2	69,308,	0,97605,
LjG1.1_chr2	82124832	82222745	NOV.11451.8	0	-	82222745	82222745	0	2	69,308,	0,97605,
LjG1.1_chr2	82124832	82222745	NOV.11451.8	0	-	82222745	82222745	0	2	69,308,	0,97605,
LjG1.1_chr2	82124832	82222745	NOV.11451.8	0	-	82222745	82222745	0	2	69,308,	0,97605,
LjG1.1_chr2	82124832	82222745	NOV.11451.8	0	-	82222745	82222745	0	2	69,308,	0,97605,
LjG1.1_chr2	82218396	82260690	NOV.11455.7	0	+	82260690	82260690	0	3	34,603,17,	0,1289,42277,
LjG1.1_chr2	82218396	82260690	NOV.11455.7	0	+	82260690	82260690	0	3	34,603,17,	0,1289,42277,
LjG1.1_chr2	82359731	82360366	NOV.11474.1	0	-	82360366	82360366	0	1	635,	0,
LjG1.1_chr2	82415282	82415787	NOV.11480.1	0	-	82415787	82415787	0	1	505,	0,
LjG1.1_chr2	82417117	82418068	NOV.11481.1	0	-	82418068	82418068	0	1	951,	0,
LjG1.1_chr2	82418824	82419921	NOV.11482.1	0	-	82419921	82419921	0	2	284,316,	0,781,
LjG1.1_chr2	82491812	82492578	NOV.11487.1	0	-	82492578	82492578	0	1	766,	0,
LjG1.1_chr2	82491812	82492578	NOV.11487.1	0	-	82492578	82492578	0	1	766,	0,
LjG1.1_chr2	82494508	82495588	NOV.11488.1	0	-	82495588	82495588	0	2	256,105,	0,975,
LjG1.1_chr1	15002879	15003504	NOV.1149.1	0	-	15003504	15003504	0	1	625,	0,
LjG1.1_chr2	82582913	82597192	NOV.11495.2	0	-	82597192	82597192	0	3	424,137,36,	0,508,14243,
LjG1.1_chr2	82612992	82617962	NOV.11498.1	0	+	82617962	82617962	0	2	18,196,	0,4774,
LjG1.1_chr2	82666441	82667274	NOV.11503.1	0	+	82667274	82667274	0	1	833,	0,
LjG1.1_chr2	82786117	82786618	NOV.11520.1	0	+	82786618	82786618	0	1	501,	0,
LjG1.1_chr2	82793082	82793858	NOV.11522.1	0	+	82793858	82793858	0	1	776,	0,
LjG1.1_chr2	82802419	82802677	NOV.11525.1	0	-	82802677	82802677	0	1	258,	0,
LjG1.1_chr2	82977549	83202987	NOV.11539.12	0	-	83202987	83202987	0	6	33,490,90,32,60,103,	0,222215,222795,223395,224619,225335,
LjG1.1_chr2	82977549	83202987	NOV.11539.12	0	-	83202987	83202987	0	6	33,490,90,32,60,103,	0,222215,222795,223395,224619,225335,
LjG1.1_chr2	82977549	83202987	NOV.11539.12	0	-	83202987	83202987	0	6	33,490,90,32,60,103,	0,222215,222795,223395,224619,225335,
LjG1.1_chr2	82977549	83202987	NOV.11539.12	0	-	83202987	83202987	0	6	33,490,90,32,60,103,	0,222215,222795,223395,224619,225335,
LjG1.1_chr2	82977549	83202987	NOV.11539.12	0	-	83202987	83202987	0	6	33,490,90,32,60,103,	0,222215,222795,223395,224619,225335,
LjG1.1_chr2	82977549	83202987	NOV.11539.12	0	-	83202987	83202987	0	6	33,490,90,32,60,103,	0,222215,222795,223395,224619,225335,
LjG1.1_chr2	82977549	83202987	NOV.11539.12	0	-	83202987	83202987	0	6	33,490,90,32,60,103,	0,222215,222795,223395,224619,225335,
LjG1.1_chr2	82977549	83202987	NOV.11539.12	0	-	83202987	83202987	0	6	33,490,90,32,60,103,	0,222215,222795,223395,224619,225335,
LjG1.1_chr2	82977549	83202987	NOV.11539.12	0	-	83202987	83202987	0	6	33,490,90,32,60,103,	0,222215,222795,223395,224619,225335,
LjG1.1_chr2	82977549	83202987	NOV.11539.12	0	-	83202987	83202987	0	6	33,490,90,32,60,103,	0,222215,222795,223395,224619,225335,
LjG1.1_chr2	82977549	83202987	NOV.11539.12	0	-	83202987	83202987	0	6	33,490,90,32,60,103,	0,222215,222795,223395,224619,225335,
LjG1.1_chr2	82977549	83202987	NOV.11539.12	0	-	83202987	83202987	0	6	33,490,90,32,60,103,	0,222215,222795,223395,224619,225335,
LjG1.1_chr2	82977549	83202987	NOV.11539.12	0	-	83202987	83202987	0	6	33,490,90,32,60,103,	0,222215,222795,223395,224619,225335,
LjG1.1_chr2	82977549	83202987	NOV.11539.12	0	-	83202987	83202987	0	6	33,490,90,32,60,103,	0,222215,222795,223395,224619,225335,
LjG1.1_chr2	82977549	83202987	NOV.11539.12	0	-	83202987	83202987	0	6	33,490,90,32,60,103,	0,222215,222795,223395,224619,225335,
LjG1.1_chr2	82977549	83202987	NOV.11539.12	0	-	83202987	83202987	0	6	33,490,90,32,60,103,	0,222215,222795,223395,224619,225335,
LjG1.1_chr2	82977549	83202987	NOV.11539.12	0	-	83202987	83202987	0	6	33,490,90,32,60,103,	0,222215,222795,223395,224619,225335,
LjG1.1_chr2	82977549	83173386	NOV.11539.17	0	-	83173386	83173386	0	2	33,483,	0,195354,
LjG1.1_chr2	82977549	83173386	NOV.11539.17	0	-	83173386	83173386	0	2	33,483,	0,195354,
LjG1.1_chr2	82977549	83173386	NOV.11539.17	0	-	83173386	83173386	0	2	33,483,	0,195354,
LjG1.1_chr2	82977549	83173386	NOV.11539.17	0	-	83173386	83173386	0	2	33,483,	0,195354,
LjG1.1_chr2	82977549	83173386	NOV.11539.17	0	-	83173386	83173386	0	2	33,483,	0,195354,
LjG1.1_chr2	82977549	83173386	NOV.11539.17	0	-	83173386	83173386	0	2	33,483,	0,195354,
LjG1.1_chr2	82977549	83173386	NOV.11539.17	0	-	83173386	83173386	0	2	33,483,	0,195354,
LjG1.1_chr2	82977549	83173386	NOV.11539.17	0	-	83173386	83173386	0	2	33,483,	0,195354,
LjG1.1_chr2	82977549	83173386	NOV.11539.17	0	-	83173386	83173386	0	2	33,483,	0,195354,
LjG1.1_chr2	82977549	83173386	NOV.11539.17	0	-	83173386	83173386	0	2	33,483,	0,195354,
LjG1.1_chr2	82977549	83173386	NOV.11539.17	0	-	83173386	83173386	0	2	33,483,	0,195354,
LjG1.1_chr2	82977549	83173386	NOV.11539.17	0	-	83173386	83173386	0	2	33,483,	0,195354,
LjG1.1_chr2	82977549	83173376	NOV.11539.18	0	-	83173376	83173376	0	2	33,551,	0,195276,
LjG1.1_chr2	82977549	83173376	NOV.11539.18	0	-	83173376	83173376	0	2	33,551,	0,195276,
LjG1.1_chr2	82977549	83173376	NOV.11539.18	0	-	83173376	83173376	0	2	33,551,	0,195276,
LjG1.1_chr2	82977549	83173376	NOV.11539.18	0	-	83173376	83173376	0	2	33,551,	0,195276,
LjG1.1_chr2	82977549	83173376	NOV.11539.18	0	-	83173376	83173376	0	2	33,551,	0,195276,
LjG1.1_chr2	82977549	83173376	NOV.11539.18	0	-	83173376	83173376	0	2	33,551,	0,195276,
LjG1.1_chr2	82977549	83173376	NOV.11539.18	0	-	83173376	83173376	0	2	33,551,	0,195276,
LjG1.1_chr2	82977549	83173376	NOV.11539.18	0	-	83173376	83173376	0	2	33,551,	0,195276,
LjG1.1_chr2	82977549	83173376	NOV.11539.18	0	-	83173376	83173376	0	2	33,551,	0,195276,
LjG1.1_chr2	82977549	83173376	NOV.11539.18	0	-	83173376	83173376	0	2	33,551,	0,195276,
LjG1.1_chr2	82977549	83173376	NOV.11539.18	0	-	83173376	83173376	0	2	33,551,	0,195276,
LjG1.1_chr2	82977549	83173376	NOV.11539.18	0	-	83173376	83173376	0	2	33,551,	0,195276,
LjG1.1_chr2	82977549	83173376	NOV.11539.18	0	-	83173376	83173376	0	2	33,551,	0,195276,
LjG1.1_chr2	82977549	83293447	NOV.11539.20	0	-	83293447	83293447	0	2	33,179,	0,315719,
LjG1.1_chr2	82977549	83293447	NOV.11539.20	0	-	83293447	83293447	0	2	33,179,	0,315719,
LjG1.1_chr2	82977549	83293447	NOV.11539.20	0	-	83293447	83293447	0	2	33,179,	0,315719,
LjG1.1_chr2	82977549	83293447	NOV.11539.20	0	-	83293447	83293447	0	2	33,179,	0,315719,
LjG1.1_chr2	82977549	83293447	NOV.11539.20	0	-	83293447	83293447	0	2	33,179,	0,315719,
LjG1.1_chr2	82977549	83293447	NOV.11539.20	0	-	83293447	83293447	0	2	33,179,	0,315719,
LjG1.1_chr2	82977549	83293447	NOV.11539.20	0	-	83293447	83293447	0	2	33,179,	0,315719,
LjG1.1_chr2	82977549	83293447	NOV.11539.20	0	-	83293447	83293447	0	2	33,179,	0,315719,
LjG1.1_chr2	82977549	83293447	NOV.11539.20	0	-	83293447	83293447	0	2	33,179,	0,315719,
LjG1.1_chr2	82977549	83293447	NOV.11539.20	0	-	83293447	83293447	0	2	33,179,	0,315719,
LjG1.1_chr2	82977549	83293447	NOV.11539.20	0	-	83293447	83293447	0	2	33,179,	0,315719,
LjG1.1_chr2	82977549	83293447	NOV.11539.20	0	-	83293447	83293447	0	2	33,179,	0,315719,
LjG1.1_chr2	82977549	83293447	NOV.11539.20	0	-	83293447	83293447	0	2	33,179,	0,315719,
LjG1.1_chr2	82977549	83293447	NOV.11539.20	0	-	83293447	83293447	0	2	33,179,	0,315719,
LjG1.1_chr2	82977549	83293447	NOV.11539.20	0	-	83293447	83293447	0	2	33,179,	0,315719,
LjG1.1_chr2	82977549	83293447	NOV.11539.20	0	-	83293447	83293447	0	2	33,179,	0,315719,
LjG1.1_chr2	82977549	83293447	NOV.11539.20	0	-	83293447	83293447	0	2	33,179,	0,315719,
LjG1.1_chr2	82977549	83293447	NOV.11539.20	0	-	83293447	83293447	0	2	33,179,	0,315719,
LjG1.1_chr2	82977549	83293447	NOV.11539.20	0	-	83293447	83293447	0	2	33,179,	0,315719,
LjG1.1_chr2	82977549	83293447	NOV.11539.20	0	-	83293447	83293447	0	2	33,179,	0,315719,
LjG1.1_chr2	82977549	83293447	NOV.11539.20	0	-	83293447	83293447	0	2	33,179,	0,315719,
LjG1.1_chr2	82977549	83126644	NOV.11539.21	0	-	83126644	83126644	0	5	34,598,45,58,169,	0,147885,148576,148721,148926,
LjG1.1_chr2	82977549	83126644	NOV.11539.21	0	-	83126644	83126644	0	5	34,598,45,58,169,	0,147885,148576,148721,148926,
LjG1.1_chr2	82977549	83126644	NOV.11539.21	0	-	83126644	83126644	0	5	34,598,45,58,169,	0,147885,148576,148721,148926,
LjG1.1_chr2	82977549	83126644	NOV.11539.21	0	-	83126644	83126644	0	5	34,598,45,58,169,	0,147885,148576,148721,148926,
LjG1.1_chr2	82977549	83126644	NOV.11539.21	0	-	83126644	83126644	0	5	34,598,45,58,169,	0,147885,148576,148721,148926,
LjG1.1_chr2	82977549	83126644	NOV.11539.21	0	-	83126644	83126644	0	5	34,598,45,58,169,	0,147885,148576,148721,148926,
LjG1.1_chr2	82977549	83126644	NOV.11539.21	0	-	83126644	83126644	0	5	34,598,45,58,169,	0,147885,148576,148721,148926,
LjG1.1_chr2	82977549	83126644	NOV.11539.21	0	-	83126644	83126644	0	5	34,598,45,58,169,	0,147885,148576,148721,148926,
LjG1.1_chr2	82977549	83126644	NOV.11539.21	0	-	83126644	83126644	0	5	34,598,45,58,169,	0,147885,148576,148721,148926,
LjG1.1_chr2	82977549	83126644	NOV.11539.21	0	-	83126644	83126644	0	5	34,598,45,58,169,	0,147885,148576,148721,148926,
LjG1.1_chr2	82977551	83176220	NOV.11539.28	0	-	83176220	83176220	0	5	31,572,67,93,16,	0,195282,196376,198177,198653,
LjG1.1_chr2	82977551	83176220	NOV.11539.28	0	-	83176220	83176220	0	5	31,572,67,93,16,	0,195282,196376,198177,198653,
LjG1.1_chr2	82977551	83176220	NOV.11539.28	0	-	83176220	83176220	0	5	31,572,67,93,16,	0,195282,196376,198177,198653,
LjG1.1_chr2	82977551	83176220	NOV.11539.28	0	-	83176220	83176220	0	5	31,572,67,93,16,	0,195282,196376,198177,198653,
LjG1.1_chr2	82977551	83176220	NOV.11539.28	0	-	83176220	83176220	0	5	31,572,67,93,16,	0,195282,196376,198177,198653,
LjG1.1_chr2	82977551	83176220	NOV.11539.28	0	-	83176220	83176220	0	5	31,572,67,93,16,	0,195282,196376,198177,198653,
LjG1.1_chr2	82977551	83176220	NOV.11539.28	0	-	83176220	83176220	0	5	31,572,67,93,16,	0,195282,196376,198177,198653,
LjG1.1_chr2	82977551	83176220	NOV.11539.28	0	-	83176220	83176220	0	5	31,572,67,93,16,	0,195282,196376,198177,198653,
LjG1.1_chr2	82977551	83176220	NOV.11539.28	0	-	83176220	83176220	0	5	31,572,67,93,16,	0,195282,196376,198177,198653,
LjG1.1_chr2	82977551	83176220	NOV.11539.28	0	-	83176220	83176220	0	5	31,572,67,93,16,	0,195282,196376,198177,198653,
LjG1.1_chr2	82977551	83176220	NOV.11539.28	0	-	83176220	83176220	0	5	31,572,67,93,16,	0,195282,196376,198177,198653,
LjG1.1_chr2	82977551	83176220	NOV.11539.28	0	-	83176220	83176220	0	5	31,572,67,93,16,	0,195282,196376,198177,198653,
LjG1.1_chr2	82977551	83176220	NOV.11539.28	0	-	83176220	83176220	0	5	31,572,67,93,16,	0,195282,196376,198177,198653,
LjG1.1_chr2	82977548	83175799	NOV.11539.8	0	-	83175799	83175799	0	4	36,549,67,71,	0,195308,196379,198180,
LjG1.1_chr2	82977548	83175799	NOV.11539.8	0	-	83175799	83175799	0	4	36,549,67,71,	0,195308,196379,198180,
LjG1.1_chr2	82977548	83175799	NOV.11539.8	0	-	83175799	83175799	0	4	36,549,67,71,	0,195308,196379,198180,
LjG1.1_chr2	82977548	83175799	NOV.11539.8	0	-	83175799	83175799	0	4	36,549,67,71,	0,195308,196379,198180,
LjG1.1_chr2	82977548	83175799	NOV.11539.8	0	-	83175799	83175799	0	4	36,549,67,71,	0,195308,196379,198180,
LjG1.1_chr2	82977548	83175799	NOV.11539.8	0	-	83175799	83175799	0	4	36,549,67,71,	0,195308,196379,198180,
LjG1.1_chr2	82977548	83175799	NOV.11539.8	0	-	83175799	83175799	0	4	36,549,67,71,	0,195308,196379,198180,
LjG1.1_chr2	82977548	83175799	NOV.11539.8	0	-	83175799	83175799	0	4	36,549,67,71,	0,195308,196379,198180,
LjG1.1_chr2	82977548	83175799	NOV.11539.8	0	-	83175799	83175799	0	4	36,549,67,71,	0,195308,196379,198180,
LjG1.1_chr2	82977548	83175799	NOV.11539.8	0	-	83175799	83175799	0	4	36,549,67,71,	0,195308,196379,198180,
LjG1.1_chr2	82977548	83175799	NOV.11539.8	0	-	83175799	83175799	0	4	36,549,67,71,	0,195308,196379,198180,
LjG1.1_chr2	82977548	83175799	NOV.11539.8	0	-	83175799	83175799	0	4	36,549,67,71,	0,195308,196379,198180,
LjG1.1_chr2	82977548	83175799	NOV.11539.8	0	-	83175799	83175799	0	4	36,549,67,71,	0,195308,196379,198180,
LjG1.1_chr2	83258866	83333299	NOV.11563.7	0	+	83333299	83333299	0	3	286,620,15,	0,1086,74418,
LjG1.1_chr2	83258866	83333299	NOV.11563.7	0	+	83333299	83333299	0	3	286,620,15,	0,1086,74418,
LjG1.1_chr2	83258866	83333299	NOV.11563.7	0	+	83333299	83333299	0	3	286,620,15,	0,1086,74418,
LjG1.1_chr2	83258866	83333299	NOV.11563.7	0	+	83333299	83333299	0	3	286,620,15,	0,1086,74418,
LjG1.1_chr2	83258866	83333299	NOV.11563.7	0	+	83333299	83333299	0	3	286,620,15,	0,1086,74418,
LjG1.1_chr2	85658272	85746173	NOV.11588.1	0	-	85746173	85746173	0	4	16,311,108,21,	0,86710,87647,87880,
LjG1.1_chr2	85658272	85746173	NOV.11588.1	0	-	85746173	85746173	0	4	16,311,108,21,	0,86710,87647,87880,
LjG1.1_chr2	85708669	85960690	NOV.11588.11	0	-	85960690	85960690	0	2	25,677,	0,251344,
LjG1.1_chr2	85708669	85960690	NOV.11588.11	0	-	85960690	85960690	0	2	25,677,	0,251344,
LjG1.1_chr2	85708669	85960690	NOV.11588.11	0	-	85960690	85960690	0	2	25,677,	0,251344,
LjG1.1_chr2	85708669	85960690	NOV.11588.11	0	-	85960690	85960690	0	2	25,677,	0,251344,
LjG1.1_chr2	85708669	85960690	NOV.11588.11	0	-	85960690	85960690	0	2	25,677,	0,251344,
LjG1.1_chr2	85708669	85960690	NOV.11588.11	0	-	85960690	85960690	0	2	25,677,	0,251344,
LjG1.1_chr2	85708669	85960690	NOV.11588.11	0	-	85960690	85960690	0	2	25,677,	0,251344,
LjG1.1_chr2	85708669	85960690	NOV.11588.11	0	-	85960690	85960690	0	2	25,677,	0,251344,
LjG1.1_chr2	85941395	85960469	NOV.11588.16	0	-	85960469	85960469	0	2	18,458,	0,18616,
LjG1.1_chr2	86173367	86247259	NOV.11588.18	0	-	86247259	86247259	0	5	12,73,175,130,64,	0,73109,73294,73574,73828,
LjG1.1_chr2	86173367	86247259	NOV.11588.18	0	-	86247259	86247259	0	5	12,73,175,130,64,	0,73109,73294,73574,73828,
LjG1.1_chr2	86173367	86247259	NOV.11588.18	0	-	86247259	86247259	0	5	12,73,175,130,64,	0,73109,73294,73574,73828,
LjG1.1_chr2	86173367	86247259	NOV.11588.18	0	-	86247259	86247259	0	5	12,73,175,130,64,	0,73109,73294,73574,73828,
LjG1.1_chr2	86173367	86247259	NOV.11588.18	0	-	86247259	86247259	0	5	12,73,175,130,64,	0,73109,73294,73574,73828,
LjG1.1_chr2	86173367	86247259	NOV.11588.18	0	-	86247259	86247259	0	5	12,73,175,130,64,	0,73109,73294,73574,73828,
LjG1.1_chr2	86173367	86247259	NOV.11588.18	0	-	86247259	86247259	0	5	12,73,175,130,64,	0,73109,73294,73574,73828,
LjG1.1_chr2	85701970	85746173	NOV.11588.2	0	-	85746173	85746173	0	4	20,319,108,21,	0,43004,43949,44182,
LjG1.1_chr2	86196774	86246138	NOV.11588.27	0	-	86246138	86246138	0	6	18,202,59,103,18,54,	0,48259,48550,48731,48924,49310,
LjG1.1_chr2	86196774	86246138	NOV.11588.27	0	-	86246138	86246138	0	6	18,202,59,103,18,54,	0,48259,48550,48731,48924,49310,
LjG1.1_chr2	86196774	86246138	NOV.11588.27	0	-	86246138	86246138	0	6	18,202,59,103,18,54,	0,48259,48550,48731,48924,49310,
LjG1.1_chr2	85708659	85960678	NOV.11588.3	0	-	85960678	85960678	0	2	35,659,	0,251360,
LjG1.1_chr2	85708659	85960678	NOV.11588.3	0	-	85960678	85960678	0	2	35,659,	0,251360,
LjG1.1_chr2	85708659	85960678	NOV.11588.3	0	-	85960678	85960678	0	2	35,659,	0,251360,
LjG1.1_chr2	85708659	85960678	NOV.11588.3	0	-	85960678	85960678	0	2	35,659,	0,251360,
LjG1.1_chr2	85708659	85960678	NOV.11588.3	0	-	85960678	85960678	0	2	35,659,	0,251360,
LjG1.1_chr2	85708659	85960678	NOV.11588.3	0	-	85960678	85960678	0	2	35,659,	0,251360,
LjG1.1_chr2	85708659	85960678	NOV.11588.3	0	-	85960678	85960678	0	2	35,659,	0,251360,
LjG1.1_chr2	85708659	85960678	NOV.11588.3	0	-	85960678	85960678	0	2	35,659,	0,251360,
LjG1.1_chr2	85708659	85960678	NOV.11588.3	0	-	85960678	85960678	0	2	35,659,	0,251360,
LjG1.1_chr2	85708659	85960678	NOV.11588.3	0	-	85960678	85960678	0	2	35,659,	0,251360,
LjG1.1_chr2	85708659	85960678	NOV.11588.3	0	-	85960678	85960678	0	2	35,659,	0,251360,
LjG1.1_chr2	86196774	86225242	NOV.11588.32	0	-	86225242	86225242	0	4	18,45,51,124,	0,27427,28180,28344,
LjG1.1_chr2	86196774	86225242	NOV.11588.32	0	-	86225242	86225242	0	4	18,45,51,124,	0,27427,28180,28344,
LjG1.1_chr2	85708661	85960693	NOV.11588.4	0	-	85960693	85960693	0	2	34,675,	0,251357,
LjG1.1_chr2	85708661	85960693	NOV.11588.4	0	-	85960693	85960693	0	2	34,675,	0,251357,
LjG1.1_chr2	85708661	85960693	NOV.11588.4	0	-	85960693	85960693	0	2	34,675,	0,251357,
LjG1.1_chr2	85708661	85960693	NOV.11588.4	0	-	85960693	85960693	0	2	34,675,	0,251357,
LjG1.1_chr2	85708661	85960693	NOV.11588.4	0	-	85960693	85960693	0	2	34,675,	0,251357,
LjG1.1_chr2	85708661	85960693	NOV.11588.4	0	-	85960693	85960693	0	2	34,675,	0,251357,
LjG1.1_chr2	85708661	85960693	NOV.11588.4	0	-	85960693	85960693	0	2	34,675,	0,251357,
LjG1.1_chr2	85708661	85960693	NOV.11588.4	0	-	85960693	85960693	0	2	34,675,	0,251357,
LjG1.1_chr2	85708661	85960693	NOV.11588.4	0	-	85960693	85960693	0	2	34,675,	0,251357,
LjG1.1_chr2	85708661	85960693	NOV.11588.4	0	-	85960693	85960693	0	2	34,675,	0,251357,
LjG1.1_chr2	85708661	85960693	NOV.11588.4	0	-	85960693	85960693	0	2	34,675,	0,251357,
LjG1.1_chr2	85708661	85960693	NOV.11588.4	0	-	85960693	85960693	0	2	34,675,	0,251357,
LjG1.1_chr2	85708666	85960459	NOV.11588.7	0	-	85960459	85960459	0	2	29,458,	0,251335,
LjG1.1_chr2	85708666	85960459	NOV.11588.7	0	-	85960459	85960459	0	2	29,458,	0,251335,
LjG1.1_chr2	85708666	85960459	NOV.11588.7	0	-	85960459	85960459	0	2	29,458,	0,251335,
LjG1.1_chr2	85708666	85960459	NOV.11588.7	0	-	85960459	85960459	0	2	29,458,	0,251335,
LjG1.1_chr2	85708666	85960459	NOV.11588.7	0	-	85960459	85960459	0	2	29,458,	0,251335,
LjG1.1_chr2	85708666	85960459	NOV.11588.7	0	-	85960459	85960459	0	2	29,458,	0,251335,
LjG1.1_chr2	85708666	85960459	NOV.11588.7	0	-	85960459	85960459	0	2	29,458,	0,251335,
LjG1.1_chr2	85708666	85960459	NOV.11588.7	0	-	85960459	85960459	0	2	29,458,	0,251335,
LjG1.1_chr2	85708666	85960459	NOV.11588.7	0	-	85960459	85960459	0	2	29,458,	0,251335,
LjG1.1_chr2	85708669	85960697	NOV.11588.9	0	-	85960697	85960697	0	2	25,702,	0,251326,
LjG1.1_chr2	85708669	85960697	NOV.11588.9	0	-	85960697	85960697	0	2	25,702,	0,251326,
LjG1.1_chr2	85708669	85960697	NOV.11588.9	0	-	85960697	85960697	0	2	25,702,	0,251326,
LjG1.1_chr2	85708669	85960697	NOV.11588.9	0	-	85960697	85960697	0	2	25,702,	0,251326,
LjG1.1_chr2	85708669	85960697	NOV.11588.9	0	-	85960697	85960697	0	2	25,702,	0,251326,
LjG1.1_chr2	85708669	85960697	NOV.11588.9	0	-	85960697	85960697	0	2	25,702,	0,251326,
LjG1.1_chr2	85708669	85960697	NOV.11588.9	0	-	85960697	85960697	0	2	25,702,	0,251326,
LjG1.1_chr2	85708669	85960697	NOV.11588.9	0	-	85960697	85960697	0	2	25,702,	0,251326,
LjG1.1_chr2	85708669	85960697	NOV.11588.9	0	-	85960697	85960697	0	2	25,702,	0,251326,
LjG1.1_chr2	85708669	85960697	NOV.11588.9	0	-	85960697	85960697	0	2	25,702,	0,251326,
LjG1.1_chr2	85708669	85960697	NOV.11588.9	0	-	85960697	85960697	0	2	25,702,	0,251326,
LjG1.1_chr2	85733681	85733988	NOV.11597.1	0	+	85733988	85733988	0	1	307,	0,
LjG1.1_chr1	15184865	15190473	NOV.1161.1	0	+	15190473	15190473	0	11	61,47,58,73,74,51,78,61,91,92,27,	0,145,325,489,4298,4476,4613,4775,5195,5394,5581,
LjG1.1_chr2	85915344	86009508	NOV.11617.1	0	+	86009508	86009508	0	2	527,11,	0,94153,
LjG1.1_chr2	85915344	86009508	NOV.11617.1	0	+	86009508	86009508	0	2	527,11,	0,94153,
LjG1.1_chr2	85915344	86009508	NOV.11617.1	0	+	86009508	86009508	0	2	527,11,	0,94153,
LjG1.1_chr2	85915344	86009508	NOV.11617.1	0	+	86009508	86009508	0	2	527,11,	0,94153,
LjG1.1_chr2	85915344	86009508	NOV.11617.1	0	+	86009508	86009508	0	2	527,11,	0,94153,
LjG1.1_chr2	85915344	86009508	NOV.11617.1	0	+	86009508	86009508	0	2	527,11,	0,94153,
LjG1.1_chr2	85915344	86009508	NOV.11617.1	0	+	86009508	86009508	0	2	527,11,	0,94153,
LjG1.1_chr2	86243092	86243908	NOV.11650.1	0	+	86243908	86243908	0	1	816,	0,
LjG1.1_chr2	86243130	86243878	NOV.11650.2	0	+	86243878	86243878	0	2	50,661,	0,87,
LjG1.1_chr2	86264924	86265251	NOV.11653.1	0	-	86265251	86265251	0	1	327,	0,
LjG1.1_chr2	86342042	86342454	NOV.11662.1	0	-	86342454	86342454	0	1	412,	0,
LjG1.1_chr2	86354713	86354942	NOV.11664.1	0	-	86354942	86354942	0	1	229,	0,
LjG1.1_chr2	86746260	86828338	NOV.11666.13	0	+	86828338	86828338	0	3	305,216,13,	0,8751,82065,
LjG1.1_chr2	86746260	86828338	NOV.11666.13	0	+	86828338	86828338	0	3	305,216,13,	0,8751,82065,
LjG1.1_chr2	86746260	86828338	NOV.11666.13	0	+	86828338	86828338	0	3	305,216,13,	0,8751,82065,
LjG1.1_chr2	86746260	86828338	NOV.11666.13	0	+	86828338	86828338	0	3	305,216,13,	0,8751,82065,
LjG1.1_chr2	86746260	86828338	NOV.11666.13	0	+	86828338	86828338	0	3	305,216,13,	0,8751,82065,
LjG1.1_chr2	86746260	86828338	NOV.11666.13	0	+	86828338	86828338	0	3	305,216,13,	0,8751,82065,
LjG1.1_chr2	86746260	86828338	NOV.11666.13	0	+	86828338	86828338	0	3	305,216,13,	0,8751,82065,
LjG1.1_chr2	86746260	86828338	NOV.11666.13	0	+	86828338	86828338	0	3	305,216,13,	0,8751,82065,
LjG1.1_chr2	86746260	86828338	NOV.11666.13	0	+	86828338	86828338	0	3	305,216,13,	0,8751,82065,
LjG1.1_chr2	86746260	86828338	NOV.11666.13	0	+	86828338	86828338	0	3	305,216,13,	0,8751,82065,
LjG1.1_chr2	86746260	86828338	NOV.11666.13	0	+	86828338	86828338	0	3	305,216,13,	0,8751,82065,
LjG1.1_chr2	86746260	86828338	NOV.11666.13	0	+	86828338	86828338	0	3	305,216,13,	0,8751,82065,
LjG1.1_chr2	86746260	86828338	NOV.11666.13	0	+	86828338	86828338	0	3	305,216,13,	0,8751,82065,
LjG1.1_chr2	86746260	86828338	NOV.11666.13	0	+	86828338	86828338	0	3	305,216,13,	0,8751,82065,
LjG1.1_chr2	86746260	86828338	NOV.11666.13	0	+	86828338	86828338	0	3	305,216,13,	0,8751,82065,
LjG1.1_chr2	86746260	86828338	NOV.11666.13	0	+	86828338	86828338	0	3	305,216,13,	0,8751,82065,
LjG1.1_chr2	86746260	86828338	NOV.11666.13	0	+	86828338	86828338	0	3	305,216,13,	0,8751,82065,
LjG1.1_chr2	86746260	86755429	NOV.11666.14	0	+	86755429	86755429	0	2	117,368,	0,8801,
LjG1.1_chr2	86746260	86755429	NOV.11666.14	0	+	86755429	86755429	0	2	117,368,	0,8801,
LjG1.1_chr2	86746260	86755429	NOV.11666.14	0	+	86755429	86755429	0	2	117,368,	0,8801,
LjG1.1_chr2	86746260	86747062	NOV.11666.15	0	+	86747062	86747062	0	3	203,52,367,	0,312,435,
LjG1.1_chr2	86746348	86755396	NOV.11666.16	0	+	86755396	86755396	0	2	231,355,	0,8693,
LjG1.1_chr2	86746348	86755396	NOV.11666.16	0	+	86755396	86755396	0	2	231,355,	0,8693,
LjG1.1_chr2	86746348	86746950	NOV.11666.18	0	+	86746950	86746950	0	2	121,239,	0,363,
LjG1.1_chr2	86754625	86755396	NOV.11666.21	0	+	86755396	86755396	0	2	127,549,	0,222,
LjG1.1_chr2	86754625	86755396	NOV.11666.22	0	+	86755396	86755396	0	2	105,399,	0,372,
LjG1.1_chr2	86754626	86755426	NOV.11666.25	0	+	86755426	86755426	0	2	127,571,	0,229,
LjG1.1_chr2	86746250	86795450	NOV.11666.5	0	+	86795450	86795450	0	3	131,379,18,	0,8788,49182,
LjG1.1_chr2	86746250	86795450	NOV.11666.5	0	+	86795450	86795450	0	3	131,379,18,	0,8788,49182,
LjG1.1_chr2	86746250	86795450	NOV.11666.5	0	+	86795450	86795450	0	3	131,379,18,	0,8788,49182,
LjG1.1_chr2	86746250	86795450	NOV.11666.5	0	+	86795450	86795450	0	3	131,379,18,	0,8788,49182,
LjG1.1_chr2	86746250	86795450	NOV.11666.5	0	+	86795450	86795450	0	3	131,379,18,	0,8788,49182,
LjG1.1_chr2	86746250	86795450	NOV.11666.5	0	+	86795450	86795450	0	3	131,379,18,	0,8788,49182,
LjG1.1_chr2	86746250	86795450	NOV.11666.5	0	+	86795450	86795450	0	3	131,379,18,	0,8788,49182,
LjG1.1_chr2	86746250	86795450	NOV.11666.5	0	+	86795450	86795450	0	3	131,379,18,	0,8788,49182,
LjG1.1_chr2	86746250	86795450	NOV.11666.5	0	+	86795450	86795450	0	3	131,379,18,	0,8788,49182,
LjG1.1_chr2	86746250	86795450	NOV.11666.5	0	+	86795450	86795450	0	3	131,379,18,	0,8788,49182,
LjG1.1_chr2	86746257	86828338	NOV.11666.6	0	+	86828338	86828338	0	3	216,92,13,	0,8878,82068,
LjG1.1_chr2	86746257	86828338	NOV.11666.6	0	+	86828338	86828338	0	3	216,92,13,	0,8878,82068,
LjG1.1_chr2	86746257	86828338	NOV.11666.6	0	+	86828338	86828338	0	3	216,92,13,	0,8878,82068,
LjG1.1_chr2	86746257	86828338	NOV.11666.6	0	+	86828338	86828338	0	3	216,92,13,	0,8878,82068,
LjG1.1_chr2	86746257	86828338	NOV.11666.6	0	+	86828338	86828338	0	3	216,92,13,	0,8878,82068,
LjG1.1_chr2	86746257	86828338	NOV.11666.6	0	+	86828338	86828338	0	3	216,92,13,	0,8878,82068,
LjG1.1_chr2	86746257	86828338	NOV.11666.6	0	+	86828338	86828338	0	3	216,92,13,	0,8878,82068,
LjG1.1_chr2	86746257	86828338	NOV.11666.6	0	+	86828338	86828338	0	3	216,92,13,	0,8878,82068,
LjG1.1_chr2	86746257	86828338	NOV.11666.6	0	+	86828338	86828338	0	3	216,92,13,	0,8878,82068,
LjG1.1_chr2	86746257	86828338	NOV.11666.6	0	+	86828338	86828338	0	3	216,92,13,	0,8878,82068,
LjG1.1_chr2	86406957	86407188	NOV.11672.1	0	-	86407188	86407188	0	1	231,	0,
LjG1.1_chr2	86406957	86407188	NOV.11672.1	0	-	86407188	86407188	0	1	231,	0,
LjG1.1_chr2	86637624	86737469	NOV.11696.1	0	+	86737469	86737469	0	4	208,43,226,14,	0,303,1250,99831,
LjG1.1_chr2	86637624	86737469	NOV.11696.1	0	+	86737469	86737469	0	4	208,43,226,14,	0,303,1250,99831,
LjG1.1_chr2	86637624	86737469	NOV.11696.1	0	+	86737469	86737469	0	4	208,43,226,14,	0,303,1250,99831,
LjG1.1_chr2	86637624	86737469	NOV.11696.1	0	+	86737469	86737469	0	4	208,43,226,14,	0,303,1250,99831,
LjG1.1_chr2	86637624	86737469	NOV.11696.1	0	+	86737469	86737469	0	4	208,43,226,14,	0,303,1250,99831,
LjG1.1_chr2	86839613	86839971	NOV.11722.1	0	+	86839971	86839971	0	1	358,	0,
LjG1.1_chr2	87195557	87195874	NOV.11757.1	0	+	87195874	87195874	0	1	317,	0,
LjG1.1_chr2	87196321	87196524	NOV.11758.1	0	+	87196524	87196524	0	1	203,	0,
LjG1.1_chr2	87197516	87197939	NOV.11759.1	0	+	87197939	87197939	0	1	423,	0,
LjG1.1_chr2	87246190	87246440	NOV.11765.1	0	+	87246440	87246440	0	1	250,	0,
LjG1.1_chr2	87260870	87261163	NOV.11767.1	0	+	87261163	87261163	0	1	293,	0,
LjG1.1_chr2	87522751	87585611	NOV.11795.6	0	-	87585611	87585611	0	2	12,301,	0,62559,
LjG1.1_chr2	87522751	87585611	NOV.11795.6	0	-	87585611	87585611	0	2	12,301,	0,62559,
LjG1.1_chr2	87522751	87585611	NOV.11795.6	0	-	87585611	87585611	0	2	12,301,	0,62559,
LjG1.1_chr2	87522751	87585611	NOV.11795.6	0	-	87585611	87585611	0	2	12,301,	0,62559,
LjG1.1_chr2	87522751	87585611	NOV.11795.6	0	-	87585611	87585611	0	2	12,301,	0,62559,
LjG1.1_chr2	87522751	87585611	NOV.11795.6	0	-	87585611	87585611	0	2	12,301,	0,62559,
LjG1.1_chr2	87522751	87585611	NOV.11795.6	0	-	87585611	87585611	0	2	12,301,	0,62559,
LjG1.1_chr2	87584006	87584431	NOV.11809.1	0	+	87584431	87584431	0	1	425,	0,
LjG1.1_chr2	87757284	87757657	NOV.11828.1	0	+	87757657	87757657	0	1	373,	0,
LjG1.1_chr2	87932565	88022144	NOV.11843.20	0	+	88022144	88022144	0	3	83,538,19,	0,193,89560,
LjG1.1_chr2	87932565	88022144	NOV.11843.20	0	+	88022144	88022144	0	3	83,538,19,	0,193,89560,
LjG1.1_chr2	87932565	88022144	NOV.11843.20	0	+	88022144	88022144	0	3	83,538,19,	0,193,89560,
LjG1.1_chr2	87932565	88022144	NOV.11843.20	0	+	88022144	88022144	0	3	83,538,19,	0,193,89560,
LjG1.1_chr2	87932565	88022144	NOV.11843.20	0	+	88022144	88022144	0	3	83,538,19,	0,193,89560,
LjG1.1_chr2	87932565	88022144	NOV.11843.20	0	+	88022144	88022144	0	3	83,538,19,	0,193,89560,
LjG1.1_chr2	87932565	88022144	NOV.11843.20	0	+	88022144	88022144	0	3	83,538,19,	0,193,89560,
LjG1.1_chr2	87932565	88022144	NOV.11843.20	0	+	88022144	88022144	0	3	83,538,19,	0,193,89560,
LjG1.1_chr2	87932565	88022144	NOV.11843.20	0	+	88022144	88022144	0	3	83,538,19,	0,193,89560,
LjG1.1_chr2	87932565	88022144	NOV.11843.20	0	+	88022144	88022144	0	3	83,538,19,	0,193,89560,
LjG1.1_chr2	87932565	88022144	NOV.11843.20	0	+	88022144	88022144	0	3	83,538,19,	0,193,89560,
LjG1.1_chr2	87932565	88022144	NOV.11843.20	0	+	88022144	88022144	0	3	83,538,19,	0,193,89560,
LjG1.1_chr2	87932565	88022144	NOV.11843.20	0	+	88022144	88022144	0	3	83,538,19,	0,193,89560,
LjG1.1_chr2	87932757	88022144	NOV.11843.22	0	+	88022144	88022144	0	2	540,19,	0,89368,
LjG1.1_chr2	87932757	88022144	NOV.11843.22	0	+	88022144	88022144	0	2	540,19,	0,89368,
LjG1.1_chr2	87932757	88022144	NOV.11843.22	0	+	88022144	88022144	0	2	540,19,	0,89368,
LjG1.1_chr2	87932757	88022144	NOV.11843.22	0	+	88022144	88022144	0	2	540,19,	0,89368,
LjG1.1_chr2	87932757	88022144	NOV.11843.22	0	+	88022144	88022144	0	2	540,19,	0,89368,
LjG1.1_chr2	87932757	88022144	NOV.11843.22	0	+	88022144	88022144	0	2	540,19,	0,89368,
LjG1.1_chr2	87932757	88022144	NOV.11843.22	0	+	88022144	88022144	0	2	540,19,	0,89368,
LjG1.1_chr2	87932757	88022144	NOV.11843.22	0	+	88022144	88022144	0	2	540,19,	0,89368,
LjG1.1_chr2	87932757	88022144	NOV.11843.22	0	+	88022144	88022144	0	2	540,19,	0,89368,
LjG1.1_chr2	87932757	88022144	NOV.11843.22	0	+	88022144	88022144	0	2	540,19,	0,89368,
LjG1.1_chr2	87932757	88022144	NOV.11843.22	0	+	88022144	88022144	0	2	540,19,	0,89368,
LjG1.1_chr2	87932757	88022144	NOV.11843.22	0	+	88022144	88022144	0	2	540,19,	0,89368,
LjG1.1_chr2	87932757	88022144	NOV.11843.22	0	+	88022144	88022144	0	2	540,19,	0,89368,
LjG1.1_chr2	88219861	88318187	NOV.11875.4	0	+	88318187	88318187	0	3	14,503,17,	0,1377,98309,
LjG1.1_chr2	88219861	88318187	NOV.11875.4	0	+	88318187	88318187	0	3	14,503,17,	0,1377,98309,
LjG1.1_chr2	88219861	88318187	NOV.11875.4	0	+	88318187	88318187	0	3	14,503,17,	0,1377,98309,
LjG1.1_chr2	88219861	88318187	NOV.11875.4	0	+	88318187	88318187	0	3	14,503,17,	0,1377,98309,
LjG1.1_chr2	88219861	88318187	NOV.11875.4	0	+	88318187	88318187	0	3	14,503,17,	0,1377,98309,
LjG1.1_chr2	88219861	88318187	NOV.11875.4	0	+	88318187	88318187	0	3	14,503,17,	0,1377,98309,
LjG1.1_chr2	88219861	88318187	NOV.11875.4	0	+	88318187	88318187	0	3	14,503,17,	0,1377,98309,
LjG1.1_chr2	88376310	88376541	NOV.11892.1	0	+	88376541	88376541	0	1	231,	0,
LjG1.1_chr2	88416187	88418080	NOV.11897.1	0	+	88418080	88418080	0	1	1893,	0,
LjG1.1_chr2	88533445	88750980	NOV.11911.1	0	+	88750980	88750980	0	3	411,184,24,	0,1000,217511,
LjG1.1_chr2	88533445	88750980	NOV.11911.1	0	+	88750980	88750980	0	3	411,184,24,	0,1000,217511,
LjG1.1_chr2	88533445	88750980	NOV.11911.1	0	+	88750980	88750980	0	3	411,184,24,	0,1000,217511,
LjG1.1_chr2	88533445	88750980	NOV.11911.1	0	+	88750980	88750980	0	3	411,184,24,	0,1000,217511,
LjG1.1_chr2	88533445	88750980	NOV.11911.1	0	+	88750980	88750980	0	3	411,184,24,	0,1000,217511,
LjG1.1_chr2	88533445	88750980	NOV.11911.1	0	+	88750980	88750980	0	3	411,184,24,	0,1000,217511,
LjG1.1_chr2	88533445	88750980	NOV.11911.1	0	+	88750980	88750980	0	3	411,184,24,	0,1000,217511,
LjG1.1_chr2	88533445	88750980	NOV.11911.1	0	+	88750980	88750980	0	3	411,184,24,	0,1000,217511,
LjG1.1_chr2	88533445	88750980	NOV.11911.1	0	+	88750980	88750980	0	3	411,184,24,	0,1000,217511,
LjG1.1_chr2	88533445	88750980	NOV.11911.1	0	+	88750980	88750980	0	3	411,184,24,	0,1000,217511,
LjG1.1_chr2	88533445	88750980	NOV.11911.1	0	+	88750980	88750980	0	3	411,184,24,	0,1000,217511,
LjG1.1_chr2	88533445	88750980	NOV.11911.1	0	+	88750980	88750980	0	3	411,184,24,	0,1000,217511,
LjG1.1_chr2	88533445	88750979	NOV.11911.2	0	+	88750979	88750979	0	3	411,225,20,	0,963,217514,
LjG1.1_chr2	88533445	88750979	NOV.11911.2	0	+	88750979	88750979	0	3	411,225,20,	0,963,217514,
LjG1.1_chr2	88533445	88750979	NOV.11911.2	0	+	88750979	88750979	0	3	411,225,20,	0,963,217514,
LjG1.1_chr2	88533445	88750979	NOV.11911.2	0	+	88750979	88750979	0	3	411,225,20,	0,963,217514,
LjG1.1_chr2	88533445	88750979	NOV.11911.2	0	+	88750979	88750979	0	3	411,225,20,	0,963,217514,
LjG1.1_chr2	88533445	88750979	NOV.11911.2	0	+	88750979	88750979	0	3	411,225,20,	0,963,217514,
LjG1.1_chr2	88533445	88750979	NOV.11911.2	0	+	88750979	88750979	0	3	411,225,20,	0,963,217514,
LjG1.1_chr2	88533445	88750979	NOV.11911.2	0	+	88750979	88750979	0	3	411,225,20,	0,963,217514,
LjG1.1_chr2	88533445	88750979	NOV.11911.2	0	+	88750979	88750979	0	3	411,225,20,	0,963,217514,
LjG1.1_chr2	88533445	88750979	NOV.11911.2	0	+	88750979	88750979	0	3	411,225,20,	0,963,217514,
LjG1.1_chr2	88576086	88647787	NOV.11918.1	0	-	88647787	88647787	0	4	17,1245,47,152,	0,70084,71413,71549,
LjG1.1_chr2	88576086	88647787	NOV.11918.1	0	-	88647787	88647787	0	4	17,1245,47,152,	0,70084,71413,71549,
LjG1.1_chr2	88758135	88758723	NOV.11937.1	0	+	88758723	88758723	0	1	588,	0,
LjG1.1_chr1	15866327	15866624	NOV.1195.1	0	-	15866624	15866624	0	1	297,	0,
LjG1.1_chr1	15866327	15866624	NOV.1195.1	0	-	15866624	15866624	0	1	297,	0,
LjG1.1_chr2	89092269	89149039	NOV.11960.1	0	-	89149039	89149039	0	3	2747,708,124,	0,6929,56646,
LjG1.1_chr2	89092269	89149039	NOV.11960.1	0	-	89149039	89149039	0	3	2747,708,124,	0,6929,56646,
LjG1.1_chr2	89190945	89262085	NOV.11968.3	0	+	89262085	89262085	0	3	165,617,20,	0,318,71120,
LjG1.1_chr2	89190945	89262085	NOV.11968.3	0	+	89262085	89262085	0	3	165,617,20,	0,318,71120,
LjG1.1_chr2	89190945	89262085	NOV.11968.3	0	+	89262085	89262085	0	3	165,617,20,	0,318,71120,
LjG1.1_chr2	89190945	89262085	NOV.11968.3	0	+	89262085	89262085	0	3	165,617,20,	0,318,71120,
LjG1.1_chr2	89190945	89262085	NOV.11968.3	0	+	89262085	89262085	0	3	165,617,20,	0,318,71120,
LjG1.1_chr2	89240148	89286912	NOV.11973.1	0	+	89286912	89286912	0	3	16,499,14,	0,781,46750,
LjG1.1_chr2	89240148	89286912	NOV.11973.1	0	+	89286912	89286912	0	3	16,499,14,	0,781,46750,
LjG1.1_chr2	89240148	89286912	NOV.11973.1	0	+	89286912	89286912	0	3	16,499,14,	0,781,46750,
LjG1.1_chr2	89240148	89286912	NOV.11973.1	0	+	89286912	89286912	0	3	16,499,14,	0,781,46750,
LjG1.1_chr2	89240148	89286912	NOV.11973.1	0	+	89286912	89286912	0	3	16,499,14,	0,781,46750,
LjG1.1_chr2	89240148	89286912	NOV.11973.1	0	+	89286912	89286912	0	3	16,499,14,	0,781,46750,
LjG1.1_chr2	89240148	89286912	NOV.11973.1	0	+	89286912	89286912	0	3	16,499,14,	0,781,46750,
LjG1.1_chr2	89240148	89286912	NOV.11973.1	0	+	89286912	89286912	0	3	16,499,14,	0,781,46750,
LjG1.1_chr2	89323265	89827981	NOV.11983.1	0	-	89827981	89827981	0	3	36,588,525,	0,502893,504191,
LjG1.1_chr2	89323265	89827981	NOV.11983.1	0	-	89827981	89827981	0	3	36,588,525,	0,502893,504191,
LjG1.1_chr2	89323265	89827981	NOV.11983.1	0	-	89827981	89827981	0	3	36,588,525,	0,502893,504191,
LjG1.1_chr2	89323265	89827981	NOV.11983.1	0	-	89827981	89827981	0	3	36,588,525,	0,502893,504191,
LjG1.1_chr2	89323265	89827981	NOV.11983.1	0	-	89827981	89827981	0	3	36,588,525,	0,502893,504191,
LjG1.1_chr2	89323265	89827981	NOV.11983.1	0	-	89827981	89827981	0	3	36,588,525,	0,502893,504191,
LjG1.1_chr2	89323265	89827981	NOV.11983.1	0	-	89827981	89827981	0	3	36,588,525,	0,502893,504191,
LjG1.1_chr2	89323265	89827981	NOV.11983.1	0	-	89827981	89827981	0	3	36,588,525,	0,502893,504191,
LjG1.1_chr2	89323265	89827981	NOV.11983.1	0	-	89827981	89827981	0	3	36,588,525,	0,502893,504191,
LjG1.1_chr2	89323265	89827981	NOV.11983.1	0	-	89827981	89827981	0	3	36,588,525,	0,502893,504191,
LjG1.1_chr2	89323265	89827981	NOV.11983.1	0	-	89827981	89827981	0	3	36,588,525,	0,502893,504191,
LjG1.1_chr2	89323265	89827981	NOV.11983.1	0	-	89827981	89827981	0	3	36,588,525,	0,502893,504191,
LjG1.1_chr2	89323265	89827981	NOV.11983.1	0	-	89827981	89827981	0	3	36,588,525,	0,502893,504191,
LjG1.1_chr2	89323265	89827981	NOV.11983.1	0	-	89827981	89827981	0	3	36,588,525,	0,502893,504191,
LjG1.1_chr2	89323265	89827981	NOV.11983.1	0	-	89827981	89827981	0	3	36,588,525,	0,502893,504191,
LjG1.1_chr2	89323265	89827981	NOV.11983.1	0	-	89827981	89827981	0	3	36,588,525,	0,502893,504191,
LjG1.1_chr2	89323265	89827981	NOV.11983.1	0	-	89827981	89827981	0	3	36,588,525,	0,502893,504191,
LjG1.1_chr2	89323265	89827981	NOV.11983.1	0	-	89827981	89827981	0	3	36,588,525,	0,502893,504191,
LjG1.1_chr2	89323265	89827981	NOV.11983.1	0	-	89827981	89827981	0	3	36,588,525,	0,502893,504191,
LjG1.1_chr2	89323265	89827981	NOV.11983.1	0	-	89827981	89827981	0	3	36,588,525,	0,502893,504191,
LjG1.1_chr2	89323265	89827981	NOV.11983.1	0	-	89827981	89827981	0	3	36,588,525,	0,502893,504191,
LjG1.1_chr2	89323265	89827981	NOV.11983.1	0	-	89827981	89827981	0	3	36,588,525,	0,502893,504191,
LjG1.1_chr2	89323275	89364716	NOV.11983.4	0	-	89364716	89364716	0	3	26,541,318,	0,40515,41123,
LjG1.1_chr2	89451258	89497899	NOV.11983.9	0	-	89497899	89497899	0	3	16,401,450,	0,45523,46191,
LjG1.1_chr2	89451258	89497899	NOV.11983.9	0	-	89497899	89497899	0	3	16,401,450,	0,45523,46191,
LjG1.1_chr2	89451258	89497899	NOV.11983.9	0	-	89497899	89497899	0	3	16,401,450,	0,45523,46191,
LjG1.1_chr2	89451258	89497899	NOV.11983.9	0	-	89497899	89497899	0	3	16,401,450,	0,45523,46191,
LjG1.1_chr2	89451258	89497899	NOV.11983.9	0	-	89497899	89497899	0	3	16,401,450,	0,45523,46191,
LjG1.1_chr2	89364216	89448125	NOV.11986.1	0	+	89448125	89448125	0	2	91,385,	0,83524,
LjG1.1_chr2	89364216	89448125	NOV.11986.1	0	+	89448125	89448125	0	2	91,385,	0,83524,
LjG1.1_chr2	89364216	89448125	NOV.11986.1	0	+	89448125	89448125	0	2	91,385,	0,83524,
LjG1.1_chr2	89364216	89448125	NOV.11986.1	0	+	89448125	89448125	0	2	91,385,	0,83524,
LjG1.1_chr2	89364216	89448125	NOV.11986.1	0	+	89448125	89448125	0	2	91,385,	0,83524,
LjG1.1_chr2	89364216	89448125	NOV.11986.1	0	+	89448125	89448125	0	2	91,385,	0,83524,
LjG1.1_chr2	89364216	89448125	NOV.11986.1	0	+	89448125	89448125	0	2	91,385,	0,83524,
LjG1.1_chr2	89464496	89465050	NOV.12000.1	0	-	89465050	89465050	0	1	554,	0,
LjG1.1_chr2	89481333	89481709	NOV.12004.1	0	+	89481709	89481709	0	1	376,	0,
LjG1.1_chr2	89569864	89570499	NOV.12015.1	0	-	89570499	89570499	0	1	635,	0,
LjG1.1_chr2	89609556	89696684	NOV.12021.2	0	+	89696684	89696684	0	4	602,163,648,14,	0,990,1391,87114,
LjG1.1_chr2	89609556	89696684	NOV.12021.2	0	+	89696684	89696684	0	4	602,163,648,14,	0,990,1391,87114,
LjG1.1_chr2	89609556	89696684	NOV.12021.2	0	+	89696684	89696684	0	4	602,163,648,14,	0,990,1391,87114,
LjG1.1_chr2	89810775	89811001	NOV.12037.1	0	+	89811001	89811001	0	1	226,	0,
LjG1.1_chr2	90021976	90022583	NOV.12061.1	0	+	90022583	90022583	0	1	607,	0,
LjG1.1_chr2	90064260	90064465	NOV.12068.1	0	+	90064465	90064465	0	1	205,	0,
LjG1.1_chr2	90630098	90796278	NOV.12093.23	0	+	90796278	90796278	0	5	35,87,209,605,50,	0,135,308,625,166130,
LjG1.1_chr2	90630098	90796278	NOV.12093.23	0	+	90796278	90796278	0	5	35,87,209,605,50,	0,135,308,625,166130,
LjG1.1_chr2	90630098	90796278	NOV.12093.23	0	+	90796278	90796278	0	5	35,87,209,605,50,	0,135,308,625,166130,
LjG1.1_chr2	90630098	90796278	NOV.12093.23	0	+	90796278	90796278	0	5	35,87,209,605,50,	0,135,308,625,166130,
LjG1.1_chr2	90630098	90796278	NOV.12093.23	0	+	90796278	90796278	0	5	35,87,209,605,50,	0,135,308,625,166130,
LjG1.1_chr2	90630098	90796278	NOV.12093.23	0	+	90796278	90796278	0	5	35,87,209,605,50,	0,135,308,625,166130,
LjG1.1_chr2	90630098	90796278	NOV.12093.23	0	+	90796278	90796278	0	5	35,87,209,605,50,	0,135,308,625,166130,
LjG1.1_chr2	90630098	90796278	NOV.12093.23	0	+	90796278	90796278	0	5	35,87,209,605,50,	0,135,308,625,166130,
LjG1.1_chr2	90630098	90796278	NOV.12093.23	0	+	90796278	90796278	0	5	35,87,209,605,50,	0,135,308,625,166130,
LjG1.1_chr2	90630098	90796278	NOV.12093.23	0	+	90796278	90796278	0	5	35,87,209,605,50,	0,135,308,625,166130,
LjG1.1_chr2	90630098	90796278	NOV.12093.23	0	+	90796278	90796278	0	5	35,87,209,605,50,	0,135,308,625,166130,
LjG1.1_chr2	90743137	90777198	NOV.12093.42	0	+	90777198	90777198	0	4	32,415,435,16,	0,606,2980,34045,
LjG1.1_chr2	90743807	90796276	NOV.12093.43	0	+	90796276	90796276	0	3	351,445,48,	0,2310,52421,
LjG1.1_chr2	90743817	90796271	NOV.12093.44	0	+	90796271	90796271	0	3	341,422,32,	0,2300,52422,
LjG1.1_chr2	90743818	90796268	NOV.12093.45	0	+	90796268	90796268	0	3	340,416,42,	0,2299,52408,
LjG1.1_chr1	16189269	16190055	NOV.1211.1	0	-	16190055	16190055	0	1	786,	0,
LjG1.1_chr1	16189269	16190055	NOV.1211.1	0	-	16190055	16190055	0	1	786,	0,
LjG1.1_chr2	90497396	90498808	NOV.12119.1	0	+	90498808	90498808	0	2	401,447,	0,965,
LjG1.1_chr2	90745759	90746324	NOV.12140.1	0	-	90746324	90746324	0	1	565,	0,
LjG1.1_chr2	90847950	90849143	NOV.12152.1	0	-	90849143	90849143	0	2	848,238,	0,955,
LjG1.1_chr2	91115513	91116201	NOV.12176.1	0	+	91116201	91116201	0	1	688,	0,
LjG1.1_chr2	91115513	91116201	NOV.12176.1	0	+	91116201	91116201	0	1	688,	0,
LjG1.1_chr1	16244087	16244785	NOV.1218.1	0	-	16244785	16244785	0	1	698,	0,
LjG1.1_chr2	91251321	91318402	NOV.12186.12	0	+	91318402	91318402	0	3	708,282,15,	0,1453,67066,
LjG1.1_chr2	91251321	91318402	NOV.12186.12	0	+	91318402	91318402	0	3	708,282,15,	0,1453,67066,
LjG1.1_chr2	91251321	91318402	NOV.12186.12	0	+	91318402	91318402	0	3	708,282,15,	0,1453,67066,
LjG1.1_chr2	91251321	91318402	NOV.12186.12	0	+	91318402	91318402	0	3	708,282,15,	0,1453,67066,
LjG1.1_chr2	91379819	91380466	NOV.12201.1	0	+	91380466	91380466	0	1	647,	0,
LjG1.1_chr2	91379819	91380466	NOV.12201.1	0	+	91380466	91380466	0	1	647,	0,
LjG1.1_chr2	91379819	91380466	NOV.12201.1	0	+	91380466	91380466	0	1	647,	0,
LjG1.1_chr2	91379819	91380466	NOV.12201.1	0	+	91380466	91380466	0	1	647,	0,
LjG1.1_chr2	91467210	91554270	NOV.12210.3	0	+	91554270	91554270	0	3	167,139,16,	0,253,87044,
LjG1.1_chr2	91467210	91554270	NOV.12210.3	0	+	91554270	91554270	0	3	167,139,16,	0,253,87044,
LjG1.1_chr2	91467210	91554270	NOV.12210.3	0	+	91554270	91554270	0	3	167,139,16,	0,253,87044,
LjG1.1_chr2	91467210	91554270	NOV.12210.3	0	+	91554270	91554270	0	3	167,139,16,	0,253,87044,
LjG1.1_chr2	91720479	91782946	NOV.12229.4	0	-	91782946	91782946	0	4	21,310,156,189,	0,61579,62005,62278,
LjG1.1_chr2	91720479	91782946	NOV.12229.4	0	-	91782946	91782946	0	4	21,310,156,189,	0,61579,62005,62278,
LjG1.1_chr2	91720479	91782946	NOV.12229.4	0	-	91782946	91782946	0	4	21,310,156,189,	0,61579,62005,62278,
LjG1.1_chr2	91720479	91783700	NOV.12229.5	0	-	91783700	91783700	0	5	20,309,156,187,94,	0,61580,62005,62278,63127,
LjG1.1_chr2	91720479	91783700	NOV.12229.5	0	-	91783700	91783700	0	5	20,309,156,187,94,	0,61580,62005,62278,63127,
LjG1.1_chr2	91720479	91783700	NOV.12229.5	0	-	91783700	91783700	0	5	20,309,156,187,94,	0,61580,62005,62278,63127,
LjG1.1_chr2	91720480	91783932	NOV.12229.6	0	-	91783932	91783932	0	5	20,647,187,92,135,	0,61513,62277,63126,63317,
LjG1.1_chr2	91720480	91783932	NOV.12229.6	0	-	91783932	91783932	0	5	20,647,187,92,135,	0,61513,62277,63126,63317,
LjG1.1_chr2	91720480	91783932	NOV.12229.6	0	-	91783932	91783932	0	5	20,647,187,92,135,	0,61513,62277,63126,63317,
LjG1.1_chr1	16341256	16341498	NOV.1223.1	0	-	16341498	16341498	0	1	242,	0,
LjG1.1_chr1	16341256	16341498	NOV.1223.1	0	-	16341498	16341498	0	1	242,	0,
LjG1.1_chr2	91825676	91826446	NOV.12242.1	0	-	91826446	91826446	0	2	435,244,	0,526,
LjG1.1_chr2	91875606	91875952	NOV.12249.1	0	-	91875952	91875952	0	1	346,	0,
LjG1.1_chr2	91898057	91977888	NOV.12251.4	0	-	91977888	91977888	0	2	495,12,	0,79819,
LjG1.1_chr2	91898057	91977888	NOV.12251.4	0	-	91977888	91977888	0	2	495,12,	0,79819,
LjG1.1_chr2	91898057	91977888	NOV.12251.4	0	-	91977888	91977888	0	2	495,12,	0,79819,
LjG1.1_chr2	91898057	91977888	NOV.12251.4	0	-	91977888	91977888	0	2	495,12,	0,79819,
LjG1.1_chr2	91898057	91977888	NOV.12251.4	0	-	91977888	91977888	0	2	495,12,	0,79819,
LjG1.1_chr2	91898057	91977888	NOV.12251.4	0	-	91977888	91977888	0	2	495,12,	0,79819,
LjG1.1_chr2	92223421	92279284	NOV.12266.14	0	+	92279284	92279284	0	2	442,36,	0,55827,
LjG1.1_chr2	92223421	92279284	NOV.12266.15	0	+	92279284	92279284	0	2	443,35,	0,55828,
LjG1.1_chr2	92235775	92279276	NOV.12266.23	0	+	92279276	92279276	0	5	153,45,78,546,27,	0,257,1854,3039,43474,
LjG1.1_chr2	92238813	92279277	NOV.12266.24	0	+	92279277	92279277	0	2	385,28,	0,40436,
LjG1.1_chr2	92238813	92279282	NOV.12266.25	0	+	92279282	92279282	0	2	418,33,	0,40436,
LjG1.1_chr2	92072825	92146148	NOV.12271.2	0	-	92146148	92146148	0	4	155,284,138,100,	0,72566,72986,73223,
LjG1.1_chr2	92072825	92146148	NOV.12271.2	0	-	92146148	92146148	0	4	155,284,138,100,	0,72566,72986,73223,
LjG1.1_chr2	92072825	92146148	NOV.12271.2	0	-	92146148	92146148	0	4	155,284,138,100,	0,72566,72986,73223,
LjG1.1_chr2	92072825	92146148	NOV.12271.2	0	-	92146148	92146148	0	4	155,284,138,100,	0,72566,72986,73223,
LjG1.1_chr2	92145320	92145950	NOV.12271.3	0	-	92145950	92145950	0	2	380,139,	0,491,
LjG1.1_chr2	92195833	92196561	NOV.12282.1	0	-	92196561	92196561	0	1	728,	0,
LjG1.1_chr2	92255948	92501991	NOV.12288.12	0	-	92501991	92501991	0	3	34,765,61,	0,245097,245982,
LjG1.1_chr2	92255948	92501991	NOV.12288.12	0	-	92501991	92501991	0	3	34,765,61,	0,245097,245982,
LjG1.1_chr2	92255948	92501991	NOV.12288.12	0	-	92501991	92501991	0	3	34,765,61,	0,245097,245982,
LjG1.1_chr2	92255948	92501991	NOV.12288.12	0	-	92501991	92501991	0	3	34,765,61,	0,245097,245982,
LjG1.1_chr2	92255948	92501991	NOV.12288.12	0	-	92501991	92501991	0	3	34,765,61,	0,245097,245982,
LjG1.1_chr2	92255948	92501991	NOV.12288.12	0	-	92501991	92501991	0	3	34,765,61,	0,245097,245982,
LjG1.1_chr2	92255948	92501991	NOV.12288.12	0	-	92501991	92501991	0	3	34,765,61,	0,245097,245982,
LjG1.1_chr2	92255948	92501991	NOV.12288.12	0	-	92501991	92501991	0	3	34,765,61,	0,245097,245982,
LjG1.1_chr2	92255948	92501991	NOV.12288.12	0	-	92501991	92501991	0	3	34,765,61,	0,245097,245982,
LjG1.1_chr2	92255948	92501991	NOV.12288.12	0	-	92501991	92501991	0	3	34,765,61,	0,245097,245982,
LjG1.1_chr2	92255948	92501991	NOV.12288.12	0	-	92501991	92501991	0	3	34,765,61,	0,245097,245982,
LjG1.1_chr2	92255948	92501991	NOV.12288.12	0	-	92501991	92501991	0	3	34,765,61,	0,245097,245982,
LjG1.1_chr2	92255948	92501991	NOV.12288.12	0	-	92501991	92501991	0	3	34,765,61,	0,245097,245982,
LjG1.1_chr2	92255948	92501991	NOV.12288.12	0	-	92501991	92501991	0	3	34,765,61,	0,245097,245982,
LjG1.1_chr2	92255948	92501991	NOV.12288.12	0	-	92501991	92501991	0	3	34,765,61,	0,245097,245982,
LjG1.1_chr2	92255952	92501980	NOV.12288.14	0	-	92501980	92501980	0	3	30,709,50,	0,245149,245978,
LjG1.1_chr2	92255952	92501980	NOV.12288.14	0	-	92501980	92501980	0	3	30,709,50,	0,245149,245978,
LjG1.1_chr2	92255952	92501980	NOV.12288.14	0	-	92501980	92501980	0	3	30,709,50,	0,245149,245978,
LjG1.1_chr2	92255952	92501980	NOV.12288.14	0	-	92501980	92501980	0	3	30,709,50,	0,245149,245978,
LjG1.1_chr2	92255952	92501980	NOV.12288.14	0	-	92501980	92501980	0	3	30,709,50,	0,245149,245978,
LjG1.1_chr2	92255952	92501980	NOV.12288.14	0	-	92501980	92501980	0	3	30,709,50,	0,245149,245978,
LjG1.1_chr2	92255952	92501980	NOV.12288.14	0	-	92501980	92501980	0	3	30,709,50,	0,245149,245978,
LjG1.1_chr2	92255952	92501980	NOV.12288.14	0	-	92501980	92501980	0	3	30,709,50,	0,245149,245978,
LjG1.1_chr2	92255952	92501980	NOV.12288.14	0	-	92501980	92501980	0	3	30,709,50,	0,245149,245978,
LjG1.1_chr2	92255952	92501980	NOV.12288.14	0	-	92501980	92501980	0	3	30,709,50,	0,245149,245978,
LjG1.1_chr2	92255952	92501980	NOV.12288.14	0	-	92501980	92501980	0	3	30,709,50,	0,245149,245978,
LjG1.1_chr2	92255952	92501980	NOV.12288.14	0	-	92501980	92501980	0	3	30,709,50,	0,245149,245978,
LjG1.1_chr2	92255952	92501980	NOV.12288.14	0	-	92501980	92501980	0	3	30,709,50,	0,245149,245978,
LjG1.1_chr2	92255952	92501980	NOV.12288.14	0	-	92501980	92501980	0	3	30,709,50,	0,245149,245978,
LjG1.1_chr2	92255952	92501980	NOV.12288.14	0	-	92501980	92501980	0	3	30,709,50,	0,245149,245978,
LjG1.1_chr2	92255952	92501980	NOV.12288.14	0	-	92501980	92501980	0	3	30,709,50,	0,245149,245978,
LjG1.1_chr2	92255954	92443060	NOV.12288.17	0	-	92443060	92443060	0	3	28,596,105,	0,186272,187001,
LjG1.1_chr2	92255954	92443060	NOV.12288.17	0	-	92443060	92443060	0	3	28,596,105,	0,186272,187001,
LjG1.1_chr2	92255954	92443060	NOV.12288.17	0	-	92443060	92443060	0	3	28,596,105,	0,186272,187001,
LjG1.1_chr2	92255954	92443060	NOV.12288.17	0	-	92443060	92443060	0	3	28,596,105,	0,186272,187001,
LjG1.1_chr2	92255954	92443060	NOV.12288.17	0	-	92443060	92443060	0	3	28,596,105,	0,186272,187001,
LjG1.1_chr2	92484530	92503017	NOV.12288.33	0	-	92503017	92503017	0	4	14,369,21,38,	0,16560,18328,18449,
LjG1.1_chr2	92255947	92501972	NOV.12288.8	0	-	92501972	92501972	0	3	35,716,42,	0,245147,245983,
LjG1.1_chr2	92255947	92501972	NOV.12288.8	0	-	92501972	92501972	0	3	35,716,42,	0,245147,245983,
LjG1.1_chr2	92255947	92501972	NOV.12288.8	0	-	92501972	92501972	0	3	35,716,42,	0,245147,245983,
LjG1.1_chr2	92255947	92501972	NOV.12288.8	0	-	92501972	92501972	0	3	35,716,42,	0,245147,245983,
LjG1.1_chr2	92255947	92501972	NOV.12288.8	0	-	92501972	92501972	0	3	35,716,42,	0,245147,245983,
LjG1.1_chr2	92255947	92501972	NOV.12288.8	0	-	92501972	92501972	0	3	35,716,42,	0,245147,245983,
LjG1.1_chr2	92255947	92501972	NOV.12288.8	0	-	92501972	92501972	0	3	35,716,42,	0,245147,245983,
LjG1.1_chr2	92255947	92501972	NOV.12288.8	0	-	92501972	92501972	0	3	35,716,42,	0,245147,245983,
LjG1.1_chr2	92255947	92501972	NOV.12288.8	0	-	92501972	92501972	0	3	35,716,42,	0,245147,245983,
LjG1.1_chr2	92255947	92501972	NOV.12288.8	0	-	92501972	92501972	0	3	35,716,42,	0,245147,245983,
LjG1.1_chr2	92255947	92501972	NOV.12288.8	0	-	92501972	92501972	0	3	35,716,42,	0,245147,245983,
LjG1.1_chr2	92255947	92501972	NOV.12288.8	0	-	92501972	92501972	0	3	35,716,42,	0,245147,245983,
LjG1.1_chr2	92255947	92501972	NOV.12288.8	0	-	92501972	92501972	0	3	35,716,42,	0,245147,245983,
LjG1.1_chr2	92255947	92501972	NOV.12288.9	0	-	92501972	92501972	0	3	33,712,42,	0,245151,245983,
LjG1.1_chr2	92255947	92501972	NOV.12288.9	0	-	92501972	92501972	0	3	33,712,42,	0,245151,245983,
LjG1.1_chr2	92255947	92501972	NOV.12288.9	0	-	92501972	92501972	0	3	33,712,42,	0,245151,245983,
LjG1.1_chr2	92255947	92501972	NOV.12288.9	0	-	92501972	92501972	0	3	33,712,42,	0,245151,245983,
LjG1.1_chr2	92255947	92501972	NOV.12288.9	0	-	92501972	92501972	0	3	33,712,42,	0,245151,245983,
LjG1.1_chr2	92255947	92501972	NOV.12288.9	0	-	92501972	92501972	0	3	33,712,42,	0,245151,245983,
LjG1.1_chr2	92255947	92501972	NOV.12288.9	0	-	92501972	92501972	0	3	33,712,42,	0,245151,245983,
LjG1.1_chr2	92255947	92501972	NOV.12288.9	0	-	92501972	92501972	0	3	33,712,42,	0,245151,245983,
LjG1.1_chr2	92255947	92501972	NOV.12288.9	0	-	92501972	92501972	0	3	33,712,42,	0,245151,245983,
LjG1.1_chr2	92255947	92501972	NOV.12288.9	0	-	92501972	92501972	0	3	33,712,42,	0,245151,245983,
LjG1.1_chr2	92255947	92501972	NOV.12288.9	0	-	92501972	92501972	0	3	33,712,42,	0,245151,245983,
LjG1.1_chr2	92255947	92501972	NOV.12288.9	0	-	92501972	92501972	0	3	33,712,42,	0,245151,245983,
LjG1.1_chr2	92255947	92501972	NOV.12288.9	0	-	92501972	92501972	0	3	33,712,42,	0,245151,245983,
LjG1.1_chr2	92255947	92501972	NOV.12288.9	0	-	92501972	92501972	0	3	33,712,42,	0,245151,245983,
LjG1.1_chr2	92319804	92320128	NOV.12294.1	0	+	92320128	92320128	0	1	324,	0,
LjG1.1_chr2	92438035	92439167	NOV.12306.2	0	+	92439167	92439167	0	2	253,648,	0,484,
LjG1.1_chr2	92512639	92514825	NOV.12318.2	0	-	92514825	92514825	0	2	452,356,	0,1830,
LjG1.1_chr2	92514490	92514712	NOV.12319.1	0	+	92514712	92514712	0	1	222,	0,
LjG1.1_chr2	92589510	92596611	NOV.12325.1	0	-	92596611	92596611	0	2	314,204,	0,6897,
LjG1.1_chr2	92717082	92736970	NOV.12343.1	0	-	92736970	92736970	0	2	10,219,	0,19669,
LjG1.1_chr2	92717082	92736970	NOV.12343.1	0	-	92736970	92736970	0	2	10,219,	0,19669,
LjG1.1_chr2	92717082	92736970	NOV.12343.1	0	-	92736970	92736970	0	2	10,219,	0,19669,
LjG1.1_chr2	92717082	92736970	NOV.12343.1	0	-	92736970	92736970	0	2	10,219,	0,19669,
LjG1.1_chr2	92735779	92817180	NOV.12343.2	0	-	92817180	92817180	0	3	439,151,148,	0,733,81253,
LjG1.1_chr2	92735779	92817180	NOV.12343.2	0	-	92817180	92817180	0	3	439,151,148,	0,733,81253,
LjG1.1_chr2	92735779	92817180	NOV.12343.2	0	-	92817180	92817180	0	3	439,151,148,	0,733,81253,
LjG1.1_chr2	92883642	92883894	NOV.12359.1	0	-	92883894	92883894	0	1	252,	0,
LjG1.1_chr2	92966871	93045865	NOV.12370.1	0	+	93045865	93045865	0	2	660,12,	0,78982,
LjG1.1_chr2	92966871	93045865	NOV.12370.1	0	+	93045865	93045865	0	2	660,12,	0,78982,
LjG1.1_chr2	92966871	93045865	NOV.12370.1	0	+	93045865	93045865	0	2	660,12,	0,78982,
LjG1.1_chr2	92966871	93045865	NOV.12370.1	0	+	93045865	93045865	0	2	660,12,	0,78982,
LjG1.1_chr2	92966871	93045865	NOV.12370.1	0	+	93045865	93045865	0	2	660,12,	0,78982,
LjG1.1_chr2	92995715	92995922	NOV.12373.1	0	-	92995922	92995922	0	1	207,	0,
LjG1.1_chr2	93008474	93008848	NOV.12376.1	0	-	93008848	93008848	0	1	374,	0,
LjG1.1_chr2	93023369	93024262	NOV.12379.3	0	+	93024262	93024262	0	2	76,714,	0,179,
LjG1.1_chr2	93125420	93126174	NOV.12396.1	0	-	93126174	93126174	0	1	754,	0,
LjG1.1_chr1	16743047	16743599	NOV.1242.1	0	-	16743599	16743599	0	1	552,	0,
LjG1.1_chr1	16774592	16894403	NOV.1243.1	0	+	16894403	16894403	0	3	293,356,25,	0,446,119786,
LjG1.1_chr1	16774592	16894403	NOV.1243.1	0	+	16894403	16894403	0	3	293,356,25,	0,446,119786,
LjG1.1_chr1	16774620	16894403	NOV.1243.2	0	+	16894403	16894403	0	3	265,339,25,	0,418,119758,
LjG1.1_chr2	93502905	93509892	NOV.12433.1	0	-	93509892	93509892	0	3	366,56,260,	0,2642,6727,
LjG1.1_chr2	93518020	93519681	NOV.12435.1	0	-	93519681	93519681	0	3	301,78,118,	0,1296,1543,
LjG1.1_chr2	93633242	93633903	NOV.12446.1	0	+	93633903	93633903	0	1	661,	0,
LjG1.1_chr2	93769561	93787354	NOV.12465.1	0	-	93787354	93787354	0	4	17,5396,154,574,	0,11389,16991,17219,
LjG1.1_chr1	16898790	16953979	NOV.1248.2	0	-	16953979	16953979	0	4	21,692,167,86,	0,50676,52459,55103,
LjG1.1_chr1	16898790	16953979	NOV.1248.2	0	-	16953979	16953979	0	4	21,692,167,86,	0,50676,52459,55103,
LjG1.1_chr1	16898790	16953979	NOV.1248.2	0	-	16953979	16953979	0	4	21,692,167,86,	0,50676,52459,55103,
LjG1.1_chr1	16898790	16950162	NOV.1248.3	0	-	16950162	16950162	0	2	21,687,	0,50685,
LjG1.1_chr1	16898790	16950162	NOV.1248.3	0	-	16950162	16950162	0	2	21,687,	0,50685,
LjG1.1_chr1	16898791	16950165	NOV.1248.5	0	-	16950165	16950165	0	2	21,701,	0,50673,
LjG1.1_chr1	16898791	16950165	NOV.1248.5	0	-	16950165	16950165	0	2	21,701,	0,50673,
LjG1.1_chr1	16898791	16950165	NOV.1248.5	0	-	16950165	16950165	0	2	21,701,	0,50673,
LjG1.1_chr1	16898792	16951371	NOV.1248.6	0	-	16951371	16951371	0	3	20,693,122,	0,50673,52457,
LjG1.1_chr1	16898792	16951371	NOV.1248.6	0	-	16951371	16951371	0	3	20,693,122,	0,50673,52457,
LjG1.1_chr1	16898792	16951371	NOV.1248.6	0	-	16951371	16951371	0	3	20,693,122,	0,50673,52457,
LjG1.1_chr1	16898793	16950153	NOV.1248.7	0	-	16950153	16950153	0	2	25,678,	0,50682,
LjG1.1_chr1	16898793	16950153	NOV.1248.7	0	-	16950153	16950153	0	2	25,678,	0,50682,
LjG1.1_chr2	94063739	94064183	NOV.12502.1	0	+	94064183	94064183	0	1	444,	0,
LjG1.1_chr2	94089893	94090317	NOV.12507.1	0	+	94090317	94090317	0	1	424,	0,
LjG1.1_chr2	94160606	94163062	NOV.12524.1	0	+	94163062	94163062	0	2	563,175,	0,2281,
LjG1.1_chr2	94246565	94538837	NOV.12536.1	0	-	94538837	94538837	0	3	20,72,387,	0,291510,291885,
LjG1.1_chr2	94246565	94538837	NOV.12536.1	0	-	94538837	94538837	0	3	20,72,387,	0,291510,291885,
LjG1.1_chr2	94246565	94538837	NOV.12536.1	0	-	94538837	94538837	0	3	20,72,387,	0,291510,291885,
LjG1.1_chr2	94246565	94538837	NOV.12536.1	0	-	94538837	94538837	0	3	20,72,387,	0,291510,291885,
LjG1.1_chr2	94246565	94538837	NOV.12536.1	0	-	94538837	94538837	0	3	20,72,387,	0,291510,291885,
LjG1.1_chr2	94246565	94538837	NOV.12536.1	0	-	94538837	94538837	0	3	20,72,387,	0,291510,291885,
LjG1.1_chr2	94246565	94538837	NOV.12536.1	0	-	94538837	94538837	0	3	20,72,387,	0,291510,291885,
LjG1.1_chr2	94246565	94538837	NOV.12536.1	0	-	94538837	94538837	0	3	20,72,387,	0,291510,291885,
LjG1.1_chr2	94246565	94538837	NOV.12536.1	0	-	94538837	94538837	0	3	20,72,387,	0,291510,291885,
LjG1.1_chr2	94246565	94538837	NOV.12536.1	0	-	94538837	94538837	0	3	20,72,387,	0,291510,291885,
LjG1.1_chr2	94246565	94538837	NOV.12536.1	0	-	94538837	94538837	0	3	20,72,387,	0,291510,291885,
LjG1.1_chr2	94246565	94538837	NOV.12536.1	0	-	94538837	94538837	0	3	20,72,387,	0,291510,291885,
LjG1.1_chr2	94246565	94538837	NOV.12536.1	0	-	94538837	94538837	0	3	20,72,387,	0,291510,291885,
LjG1.1_chr2	94246565	94538837	NOV.12536.1	0	-	94538837	94538837	0	3	20,72,387,	0,291510,291885,
LjG1.1_chr2	94246565	94538837	NOV.12536.1	0	-	94538837	94538837	0	3	20,72,387,	0,291510,291885,
LjG1.1_chr2	94246565	94538837	NOV.12536.1	0	-	94538837	94538837	0	3	20,72,387,	0,291510,291885,
LjG1.1_chr2	94246565	94538837	NOV.12536.1	0	-	94538837	94538837	0	3	20,72,387,	0,291510,291885,
LjG1.1_chr2	94246565	94538837	NOV.12536.1	0	-	94538837	94538837	0	3	20,72,387,	0,291510,291885,
LjG1.1_chr2	94246565	94538837	NOV.12536.1	0	-	94538837	94538837	0	3	20,72,387,	0,291510,291885,
LjG1.1_chr2	94246565	94538837	NOV.12536.1	0	-	94538837	94538837	0	3	20,72,387,	0,291510,291885,
LjG1.1_chr2	94246565	94538837	NOV.12536.1	0	-	94538837	94538837	0	3	20,72,387,	0,291510,291885,
LjG1.1_chr2	94246565	94538837	NOV.12536.1	0	-	94538837	94538837	0	3	20,72,387,	0,291510,291885,
LjG1.1_chr2	94246565	94538837	NOV.12536.1	0	-	94538837	94538837	0	3	20,72,387,	0,291510,291885,
LjG1.1_chr2	94246565	94538837	NOV.12536.1	0	-	94538837	94538837	0	3	20,72,387,	0,291510,291885,
LjG1.1_chr2	94246565	94538837	NOV.12536.1	0	-	94538837	94538837	0	3	20,72,387,	0,291510,291885,
LjG1.1_chr2	94382721	94382994	NOV.12554.1	0	+	94382994	94382994	0	1	273,	0,
LjG1.1_chr2	94828320	94885302	NOV.12607.4	0	+	94885302	94885302	0	4	245,112,221,22,	0,780,1045,56960,
LjG1.1_chr2	94828320	94885302	NOV.12607.4	0	+	94885302	94885302	0	4	245,112,221,22,	0,780,1045,56960,
LjG1.1_chr2	94828320	94885302	NOV.12607.4	0	+	94885302	94885302	0	4	245,112,221,22,	0,780,1045,56960,
LjG1.1_chr2	94828320	94885302	NOV.12607.4	0	+	94885302	94885302	0	4	245,112,221,22,	0,780,1045,56960,
LjG1.1_chr1	17003344	17004013	NOV.1261.1	0	+	17004013	17004013	0	1	669,	0,
LjG1.1_chr2	95218659	95219133	NOV.12638.1	0	-	95219133	95219133	0	2	352,27,	0,447,
LjG1.1_chr1	17029626	17030088	NOV.1264.1	0	-	17030088	17030088	0	2	295,76,	0,386,
LjG1.1_chr2	95234706	95234953	NOV.12642.1	0	+	95234953	95234953	0	1	247,	0,
LjG1.1_chr2	95386674	95387652	NOV.12657.1	0	-	95387652	95387652	0	3	301,100,239,	0,387,739,
LjG1.1_chr2	95469247	95469664	NOV.12669.1	0	-	95469664	95469664	0	1	417,	0,
LjG1.1_chr2	95493402	95495100	NOV.12672.1	0	-	95495100	95495100	0	2	593,88,	0,1610,
LjG1.1_chr2	95493438	95494809	NOV.12672.2	0	-	95494809	95494809	0	2	300,34,	0,1337,
LjG1.1_chr2	95493508	95495087	NOV.12672.4	0	-	95495087	95495087	0	2	448,33,	0,1546,
LjG1.1_chr3	129860	130081	NOV.12691.1	0	+	130081	130081	0	1	221,	0,
LjG1.1_chr3	130429	130709	NOV.12692.1	0	+	130709	130709	0	1	280,	0,
LjG1.1_chr3	169903	170533	NOV.12695.1	0	-	170533	170533	0	1	630,	0,
LjG1.1_chr3	169903	170533	NOV.12695.1	0	-	170533	170533	0	1	630,	0,
LjG1.1_chr3	174678	175336	NOV.12697.1	0	-	175336	175336	0	1	658,	0,
LjG1.1_chr3	174678	175336	NOV.12697.1	0	-	175336	175336	0	1	658,	0,
LjG1.1_chr3	323511	323744	NOV.12708.1	0	-	323744	323744	0	1	233,	0,
LjG1.1_chr3	328223	328535	NOV.12710.1	0	-	328535	328535	0	1	312,	0,
LjG1.1_chr3	411330	621075	NOV.12718.3	0	-	621075	621075	0	7	21,572,149,50,53,64,266,	0,206384,207050,208019,208356,208518,209479,
LjG1.1_chr3	411330	621075	NOV.12718.3	0	-	621075	621075	0	7	21,572,149,50,53,64,266,	0,206384,207050,208019,208356,208518,209479,
LjG1.1_chr3	411330	621075	NOV.12718.3	0	-	621075	621075	0	7	21,572,149,50,53,64,266,	0,206384,207050,208019,208356,208518,209479,
LjG1.1_chr3	411330	621075	NOV.12718.3	0	-	621075	621075	0	7	21,572,149,50,53,64,266,	0,206384,207050,208019,208356,208518,209479,
LjG1.1_chr3	411330	621075	NOV.12718.3	0	-	621075	621075	0	7	21,572,149,50,53,64,266,	0,206384,207050,208019,208356,208518,209479,
LjG1.1_chr3	411330	621075	NOV.12718.3	0	-	621075	621075	0	7	21,572,149,50,53,64,266,	0,206384,207050,208019,208356,208518,209479,
LjG1.1_chr3	411330	621075	NOV.12718.3	0	-	621075	621075	0	7	21,572,149,50,53,64,266,	0,206384,207050,208019,208356,208518,209479,
LjG1.1_chr3	411330	621075	NOV.12718.3	0	-	621075	621075	0	7	21,572,149,50,53,64,266,	0,206384,207050,208019,208356,208518,209479,
LjG1.1_chr3	411330	621075	NOV.12718.3	0	-	621075	621075	0	7	21,572,149,50,53,64,266,	0,206384,207050,208019,208356,208518,209479,
LjG1.1_chr3	411330	621075	NOV.12718.3	0	-	621075	621075	0	7	21,572,149,50,53,64,266,	0,206384,207050,208019,208356,208518,209479,
LjG1.1_chr3	422631	422941	NOV.12721.1	0	+	422941	422941	0	1	310,	0,
LjG1.1_chr3	450769	453344	NOV.12727.1	0	-	453344	453344	0	2	470,32,	0,2543,
LjG1.1_chr3	466770	534947	NOV.12728.1	0	+	534947	534947	0	4	12,130,173,393,	0,65455,66764,67784,
LjG1.1_chr3	466770	534947	NOV.12728.1	0	+	534947	534947	0	4	12,130,173,393,	0,65455,66764,67784,
LjG1.1_chr3	466770	534847	NOV.12728.2	0	+	534847	534847	0	4	12,108,173,293,	0,65477,66764,67784,
LjG1.1_chr3	466770	534847	NOV.12728.2	0	+	534847	534847	0	4	12,108,173,293,	0,65477,66764,67784,
LjG1.1_chr3	466770	565607	NOV.12728.3	0	+	565607	565607	0	2	12,337,	0,98500,
LjG1.1_chr3	466770	565607	NOV.12728.3	0	+	565607	565607	0	2	12,337,	0,98500,
LjG1.1_chr3	466770	565607	NOV.12728.3	0	+	565607	565607	0	2	12,337,	0,98500,
LjG1.1_chr3	466770	566369	NOV.12728.4	0	+	566369	566369	0	2	12,1021,	0,98578,
LjG1.1_chr3	466770	566369	NOV.12728.4	0	+	566369	566369	0	2	12,1021,	0,98578,
LjG1.1_chr3	466770	566369	NOV.12728.4	0	+	566369	566369	0	2	12,1021,	0,98578,
LjG1.1_chr3	466770	534814	NOV.12728.5	0	+	534814	534814	0	2	12,210,	0,67834,
LjG1.1_chr3	466770	534814	NOV.12728.5	0	+	534814	534814	0	2	12,210,	0,67834,
LjG1.1_chr3	614748	616768	NOV.12736.1	0	-	616768	616768	0	2	761,524,	0,1496,
LjG1.1_chr3	875531	876857	NOV.12764.1	0	+	876857	876857	0	5	120,66,78,47,108,	0,311,470,1044,1218,
LjG1.1_chr3	875531	876857	NOV.12764.1	0	+	876857	876857	0	5	120,66,78,47,108,	0,311,470,1044,1218,
LjG1.1_chr3	1081588	1093674	NOV.12783.1	0	-	1093674	1093674	0	3	511,93,107,	0,11644,11979,
LjG1.1_chr3	1081588	1093674	NOV.12783.2	0	-	1093674	1093674	0	3	511,93,107,	0,610,11979,
LjG1.1_chr3	1081770	1093674	NOV.12783.3	0	-	1093674	1093674	0	4	224,92,93,107,	0,11271,11462,11797,
LjG1.1_chr3	1086189	1091416	NOV.12784.2	0	+	1091416	1091416	0	4	73,36,46,90,	0,497,4878,5137,
LjG1.1_chr3	1086189	1091418	NOV.12784.3	0	+	1091418	1091418	0	4	73,36,46,92,	0,4399,4878,5137,
LjG1.1_chr3	1093599	1093829	NOV.12785.1	0	+	1093829	1093829	0	1	230,	0,
LjG1.1_chr3	1144585	1204925	NOV.12787.8	0	+	1204925	1204925	0	3	64,197,17,	0,518,60323,
LjG1.1_chr3	1145101	1204925	NOV.12787.9	0	+	1204925	1204925	0	2	255,17,	0,59807,
LjG1.1_chr3	1246400	1246743	NOV.12799.1	0	-	1246743	1246743	0	1	343,	0,
LjG1.1_chr3	1247482	1247762	NOV.12800.1	0	-	1247762	1247762	0	1	280,	0,
LjG1.1_chr3	1483752	1484324	NOV.12823.1	0	-	1484324	1484324	0	2	237,228,	0,344,
LjG1.1_chr3	1483831	1484270	NOV.12823.2	0	-	1484270	1484270	0	2	157,174,	0,265,
LjG1.1_chr3	1717170	1725471	NOV.12846.2	0	+	1725471	1725471	0	2	29,518,	0,7783,
LjG1.1_chr3	1864075	1964514	NOV.12860.1	0	+	1964514	1964514	0	5	61,136,102,360,268,	0,165,389,708,100171,
LjG1.1_chr3	1864075	1964514	NOV.12860.1	0	+	1964514	1964514	0	5	61,136,102,360,268,	0,165,389,708,100171,
LjG1.1_chr3	1864075	1964514	NOV.12860.1	0	+	1964514	1964514	0	5	61,136,102,360,268,	0,165,389,708,100171,
LjG1.1_chr3	1864075	1964514	NOV.12860.1	0	+	1964514	1964514	0	5	61,136,102,360,268,	0,165,389,708,100171,
LjG1.1_chr3	1864075	1964514	NOV.12860.1	0	+	1964514	1964514	0	5	61,136,102,360,268,	0,165,389,708,100171,
LjG1.1_chr3	1864075	1964514	NOV.12860.1	0	+	1964514	1964514	0	5	61,136,102,360,268,	0,165,389,708,100171,
LjG1.1_chr3	1864075	1964514	NOV.12860.1	0	+	1964514	1964514	0	5	61,136,102,360,268,	0,165,389,708,100171,
LjG1.1_chr3	1864075	1964469	NOV.12860.2	0	+	1964469	1964469	0	5	61,136,102,382,221,	0,165,389,708,100173,
LjG1.1_chr3	1864075	1964469	NOV.12860.2	0	+	1964469	1964469	0	5	61,136,102,382,221,	0,165,389,708,100173,
LjG1.1_chr3	1864075	1964469	NOV.12860.2	0	+	1964469	1964469	0	5	61,136,102,382,221,	0,165,389,708,100173,
LjG1.1_chr3	1864075	1964469	NOV.12860.2	0	+	1964469	1964469	0	5	61,136,102,382,221,	0,165,389,708,100173,
LjG1.1_chr3	1864075	1964469	NOV.12860.2	0	+	1964469	1964469	0	5	61,136,102,382,221,	0,165,389,708,100173,
LjG1.1_chr3	1864075	1964469	NOV.12860.2	0	+	1964469	1964469	0	5	61,136,102,382,221,	0,165,389,708,100173,
LjG1.1_chr3	1864075	1964469	NOV.12860.2	0	+	1964469	1964469	0	5	61,136,102,382,221,	0,165,389,708,100173,
LjG1.1_chr3	1864075	1964514	NOV.12860.3	0	+	1964514	1964514	0	5	61,136,102,256,266,	0,165,389,708,100173,
LjG1.1_chr3	1864075	1964514	NOV.12860.3	0	+	1964514	1964514	0	5	61,136,102,256,266,	0,165,389,708,100173,
LjG1.1_chr3	1864075	1964514	NOV.12860.3	0	+	1964514	1964514	0	5	61,136,102,256,266,	0,165,389,708,100173,
LjG1.1_chr3	1864075	1964514	NOV.12860.3	0	+	1964514	1964514	0	5	61,136,102,256,266,	0,165,389,708,100173,
LjG1.1_chr3	1864075	1964514	NOV.12860.3	0	+	1964514	1964514	0	5	61,136,102,256,266,	0,165,389,708,100173,
LjG1.1_chr3	1864075	1964514	NOV.12860.3	0	+	1964514	1964514	0	5	61,136,102,256,266,	0,165,389,708,100173,
LjG1.1_chr3	1864075	1964514	NOV.12860.3	0	+	1964514	1964514	0	5	61,136,102,256,266,	0,165,389,708,100173,
LjG1.1_chr3	1864083	1968431	NOV.12860.4	0	+	1968431	1968431	0	5	53,136,102,268,4184,	0,157,381,700,100164,
LjG1.1_chr3	1864083	1968431	NOV.12860.4	0	+	1968431	1968431	0	5	53,136,102,268,4184,	0,157,381,700,100164,
LjG1.1_chr3	1864083	1968431	NOV.12860.4	0	+	1968431	1968431	0	5	53,136,102,268,4184,	0,157,381,700,100164,
LjG1.1_chr3	1864083	1968431	NOV.12860.4	0	+	1968431	1968431	0	5	53,136,102,268,4184,	0,157,381,700,100164,
LjG1.1_chr3	1864083	1968431	NOV.12860.4	0	+	1968431	1968431	0	5	53,136,102,268,4184,	0,157,381,700,100164,
LjG1.1_chr3	1864083	1968431	NOV.12860.4	0	+	1968431	1968431	0	5	53,136,102,268,4184,	0,157,381,700,100164,
LjG1.1_chr3	1964238	1966376	NOV.12868.2	0	-	1966376	1966376	0	2	281,131,	0,2007,
LjG1.1_chr3	2024735	2024958	NOV.12877.1	0	+	2024958	2024958	0	1	223,	0,
LjG1.1_chr3	2168623	2169290	NOV.12890.1	0	-	2169290	2169290	0	1	667,	0,
LjG1.1_chr3	2168623	2169290	NOV.12890.1	0	-	2169290	2169290	0	1	667,	0,
LjG1.1_chr3	2415939	2420080	NOV.12905.1	0	-	2420080	2420080	0	5	661,239,49,90,76,	0,2440,3122,3609,4065,
LjG1.1_chr3	2416210	2417724	NOV.12905.2	0	-	2417724	2417724	0	2	390,30,	0,1484,
LjG1.1_chr3	2418377	2420034	NOV.12905.3	0	-	2420034	2420034	0	3	233,406,30,	0,914,1627,
LjG1.1_chr3	3047924	3089124	NOV.12956.4	0	+	3089124	3089124	0	6	37,83,64,143,463,17,	0,164,328,691,1476,41183,
LjG1.1_chr3	3047924	3089124	NOV.12956.4	0	+	3089124	3089124	0	6	37,83,64,143,463,17,	0,164,328,691,1476,41183,
LjG1.1_chr3	3048086	3089124	NOV.12956.5	0	+	3089124	3089124	0	5	85,64,143,478,18,	0,166,529,1314,41020,
LjG1.1_chr3	3048086	3089124	NOV.12956.5	0	+	3089124	3089124	0	5	85,64,143,478,18,	0,166,529,1314,41020,
LjG1.1_chr3	3366649	3560761	NOV.12985.1	0	+	3560761	3560761	0	4	113,184,269,25,	0,855,1493,194087,
LjG1.1_chr3	3366649	3560761	NOV.12985.1	0	+	3560761	3560761	0	4	113,184,269,25,	0,855,1493,194087,
LjG1.1_chr3	3366649	3560761	NOV.12985.1	0	+	3560761	3560761	0	4	113,184,269,25,	0,855,1493,194087,
LjG1.1_chr3	3366649	3560761	NOV.12985.1	0	+	3560761	3560761	0	4	113,184,269,25,	0,855,1493,194087,
LjG1.1_chr3	3366649	3560761	NOV.12985.1	0	+	3560761	3560761	0	4	113,184,269,25,	0,855,1493,194087,
LjG1.1_chr3	3366649	3560761	NOV.12985.1	0	+	3560761	3560761	0	4	113,184,269,25,	0,855,1493,194087,
LjG1.1_chr3	3439419	3439660	NOV.12996.1	0	-	3439660	3439660	0	1	241,	0,
LjG1.1_chr3	3439419	3439660	NOV.12996.1	0	-	3439660	3439660	0	1	241,	0,
LjG1.1_chr3	4100984	4185090	NOV.13042.10	0	+	4185090	4185090	0	9	45,73,113,60,48,69,62,334,22,	0,739,938,1168,1812,2323,4111,4257,84084,
LjG1.1_chr3	4100984	4185090	NOV.13042.10	0	+	4185090	4185090	0	9	45,73,113,60,48,69,62,334,22,	0,739,938,1168,1812,2323,4111,4257,84084,
LjG1.1_chr3	4100988	4185088	NOV.13042.11	0	+	4185088	4185088	0	9	41,73,113,60,48,69,62,335,21,	0,735,934,1164,1808,2319,4107,4253,84079,
LjG1.1_chr3	4100988	4185088	NOV.13042.11	0	+	4185088	4185088	0	9	41,73,113,60,48,69,62,335,21,	0,735,934,1164,1808,2319,4107,4253,84079,
LjG1.1_chr3	4101723	4390255	NOV.13042.12	0	+	4390255	4390255	0	8	73,113,60,48,69,62,335,20,	0,199,429,1073,1584,3372,3518,288512,
LjG1.1_chr3	4101723	4390255	NOV.13042.12	0	+	4390255	4390255	0	8	73,113,60,48,69,62,335,20,	0,199,429,1073,1584,3372,3518,288512,
LjG1.1_chr3	4101723	4390255	NOV.13042.12	0	+	4390255	4390255	0	8	73,113,60,48,69,62,335,20,	0,199,429,1073,1584,3372,3518,288512,
LjG1.1_chr3	4101723	4390255	NOV.13042.12	0	+	4390255	4390255	0	8	73,113,60,48,69,62,335,20,	0,199,429,1073,1584,3372,3518,288512,
LjG1.1_chr3	4101723	4390255	NOV.13042.12	0	+	4390255	4390255	0	8	73,113,60,48,69,62,335,20,	0,199,429,1073,1584,3372,3518,288512,
LjG1.1_chr3	4101723	4390255	NOV.13042.12	0	+	4390255	4390255	0	8	73,113,60,48,69,62,335,20,	0,199,429,1073,1584,3372,3518,288512,
LjG1.1_chr3	4101723	4390255	NOV.13042.12	0	+	4390255	4390255	0	8	73,113,60,48,69,62,335,20,	0,199,429,1073,1584,3372,3518,288512,
LjG1.1_chr3	4101723	4390255	NOV.13042.12	0	+	4390255	4390255	0	8	73,113,60,48,69,62,335,20,	0,199,429,1073,1584,3372,3518,288512,
LjG1.1_chr3	4101723	4390255	NOV.13042.12	0	+	4390255	4390255	0	8	73,113,60,48,69,62,335,20,	0,199,429,1073,1584,3372,3518,288512,
LjG1.1_chr3	4101723	4390255	NOV.13042.12	0	+	4390255	4390255	0	8	73,113,60,48,69,62,335,20,	0,199,429,1073,1584,3372,3518,288512,
LjG1.1_chr3	4101723	4390255	NOV.13042.12	0	+	4390255	4390255	0	8	73,113,60,48,69,62,335,20,	0,199,429,1073,1584,3372,3518,288512,
LjG1.1_chr3	4105239	4185089	NOV.13042.13	0	+	4185089	4185089	0	2	333,22,	0,79828,
LjG1.1_chr3	4105239	4185089	NOV.13042.13	0	+	4185089	4185089	0	2	333,22,	0,79828,
LjG1.1_chr3	4100984	4203788	NOV.13042.9	0	+	4203788	4203788	0	9	45,73,113,60,48,69,62,332,17,	0,739,938,1168,1812,2323,4111,4257,102787,
LjG1.1_chr3	4100984	4203788	NOV.13042.9	0	+	4203788	4203788	0	9	45,73,113,60,48,69,62,332,17,	0,739,938,1168,1812,2323,4111,4257,102787,
LjG1.1_chr3	4100984	4203788	NOV.13042.9	0	+	4203788	4203788	0	9	45,73,113,60,48,69,62,332,17,	0,739,938,1168,1812,2323,4111,4257,102787,
LjG1.1_chr3	4379202	4379453	NOV.13074.1	0	-	4379453	4379453	0	1	251,	0,
LjG1.1_chr3	4503646	4504756	NOV.13093.1	0	-	4504756	4504756	0	2	170,38,	0,1072,
LjG1.1_chr3	4512163	4512413	NOV.13095.1	0	-	4512413	4512413	0	1	250,	0,
LjG1.1_chr3	4713710	4774967	NOV.13101.5	0	+	4774967	4774967	0	3	24,651,16,	0,812,61241,
LjG1.1_chr3	4713710	4774967	NOV.13101.5	0	+	4774967	4774967	0	3	24,651,16,	0,812,61241,
LjG1.1_chr3	4713710	4774967	NOV.13101.5	0	+	4774967	4774967	0	3	24,651,16,	0,812,61241,
LjG1.1_chr3	4713710	4774967	NOV.13101.5	0	+	4774967	4774967	0	3	24,651,16,	0,812,61241,
LjG1.1_chr3	4668185	4669506	NOV.13111.1	0	-	4669506	4669506	0	1	1321,	0,
LjG1.1_chr1	18122333	18122891	NOV.1312.1	0	+	18122891	18122891	0	1	558,	0,
LjG1.1_chr3	4844467	4866243	NOV.13126.2	0	+	4866243	4866243	0	5	32,47,109,56,370,	0,20466,20966,21269,21406,
LjG1.1_chr3	5017186	5017539	NOV.13141.1	0	+	5017539	5017539	0	1	353,	0,
LjG1.1_chr3	5103885	5347746	NOV.13153.1	0	-	5347746	5347746	0	2	35,393,	0,243468,
LjG1.1_chr3	5103885	5347746	NOV.13153.1	0	-	5347746	5347746	0	2	35,393,	0,243468,
LjG1.1_chr3	5103885	5347746	NOV.13153.1	0	-	5347746	5347746	0	2	35,393,	0,243468,
LjG1.1_chr3	5103885	5347746	NOV.13153.1	0	-	5347746	5347746	0	2	35,393,	0,243468,
LjG1.1_chr3	5103885	5347746	NOV.13153.1	0	-	5347746	5347746	0	2	35,393,	0,243468,
LjG1.1_chr3	5103885	5347746	NOV.13153.1	0	-	5347746	5347746	0	2	35,393,	0,243468,
LjG1.1_chr3	5103885	5347746	NOV.13153.1	0	-	5347746	5347746	0	2	35,393,	0,243468,
LjG1.1_chr3	5103885	5347746	NOV.13153.1	0	-	5347746	5347746	0	2	35,393,	0,243468,
LjG1.1_chr3	5103885	5347746	NOV.13153.1	0	-	5347746	5347746	0	2	35,393,	0,243468,
LjG1.1_chr3	5103885	5347746	NOV.13153.1	0	-	5347746	5347746	0	2	35,393,	0,243468,
LjG1.1_chr3	5103885	5347746	NOV.13153.1	0	-	5347746	5347746	0	2	35,393,	0,243468,
LjG1.1_chr3	5103885	5347746	NOV.13153.1	0	-	5347746	5347746	0	2	35,393,	0,243468,
LjG1.1_chr3	5103885	5347746	NOV.13153.1	0	-	5347746	5347746	0	2	35,393,	0,243468,
LjG1.1_chr3	5103885	5347746	NOV.13153.1	0	-	5347746	5347746	0	2	35,393,	0,243468,
LjG1.1_chr3	5103899	5349706	NOV.13153.4	0	-	5349706	5349706	0	3	21,378,139,	0,243465,245668,
LjG1.1_chr3	5103899	5349706	NOV.13153.4	0	-	5349706	5349706	0	3	21,378,139,	0,243465,245668,
LjG1.1_chr3	5103899	5349706	NOV.13153.4	0	-	5349706	5349706	0	3	21,378,139,	0,243465,245668,
LjG1.1_chr3	5103899	5349706	NOV.13153.4	0	-	5349706	5349706	0	3	21,378,139,	0,243465,245668,
LjG1.1_chr3	5103899	5349706	NOV.13153.4	0	-	5349706	5349706	0	3	21,378,139,	0,243465,245668,
LjG1.1_chr3	5103899	5349706	NOV.13153.4	0	-	5349706	5349706	0	3	21,378,139,	0,243465,245668,
LjG1.1_chr3	5103899	5349706	NOV.13153.4	0	-	5349706	5349706	0	3	21,378,139,	0,243465,245668,
LjG1.1_chr3	5103899	5349706	NOV.13153.4	0	-	5349706	5349706	0	3	21,378,139,	0,243465,245668,
LjG1.1_chr3	5103899	5349706	NOV.13153.4	0	-	5349706	5349706	0	3	21,378,139,	0,243465,245668,
LjG1.1_chr3	5103899	5349706	NOV.13153.4	0	-	5349706	5349706	0	3	21,378,139,	0,243465,245668,
LjG1.1_chr3	5317613	5349706	NOV.13153.7	0	-	5349706	5349706	0	3	10,379,139,	0,29750,31954,
LjG1.1_chr3	5500916	5595683	NOV.13200.1	0	+	5595683	5595683	0	4	236,100,290,13,	0,350,3305,94754,
LjG1.1_chr3	5500916	5595683	NOV.13200.1	0	+	5595683	5595683	0	4	236,100,290,13,	0,350,3305,94754,
LjG1.1_chr3	5500916	5595683	NOV.13200.1	0	+	5595683	5595683	0	4	236,100,290,13,	0,350,3305,94754,
LjG1.1_chr3	5500916	5595683	NOV.13200.1	0	+	5595683	5595683	0	4	236,100,290,13,	0,350,3305,94754,
LjG1.1_chr3	5500916	5595683	NOV.13200.1	0	+	5595683	5595683	0	4	236,100,290,13,	0,350,3305,94754,
LjG1.1_chr3	5500916	5595683	NOV.13200.1	0	+	5595683	5595683	0	4	236,100,290,13,	0,350,3305,94754,
LjG1.1_chr3	5500916	5595683	NOV.13200.1	0	+	5595683	5595683	0	4	236,100,290,13,	0,350,3305,94754,
LjG1.1_chr3	5500958	5600379	NOV.13200.2	0	+	5600379	5600379	0	4	194,100,262,16,	0,308,3263,99405,
LjG1.1_chr3	5500958	5600379	NOV.13200.2	0	+	5600379	5600379	0	4	194,100,262,16,	0,308,3263,99405,
LjG1.1_chr3	5500958	5600379	NOV.13200.2	0	+	5600379	5600379	0	4	194,100,262,16,	0,308,3263,99405,
LjG1.1_chr3	5500958	5600379	NOV.13200.2	0	+	5600379	5600379	0	4	194,100,262,16,	0,308,3263,99405,
LjG1.1_chr3	5500958	5600379	NOV.13200.2	0	+	5600379	5600379	0	4	194,100,262,16,	0,308,3263,99405,
LjG1.1_chr3	5500958	5600379	NOV.13200.2	0	+	5600379	5600379	0	4	194,100,262,16,	0,308,3263,99405,
LjG1.1_chr1	18286036	18893436	NOV.1320.1	0	-	18893436	18893436	0	3	21,431,36,	0,606267,607364,
LjG1.1_chr1	18286036	18893436	NOV.1320.1	0	-	18893436	18893436	0	3	21,431,36,	0,606267,607364,
LjG1.1_chr1	18286036	18893436	NOV.1320.1	0	-	18893436	18893436	0	3	21,431,36,	0,606267,607364,
LjG1.1_chr1	18286036	18893436	NOV.1320.1	0	-	18893436	18893436	0	3	21,431,36,	0,606267,607364,
LjG1.1_chr1	18286036	18893436	NOV.1320.1	0	-	18893436	18893436	0	3	21,431,36,	0,606267,607364,
LjG1.1_chr1	18286036	18893436	NOV.1320.1	0	-	18893436	18893436	0	3	21,431,36,	0,606267,607364,
LjG1.1_chr1	18286036	18893436	NOV.1320.1	0	-	18893436	18893436	0	3	21,431,36,	0,606267,607364,
LjG1.1_chr1	18286036	18893436	NOV.1320.1	0	-	18893436	18893436	0	3	21,431,36,	0,606267,607364,
LjG1.1_chr1	18286036	18893436	NOV.1320.1	0	-	18893436	18893436	0	3	21,431,36,	0,606267,607364,
LjG1.1_chr1	18286036	18893436	NOV.1320.1	0	-	18893436	18893436	0	3	21,431,36,	0,606267,607364,
LjG1.1_chr1	18286036	18893436	NOV.1320.1	0	-	18893436	18893436	0	3	21,431,36,	0,606267,607364,
LjG1.1_chr1	18286036	18893436	NOV.1320.1	0	-	18893436	18893436	0	3	21,431,36,	0,606267,607364,
LjG1.1_chr1	18286036	18893436	NOV.1320.1	0	-	18893436	18893436	0	3	21,431,36,	0,606267,607364,
LjG1.1_chr1	18286036	18893436	NOV.1320.1	0	-	18893436	18893436	0	3	21,431,36,	0,606267,607364,
LjG1.1_chr1	18286036	18893436	NOV.1320.1	0	-	18893436	18893436	0	3	21,431,36,	0,606267,607364,
LjG1.1_chr1	18286036	18893436	NOV.1320.1	0	-	18893436	18893436	0	3	21,431,36,	0,606267,607364,
LjG1.1_chr3	5509196	5510182	NOV.13203.1	0	-	5510182	5510182	0	1	986,	0,
LjG1.1_chr1	18286040	18590751	NOV.1320.4	0	-	18590751	18590751	0	3	50,772,340,	0,303493,304371,
LjG1.1_chr1	18286040	18590751	NOV.1320.4	0	-	18590751	18590751	0	3	50,772,340,	0,303493,304371,
LjG1.1_chr1	18286040	18590751	NOV.1320.4	0	-	18590751	18590751	0	3	50,772,340,	0,303493,304371,
LjG1.1_chr1	18286040	18590751	NOV.1320.4	0	-	18590751	18590751	0	3	50,772,340,	0,303493,304371,
LjG1.1_chr1	18286040	18590751	NOV.1320.4	0	-	18590751	18590751	0	3	50,772,340,	0,303493,304371,
LjG1.1_chr1	18286040	18590751	NOV.1320.4	0	-	18590751	18590751	0	3	50,772,340,	0,303493,304371,
LjG1.1_chr1	18286040	18590751	NOV.1320.4	0	-	18590751	18590751	0	3	50,772,340,	0,303493,304371,
LjG1.1_chr1	18286040	18590751	NOV.1320.4	0	-	18590751	18590751	0	3	50,772,340,	0,303493,304371,
LjG1.1_chr1	18286040	18590751	NOV.1320.4	0	-	18590751	18590751	0	3	50,772,340,	0,303493,304371,
LjG1.1_chr1	18286040	18590751	NOV.1320.4	0	-	18590751	18590751	0	3	50,772,340,	0,303493,304371,
LjG1.1_chr3	5511228	5511443	NOV.13204.1	0	-	5511443	5511443	0	1	215,	0,
LjG1.1_chr3	5789417	5790973	NOV.13207.26	0	-	5790973	5790973	0	3	997,32,76,	0,1057,1480,
LjG1.1_chr3	5526593	5964658	NOV.13207.5	0	-	5964658	5964658	0	3	32,375,23,	0,262940,438042,
LjG1.1_chr3	5526593	5964658	NOV.13207.5	0	-	5964658	5964658	0	3	32,375,23,	0,262940,438042,
LjG1.1_chr3	5526593	5964658	NOV.13207.5	0	-	5964658	5964658	0	3	32,375,23,	0,262940,438042,
LjG1.1_chr3	5526593	5964658	NOV.13207.5	0	-	5964658	5964658	0	3	32,375,23,	0,262940,438042,
LjG1.1_chr3	5526593	5964658	NOV.13207.5	0	-	5964658	5964658	0	3	32,375,23,	0,262940,438042,
LjG1.1_chr3	5526593	5964658	NOV.13207.5	0	-	5964658	5964658	0	3	32,375,23,	0,262940,438042,
LjG1.1_chr3	5526593	5964658	NOV.13207.5	0	-	5964658	5964658	0	3	32,375,23,	0,262940,438042,
LjG1.1_chr3	5526593	5964658	NOV.13207.5	0	-	5964658	5964658	0	3	32,375,23,	0,262940,438042,
LjG1.1_chr3	5526593	5964658	NOV.13207.5	0	-	5964658	5964658	0	3	32,375,23,	0,262940,438042,
LjG1.1_chr3	5526593	5964658	NOV.13207.5	0	-	5964658	5964658	0	3	32,375,23,	0,262940,438042,
LjG1.1_chr3	5526593	5964658	NOV.13207.5	0	-	5964658	5964658	0	3	32,375,23,	0,262940,438042,
LjG1.1_chr3	5526593	5964658	NOV.13207.5	0	-	5964658	5964658	0	3	32,375,23,	0,262940,438042,
LjG1.1_chr3	5526593	5964658	NOV.13207.5	0	-	5964658	5964658	0	3	32,375,23,	0,262940,438042,
LjG1.1_chr3	5526593	5964658	NOV.13207.5	0	-	5964658	5964658	0	3	32,375,23,	0,262940,438042,
LjG1.1_chr3	5526593	5964658	NOV.13207.5	0	-	5964658	5964658	0	3	32,375,23,	0,262940,438042,
LjG1.1_chr3	5526593	5964658	NOV.13207.5	0	-	5964658	5964658	0	3	32,375,23,	0,262940,438042,
LjG1.1_chr3	5526593	5964658	NOV.13207.5	0	-	5964658	5964658	0	3	32,375,23,	0,262940,438042,
LjG1.1_chr3	5526593	5964658	NOV.13207.5	0	-	5964658	5964658	0	3	32,375,23,	0,262940,438042,
LjG1.1_chr3	5526593	5964658	NOV.13207.5	0	-	5964658	5964658	0	3	32,375,23,	0,262940,438042,
LjG1.1_chr3	5526593	5964658	NOV.13207.5	0	-	5964658	5964658	0	3	32,375,23,	0,262940,438042,
LjG1.1_chr3	5999295	5999499	NOV.13256.1	0	+	5999499	5999499	0	1	204,	0,
LjG1.1_chr3	5999295	5999499	NOV.13256.1	0	+	5999499	5999499	0	1	204,	0,
LjG1.1_chr3	6014373	6014945	NOV.13258.1	0	+	6014945	6014945	0	1	572,	0,
LjG1.1_chr1	18359195	18360239	NOV.1327.1	0	-	18360239	18360239	0	2	335,177,	0,867,
LjG1.1_chr3	6247847	6248242	NOV.13272.1	0	+	6248242	6248242	0	1	395,	0,
LjG1.1_chr3	6735641	6736048	NOV.13316.1	0	+	6736048	6736048	0	1	407,	0,
LjG1.1_chr3	6735641	6736048	NOV.13316.1	0	+	6736048	6736048	0	1	407,	0,
LjG1.1_chr3	7267389	7267659	NOV.13354.1	0	-	7267659	7267659	0	1	270,	0,
LjG1.1_chr3	7321899	7396304	NOV.13358.1	0	+	7396304	7396304	0	2	10,499,	0,73906,
LjG1.1_chr3	7352235	7400027	NOV.13361.2	0	-	7400027	7400027	0	8	16,303,104,156,72,48,48,73,	0,45363,46294,46494,46749,47052,47180,47719,
LjG1.1_chr3	7352235	7400027	NOV.13361.2	0	-	7400027	7400027	0	8	16,303,104,156,72,48,48,73,	0,45363,46294,46494,46749,47052,47180,47719,
LjG1.1_chr3	7438301	7439658	NOV.13367.1	0	-	7439658	7439658	0	1	1357,	0,
LjG1.1_chr3	7438301	7439658	NOV.13367.1	0	-	7439658	7439658	0	1	1357,	0,
LjG1.1_chr3	7438886	7439655	NOV.13367.2	0	-	7439655	7439655	0	2	471,111,	0,658,
LjG1.1_chr3	7438886	7439655	NOV.13367.2	0	-	7439655	7439655	0	2	471,111,	0,658,
LjG1.1_chr3	7456810	7457685	NOV.13371.1	0	+	7457685	7457685	0	2	240,13,	0,862,
LjG1.1_chr3	7615175	7615379	NOV.13383.1	0	-	7615379	7615379	0	1	204,	0,
LjG1.1_chr3	7761605	7839054	NOV.13397.2	0	+	7839054	7839054	0	3	250,179,15,	0,13002,77434,
LjG1.1_chr3	7761605	7839054	NOV.13397.2	0	+	7839054	7839054	0	3	250,179,15,	0,13002,77434,
LjG1.1_chr3	7761605	7839054	NOV.13397.2	0	+	7839054	7839054	0	3	250,179,15,	0,13002,77434,
LjG1.1_chr3	7772796	7848006	NOV.13397.3	0	+	7848006	7848006	0	3	250,178,16,	0,1811,75194,
LjG1.1_chr3	7772796	7848006	NOV.13397.3	0	+	7848006	7848006	0	3	250,178,16,	0,1811,75194,
LjG1.1_chr3	7772991	7827235	NOV.13397.4	0	+	7827235	7827235	0	3	140,306,19,	0,1609,54225,
LjG1.1_chr3	7817170	7817778	NOV.13401.1	0	-	7817778	7817778	0	1	608,	0,
LjG1.1_chr3	8539522	8716459	NOV.13452.2	0	-	8716459	8716459	0	2	246,518,	0,176419,
LjG1.1_chr3	8539522	8716459	NOV.13452.2	0	-	8716459	8716459	0	2	246,518,	0,176419,
LjG1.1_chr3	8539522	8716459	NOV.13452.2	0	-	8716459	8716459	0	2	246,518,	0,176419,
LjG1.1_chr3	8539522	8716459	NOV.13452.2	0	-	8716459	8716459	0	2	246,518,	0,176419,
LjG1.1_chr3	8539522	8716459	NOV.13452.2	0	-	8716459	8716459	0	2	246,518,	0,176419,
LjG1.1_chr3	8539522	8716459	NOV.13452.2	0	-	8716459	8716459	0	2	246,518,	0,176419,
LjG1.1_chr3	8539522	8716459	NOV.13452.2	0	-	8716459	8716459	0	2	246,518,	0,176419,
LjG1.1_chr3	8539522	8716459	NOV.13452.2	0	-	8716459	8716459	0	2	246,518,	0,176419,
LjG1.1_chr3	8539522	8716459	NOV.13452.2	0	-	8716459	8716459	0	2	246,518,	0,176419,
LjG1.1_chr3	8539726	8716494	NOV.13452.3	0	-	8716494	8716494	0	2	42,536,	0,176232,
LjG1.1_chr3	8539726	8716494	NOV.13452.3	0	-	8716494	8716494	0	2	42,536,	0,176232,
LjG1.1_chr3	8539726	8716494	NOV.13452.3	0	-	8716494	8716494	0	2	42,536,	0,176232,
LjG1.1_chr3	8539726	8716494	NOV.13452.3	0	-	8716494	8716494	0	2	42,536,	0,176232,
LjG1.1_chr3	8539726	8716494	NOV.13452.3	0	-	8716494	8716494	0	2	42,536,	0,176232,
LjG1.1_chr3	8539726	8716494	NOV.13452.3	0	-	8716494	8716494	0	2	42,536,	0,176232,
LjG1.1_chr3	8539726	8716494	NOV.13452.3	0	-	8716494	8716494	0	2	42,536,	0,176232,
LjG1.1_chr3	8539726	8716494	NOV.13452.3	0	-	8716494	8716494	0	2	42,536,	0,176232,
LjG1.1_chr3	8539728	8720331	NOV.13452.4	0	-	8720331	8720331	0	3	39,207,506,	0,176175,180097,
LjG1.1_chr3	8539728	8720331	NOV.13452.4	0	-	8720331	8720331	0	3	39,207,506,	0,176175,180097,
LjG1.1_chr3	8539728	8720331	NOV.13452.4	0	-	8720331	8720331	0	3	39,207,506,	0,176175,180097,
LjG1.1_chr3	8539728	8720331	NOV.13452.4	0	-	8720331	8720331	0	3	39,207,506,	0,176175,180097,
LjG1.1_chr3	8539728	8720331	NOV.13452.4	0	-	8720331	8720331	0	3	39,207,506,	0,176175,180097,
LjG1.1_chr3	8539728	8720331	NOV.13452.4	0	-	8720331	8720331	0	3	39,207,506,	0,176175,180097,
LjG1.1_chr3	8539728	8720331	NOV.13452.4	0	-	8720331	8720331	0	3	39,207,506,	0,176175,180097,
LjG1.1_chr3	8539728	8720331	NOV.13452.4	0	-	8720331	8720331	0	3	39,207,506,	0,176175,180097,
LjG1.1_chr3	8539728	8720331	NOV.13452.4	0	-	8720331	8720331	0	3	39,207,506,	0,176175,180097,
LjG1.1_chr3	8539728	8720331	NOV.13452.4	0	-	8720331	8720331	0	3	39,207,506,	0,176175,180097,
LjG1.1_chr3	8539179	8540302	NOV.13453.1	0	+	8540302	8540302	0	1	1123,	0,
LjG1.1_chr3	8716118	8716345	NOV.13471.1	0	+	8716345	8716345	0	1	227,	0,
LjG1.1_chr3	8907858	8908106	NOV.13482.1	0	-	8908106	8908106	0	1	248,	0,
LjG1.1_chr3	8907858	8908106	NOV.13482.1	0	-	8908106	8908106	0	1	248,	0,
LjG1.1_chr3	8925351	8925753	NOV.13483.1	0	-	8925753	8925753	0	1	402,	0,
LjG1.1_chr3	8996747	8996993	NOV.13492.1	0	-	8996993	8996993	0	1	246,	0,
LjG1.1_chr3	9214129	9214359	NOV.13506.1	0	-	9214359	9214359	0	1	230,	0,
LjG1.1_chr3	9214129	9214359	NOV.13506.1	0	-	9214359	9214359	0	1	230,	0,
LjG1.1_chr3	9567542	9568200	NOV.13528.1	0	-	9568200	9568200	0	1	658,	0,
LjG1.1_chr3	9669577	9943704	NOV.13536.3	0	+	9943704	9943704	0	4	168,62,646,20,	0,413,2254,274107,
LjG1.1_chr3	9669577	9943704	NOV.13536.3	0	+	9943704	9943704	0	4	168,62,646,20,	0,413,2254,274107,
LjG1.1_chr3	9669577	9943704	NOV.13536.3	0	+	9943704	9943704	0	4	168,62,646,20,	0,413,2254,274107,
LjG1.1_chr3	9669577	9943704	NOV.13536.3	0	+	9943704	9943704	0	4	168,62,646,20,	0,413,2254,274107,
LjG1.1_chr3	9745046	9943704	NOV.13536.5	0	+	9943704	9943704	0	3	246,466,20,	0,347,198638,
LjG1.1_chr3	9745046	9943704	NOV.13536.5	0	+	9943704	9943704	0	3	246,466,20,	0,347,198638,
LjG1.1_chr3	9745046	9943704	NOV.13536.5	0	+	9943704	9943704	0	3	246,466,20,	0,347,198638,
LjG1.1_chr3	9745046	9943704	NOV.13536.5	0	+	9943704	9943704	0	3	246,466,20,	0,347,198638,
LjG1.1_chr3	9745046	9943704	NOV.13536.5	0	+	9943704	9943704	0	3	246,466,20,	0,347,198638,
LjG1.1_chr3	9745046	9943704	NOV.13536.5	0	+	9943704	9943704	0	3	246,466,20,	0,347,198638,
LjG1.1_chr3	9745046	9943704	NOV.13536.5	0	+	9943704	9943704	0	3	246,466,20,	0,347,198638,
LjG1.1_chr3	9745392	9764667	NOV.13536.8	0	+	9764667	9764667	0	2	464,12,	0,19263,
LjG1.1_chr3	9957724	9958713	NOV.13554.1	0	+	9958713	9958713	0	2	98,103,	0,886,
LjG1.1_chr3	10382606	10383611	NOV.13586.1	0	-	10383611	10383611	0	1	1005,	0,
LjG1.1_chr3	11981268	11982127	NOV.13635.1	0	+	11982127	11982127	0	1	859,	0,
LjG1.1_chr3	12027136	12027396	NOV.13638.1	0	-	12027396	12027396	0	1	260,	0,
LjG1.1_chr3	12508655	12509523	NOV.13678.1	0	+	12509523	12509523	0	1	868,	0,
LjG1.1_chr3	12831922	12832286	NOV.13705.1	0	-	12832286	12832286	0	1	364,	0,
LjG1.1_chr1	19142908	19144296	NOV.1372.1	0	-	19144296	19144296	0	2	359,84,	0,1304,
LjG1.1_chr3	13081796	13083164	NOV.13725.2	0	-	13083164	13083164	0	2	679,36,	0,1332,
LjG1.1_chr3	13081796	13083164	NOV.13725.2	0	-	13083164	13083164	0	2	679,36,	0,1332,
LjG1.1_chr3	13081796	13083164	NOV.13725.3	0	-	13083164	13083164	0	2	598,36,	0,1332,
LjG1.1_chr3	13081796	13083164	NOV.13725.3	0	-	13083164	13083164	0	2	598,36,	0,1332,
LjG1.1_chr3	13380421	13416544	NOV.13751.1	0	-	13416544	13416544	0	2	14,824,	0,35299,
LjG1.1_chr3	13380421	13416544	NOV.13751.1	0	-	13416544	13416544	0	2	14,824,	0,35299,
LjG1.1_chr3	13380422	13524106	NOV.13751.4	0	-	13524106	13524106	0	3	20,701,478,	0,142268,143206,
LjG1.1_chr3	13380422	13524106	NOV.13751.4	0	-	13524106	13524106	0	3	20,701,478,	0,142268,143206,
LjG1.1_chr3	13380422	13524106	NOV.13751.4	0	-	13524106	13524106	0	3	20,701,478,	0,142268,143206,
LjG1.1_chr3	13380422	13526936	NOV.13751.5	0	-	13526936	13526936	0	3	20,618,147,	0,142268,146367,
LjG1.1_chr3	13380422	13526936	NOV.13751.5	0	-	13526936	13526936	0	3	20,618,147,	0,142268,146367,
LjG1.1_chr3	13380422	13526936	NOV.13751.5	0	-	13526936	13526936	0	3	20,618,147,	0,142268,146367,
LjG1.1_chr3	13404331	13494174	NOV.13752.11	0	+	13494174	13494174	0	3	377,488,13,	0,824,89830,
LjG1.1_chr3	13404331	13494174	NOV.13752.11	0	+	13494174	13494174	0	3	377,488,13,	0,824,89830,
LjG1.1_chr3	13404331	13494174	NOV.13752.11	0	+	13494174	13494174	0	3	377,488,13,	0,824,89830,
LjG1.1_chr3	13522886	13523545	NOV.13759.1	0	+	13523545	13523545	0	1	659,	0,
LjG1.1_chr3	13523854	13524420	NOV.13760.1	0	+	13524420	13524420	0	1	566,	0,
LjG1.1_chr3	13525024	13526327	NOV.13761.1	0	+	13526327	13526327	0	1	1303,	0,
LjG1.1_chr3	13903400	14134568	NOV.13777.22	0	+	14134568	14134568	0	4	10,342,434,30,	0,94902,95860,231138,
LjG1.1_chr3	13903400	14134568	NOV.13777.22	0	+	14134568	14134568	0	4	10,342,434,30,	0,94902,95860,231138,
LjG1.1_chr3	13903400	14134568	NOV.13777.22	0	+	14134568	14134568	0	4	10,342,434,30,	0,94902,95860,231138,
LjG1.1_chr3	13903400	14134568	NOV.13777.22	0	+	14134568	14134568	0	4	10,342,434,30,	0,94902,95860,231138,
LjG1.1_chr3	13964451	14134566	NOV.13777.30	0	+	14134566	14134566	0	4	109,85,376,29,	0,225,651,170086,
LjG1.1_chr3	13964451	14134566	NOV.13777.30	0	+	14134566	14134566	0	4	109,85,376,29,	0,225,651,170086,
LjG1.1_chr3	13964451	14134566	NOV.13777.30	0	+	14134566	14134566	0	4	109,85,376,29,	0,225,651,170086,
LjG1.1_chr3	13964451	14134566	NOV.13777.30	0	+	14134566	14134566	0	4	109,85,376,29,	0,225,651,170086,
LjG1.1_chr3	13964451	14134566	NOV.13777.31	0	+	14134566	14134566	0	4	109,85,377,30,	0,225,651,170085,
LjG1.1_chr3	13964451	14134566	NOV.13777.31	0	+	14134566	14134566	0	4	109,85,377,30,	0,225,651,170085,
LjG1.1_chr3	13964451	14134566	NOV.13777.31	0	+	14134566	14134566	0	4	109,85,377,30,	0,225,651,170085,
LjG1.1_chr3	13964451	14134566	NOV.13777.31	0	+	14134566	14134566	0	4	109,85,377,30,	0,225,651,170085,
LjG1.1_chr3	13654850	13705744	NOV.13780.1	0	-	13705744	13705744	0	3	330,258,87,	0,49009,50807,
LjG1.1_chr3	13672830	13674962	NOV.13783.1	0	+	13674962	13674962	0	2	36,424,	0,1708,
LjG1.1_chr3	13958521	13971721	NOV.13791.10	0	-	13971721	13971721	0	5	14,43,57,149,78,	0,12030,12412,12557,13122,
LjG1.1_chr3	13886538	13970992	NOV.13791.3	0	-	13970992	13970992	0	4	15,348,39,59,	0,83576,84017,84395,
LjG1.1_chr3	13886538	13970992	NOV.13791.3	0	-	13970992	13970992	0	4	15,348,39,59,	0,83576,84017,84395,
LjG1.1_chr3	13886538	13970992	NOV.13791.3	0	-	13970992	13970992	0	4	15,348,39,59,	0,83576,84017,84395,
LjG1.1_chr3	13886538	13970992	NOV.13791.3	0	-	13970992	13970992	0	4	15,348,39,59,	0,83576,84017,84395,
LjG1.1_chr3	13886538	13970992	NOV.13791.3	0	-	13970992	13970992	0	4	15,348,39,59,	0,83576,84017,84395,
LjG1.1_chr3	13886538	13970992	NOV.13791.3	0	-	13970992	13970992	0	4	15,348,39,59,	0,83576,84017,84395,
LjG1.1_chr3	13886538	13970992	NOV.13791.3	0	-	13970992	13970992	0	4	15,348,39,59,	0,83576,84017,84395,
LjG1.1_chr3	13886774	13970992	NOV.13791.6	0	-	13970992	13970992	0	4	18,390,39,59,	0,83298,83781,84159,
LjG1.1_chr3	13886774	13970992	NOV.13791.6	0	-	13970992	13970992	0	4	18,390,39,59,	0,83298,83781,84159,
LjG1.1_chr3	13886774	13970992	NOV.13791.6	0	-	13970992	13970992	0	4	18,390,39,59,	0,83298,83781,84159,
LjG1.1_chr3	13886774	13970992	NOV.13791.6	0	-	13970992	13970992	0	4	18,390,39,59,	0,83298,83781,84159,
LjG1.1_chr3	13886774	13970992	NOV.13791.6	0	-	13970992	13970992	0	4	18,390,39,59,	0,83298,83781,84159,
LjG1.1_chr3	13886774	13970992	NOV.13791.6	0	-	13970992	13970992	0	4	18,390,39,59,	0,83298,83781,84159,
LjG1.1_chr3	13886774	13970992	NOV.13791.6	0	-	13970992	13970992	0	4	18,390,39,59,	0,83298,83781,84159,
LjG1.1_chr3	13886774	13970992	NOV.13791.6	0	-	13970992	13970992	0	4	18,390,39,59,	0,83298,83781,84159,
LjG1.1_chr3	13886774	13970992	NOV.13791.6	0	-	13970992	13970992	0	4	18,390,39,59,	0,83298,83781,84159,
LjG1.1_chr3	13886774	13970992	NOV.13791.6	0	-	13970992	13970992	0	4	18,390,39,59,	0,83298,83781,84159,
LjG1.1_chr3	13973559	13981360	NOV.13803.2	0	-	13981360	13981360	0	3	17,445,105,	0,7166,7696,
LjG1.1_chr3	13973559	13981360	NOV.13803.2	0	-	13981360	13981360	0	3	17,445,105,	0,7166,7696,
LjG1.1_chr3	13970176	13970584	NOV.13805.1	0	+	13970584	13970584	0	2	286,29,	0,379,
LjG1.1_chr3	14023204	14023483	NOV.13808.1	0	-	14023483	14023483	0	1	279,	0,
LjG1.1_chloro	148406	148708	NOV.138.1	0	-	148708	148708	0	1	302,	0,
LjG1.1_chr3	14113880	14114144	NOV.13815.1	0	-	14114144	14114144	0	1	264,	0,
LjG1.1_chr3	14169731	14174724	NOV.13823.2	0	+	14174724	14174724	0	3	210,272,17,	0,473,4976,
LjG1.1_chr3	14169731	14174724	NOV.13823.2	0	+	14174724	14174724	0	3	210,272,17,	0,473,4976,
LjG1.1_chr3	14171239	14173499	NOV.13824.1	0	-	14173499	14173499	0	2	605,931,	0,1329,
LjG1.1_chr3	14246117	14246363	NOV.13835.1	0	-	14246363	14246363	0	1	246,	0,
LjG1.1_chr3	14453068	14454304	NOV.13849.1	0	-	14454304	14454304	0	2	479,41,	0,1195,
LjG1.1_chr3	14690357	14690815	NOV.13870.1	0	+	14690815	14690815	0	1	458,	0,
LjG1.1_chr3	14732593	14734242	NOV.13873.1	0	+	14734242	14734242	0	1	1649,	0,
LjG1.1_chr3	15056967	15057815	NOV.13899.1	0	-	15057815	15057815	0	2	477,153,	0,695,
LjG1.1_chr3	15058378	15058613	NOV.13900.1	0	-	15058613	15058613	0	1	235,	0,
LjG1.1_chr1	19607118	19865684	NOV.1390.3	0	-	19865684	19865684	0	2	60,204,	0,258362,
LjG1.1_chr1	19607118	19865684	NOV.1390.3	0	-	19865684	19865684	0	2	60,204,	0,258362,
LjG1.1_chr1	19607118	19865684	NOV.1390.3	0	-	19865684	19865684	0	2	60,204,	0,258362,
LjG1.1_chr1	19607118	19865684	NOV.1390.3	0	-	19865684	19865684	0	2	60,204,	0,258362,
LjG1.1_chr1	19607118	19865684	NOV.1390.3	0	-	19865684	19865684	0	2	60,204,	0,258362,
LjG1.1_chr1	19607118	19865684	NOV.1390.3	0	-	19865684	19865684	0	2	60,204,	0,258362,
LjG1.1_chr1	19607118	19865684	NOV.1390.3	0	-	19865684	19865684	0	2	60,204,	0,258362,
LjG1.1_chr1	19607118	19865684	NOV.1390.3	0	-	19865684	19865684	0	2	60,204,	0,258362,
LjG1.1_chr1	19607118	19865684	NOV.1390.3	0	-	19865684	19865684	0	2	60,204,	0,258362,
LjG1.1_chr1	19607118	19865684	NOV.1390.3	0	-	19865684	19865684	0	2	60,204,	0,258362,
LjG1.1_chr1	19607118	19865684	NOV.1390.3	0	-	19865684	19865684	0	2	60,204,	0,258362,
LjG1.1_chr1	19607118	19865684	NOV.1390.3	0	-	19865684	19865684	0	2	60,204,	0,258362,
LjG1.1_chr3	15135855	15205904	NOV.13905.10	0	-	15205904	15205904	0	3	37,520,17,	0,64737,70032,
LjG1.1_chr3	15135855	15205904	NOV.13905.10	0	-	15205904	15205904	0	3	37,520,17,	0,64737,70032,
LjG1.1_chr3	15135855	15205904	NOV.13905.10	0	-	15205904	15205904	0	3	37,520,17,	0,64737,70032,
LjG1.1_chr3	15135855	15205904	NOV.13905.10	0	-	15205904	15205904	0	3	37,520,17,	0,64737,70032,
LjG1.1_chr3	15135856	15285266	NOV.13905.11	0	-	15285266	15285266	0	2	37,445,	0,148965,
LjG1.1_chr3	15135856	15285266	NOV.13905.11	0	-	15285266	15285266	0	2	37,445,	0,148965,
LjG1.1_chr3	15135856	15285266	NOV.13905.11	0	-	15285266	15285266	0	2	37,445,	0,148965,
LjG1.1_chr3	15135856	15285266	NOV.13905.11	0	-	15285266	15285266	0	2	37,445,	0,148965,
LjG1.1_chr3	15135856	15285266	NOV.13905.11	0	-	15285266	15285266	0	2	37,445,	0,148965,
LjG1.1_chr3	15135856	15285266	NOV.13905.11	0	-	15285266	15285266	0	2	37,445,	0,148965,
LjG1.1_chr3	15135856	15285266	NOV.13905.11	0	-	15285266	15285266	0	2	37,445,	0,148965,
LjG1.1_chr3	15135856	15285266	NOV.13905.11	0	-	15285266	15285266	0	2	37,445,	0,148965,
LjG1.1_chr3	15135856	15285266	NOV.13905.11	0	-	15285266	15285266	0	2	37,445,	0,148965,
LjG1.1_chr3	15135857	15258626	NOV.13905.12	0	-	15258626	15258626	0	3	35,650,111,	0,121314,122658,
LjG1.1_chr3	15135857	15258626	NOV.13905.12	0	-	15258626	15258626	0	3	35,650,111,	0,121314,122658,
LjG1.1_chr3	15135857	15258626	NOV.13905.12	0	-	15258626	15258626	0	3	35,650,111,	0,121314,122658,
LjG1.1_chr3	15135857	15258626	NOV.13905.12	0	-	15258626	15258626	0	3	35,650,111,	0,121314,122658,
LjG1.1_chr3	15135857	15258626	NOV.13905.12	0	-	15258626	15258626	0	3	35,650,111,	0,121314,122658,
LjG1.1_chr3	15135857	15258626	NOV.13905.12	0	-	15258626	15258626	0	3	35,650,111,	0,121314,122658,
LjG1.1_chr3	15135857	15258626	NOV.13905.12	0	-	15258626	15258626	0	3	35,650,111,	0,121314,122658,
LjG1.1_chr3	15135851	15258626	NOV.13905.2	0	-	15258626	15258626	0	4	41,463,182,111,	0,121229,121788,122664,
LjG1.1_chr3	15135851	15258626	NOV.13905.2	0	-	15258626	15258626	0	4	41,463,182,111,	0,121229,121788,122664,
LjG1.1_chr3	15135851	15258626	NOV.13905.2	0	-	15258626	15258626	0	4	41,463,182,111,	0,121229,121788,122664,
LjG1.1_chr3	15135851	15258626	NOV.13905.2	0	-	15258626	15258626	0	4	41,463,182,111,	0,121229,121788,122664,
LjG1.1_chr3	15135851	15258626	NOV.13905.2	0	-	15258626	15258626	0	4	41,463,182,111,	0,121229,121788,122664,
LjG1.1_chr3	15135851	15258626	NOV.13905.2	0	-	15258626	15258626	0	4	41,463,182,111,	0,121229,121788,122664,
LjG1.1_chr3	15135852	15259160	NOV.13905.4	0	-	15259160	15259160	0	5	40,407,182,107,154,	0,121284,121787,122663,123154,
LjG1.1_chr3	15135852	15259160	NOV.13905.4	0	-	15259160	15259160	0	5	40,407,182,107,154,	0,121284,121787,122663,123154,
LjG1.1_chr3	15135852	15259160	NOV.13905.4	0	-	15259160	15259160	0	5	40,407,182,107,154,	0,121284,121787,122663,123154,
LjG1.1_chr3	15135852	15259160	NOV.13905.4	0	-	15259160	15259160	0	5	40,407,182,107,154,	0,121284,121787,122663,123154,
LjG1.1_chr3	15135852	15259160	NOV.13905.4	0	-	15259160	15259160	0	5	40,407,182,107,154,	0,121284,121787,122663,123154,
LjG1.1_chr3	15135852	15259160	NOV.13905.4	0	-	15259160	15259160	0	5	40,407,182,107,154,	0,121284,121787,122663,123154,
LjG1.1_chr3	15790461	15791243	NOV.13945.1	0	-	15791243	15791243	0	1	782,	0,
LjG1.1_chr3	15791465	15793206	NOV.13946.1	0	-	15793206	15793206	0	2	712,27,	0,1714,
LjG1.1_chr3	15890626	15891460	NOV.13954.1	0	-	15891460	15891460	0	1	834,	0,
LjG1.1_chr3	15903745	15903948	NOV.13956.1	0	-	15903948	15903948	0	1	203,	0,
LjG1.1_chr3	16417454	16417959	NOV.13974.1	0	-	16417959	16417959	0	3	73,166,21,	0,218,484,
LjG1.1_chr3	17413683	17456270	NOV.14002.10	0	+	17456270	17456270	0	2	303,26,	0,42561,
LjG1.1_chr3	17413683	17456270	NOV.14002.10	0	+	17456270	17456270	0	2	303,26,	0,42561,
LjG1.1_chr3	17413683	17456270	NOV.14002.10	0	+	17456270	17456270	0	2	303,26,	0,42561,
LjG1.1_chr3	17412913	17456270	NOV.14002.9	0	+	17456270	17456270	0	4	65,66,304,27,	0,574,771,43330,
LjG1.1_chr3	17412913	17456270	NOV.14002.9	0	+	17456270	17456270	0	4	65,66,304,27,	0,574,771,43330,
LjG1.1_chr3	17412913	17456270	NOV.14002.9	0	+	17456270	17456270	0	4	65,66,304,27,	0,574,771,43330,
LjG1.1_chr1	19735545	19795647	NOV.1402.1	0	+	19795647	19795647	0	2	375,13,	0,60089,
LjG1.1_chr1	19735545	19795647	NOV.1402.1	0	+	19795647	19795647	0	2	375,13,	0,60089,
LjG1.1_chr1	19735545	19795647	NOV.1402.1	0	+	19795647	19795647	0	2	375,13,	0,60089,
LjG1.1_chr1	19735545	19795647	NOV.1402.1	0	+	19795647	19795647	0	2	375,13,	0,60089,
LjG1.1_chr3	18296951	18297171	NOV.14040.1	0	-	18297171	18297171	0	1	220,	0,
LjG1.1_chr3	18296951	18297171	NOV.14040.1	0	-	18297171	18297171	0	1	220,	0,
LjG1.1_chr3	18296951	18297171	NOV.14040.1	0	-	18297171	18297171	0	1	220,	0,
LjG1.1_chr3	18296951	18297171	NOV.14040.1	0	-	18297171	18297171	0	1	220,	0,
LjG1.1_chr3	18717827	18718216	NOV.14065.1	0	-	18718216	18718216	0	1	389,	0,
LjG1.1_chr3	18722380	18722650	NOV.14066.1	0	-	18722650	18722650	0	1	270,	0,
LjG1.1_chr3	18836914	18922948	NOV.14072.1	0	+	18922948	18922948	0	5	12,74,115,16,337,	0,82280,83829,84087,85697,
LjG1.1_chr3	18929098	18942733	NOV.14082.1	0	+	18942733	18942733	0	3	122,361,10,	0,257,13625,
LjG1.1_chr3	18929098	18942733	NOV.14082.1	0	+	18942733	18942733	0	3	122,361,10,	0,257,13625,
LjG1.1_chr3	18929118	19113190	NOV.14082.2	0	+	19113190	19113190	0	3	102,385,20,	0,237,184052,
LjG1.1_chr3	18929118	19113190	NOV.14082.2	0	+	19113190	19113190	0	3	102,385,20,	0,237,184052,
LjG1.1_chr3	18929118	19113190	NOV.14082.2	0	+	19113190	19113190	0	3	102,385,20,	0,237,184052,
LjG1.1_chr3	18929118	19113190	NOV.14082.2	0	+	19113190	19113190	0	3	102,385,20,	0,237,184052,
LjG1.1_chr3	18991360	19389739	NOV.14085.2	0	+	19389739	19389739	0	2	1064,58,	0,398321,
LjG1.1_chr3	18991360	19389739	NOV.14085.2	0	+	19389739	19389739	0	2	1064,58,	0,398321,
LjG1.1_chr3	18991360	19389739	NOV.14085.2	0	+	19389739	19389739	0	2	1064,58,	0,398321,
LjG1.1_chr3	18991360	19389739	NOV.14085.2	0	+	19389739	19389739	0	2	1064,58,	0,398321,
LjG1.1_chr3	18991360	19389739	NOV.14085.2	0	+	19389739	19389739	0	2	1064,58,	0,398321,
LjG1.1_chr3	18991360	19389739	NOV.14085.2	0	+	19389739	19389739	0	2	1064,58,	0,398321,
LjG1.1_chr3	18991360	19389739	NOV.14085.2	0	+	19389739	19389739	0	2	1064,58,	0,398321,
LjG1.1_chr3	18991360	19389739	NOV.14085.2	0	+	19389739	19389739	0	2	1064,58,	0,398321,
LjG1.1_chr3	18991360	19389739	NOV.14085.2	0	+	19389739	19389739	0	2	1064,58,	0,398321,
LjG1.1_chr3	18991360	19389739	NOV.14085.2	0	+	19389739	19389739	0	2	1064,58,	0,398321,
LjG1.1_chr3	18991360	19389739	NOV.14085.2	0	+	19389739	19389739	0	2	1064,58,	0,398321,
LjG1.1_chr3	18991360	19389739	NOV.14085.2	0	+	19389739	19389739	0	2	1064,58,	0,398321,
LjG1.1_chr3	18991360	19389739	NOV.14085.2	0	+	19389739	19389739	0	2	1064,58,	0,398321,
LjG1.1_chr3	18991360	19389739	NOV.14085.2	0	+	19389739	19389739	0	2	1064,58,	0,398321,
LjG1.1_chr3	18991360	19389739	NOV.14085.2	0	+	19389739	19389739	0	2	1064,58,	0,398321,
LjG1.1_chr3	19166327	19166614	NOV.14096.1	0	-	19166614	19166614	0	1	287,	0,
LjG1.1_chr3	19803445	19804081	NOV.14130.1	0	+	19804081	19804081	0	1	636,	0,
LjG1.1_chr3	20146906	20148096	NOV.14146.1	0	+	20148096	20148096	0	2	442,168,	0,1022,
LjG1.1_chr3	20157634	20160056	NOV.14147.1	0	+	20160056	20160056	0	5	272,54,215,87,103,	0,1027,1163,1855,2319,
LjG1.1_chr1	20235423	20473545	NOV.1415.1	0	+	20473545	20473545	0	3	20,331,25,	0,124462,238097,
LjG1.1_chr1	20235423	20473545	NOV.1415.1	0	+	20473545	20473545	0	3	20,331,25,	0,124462,238097,
LjG1.1_chr1	20235423	20473545	NOV.1415.1	0	+	20473545	20473545	0	3	20,331,25,	0,124462,238097,
LjG1.1_chr1	20235423	20473545	NOV.1415.1	0	+	20473545	20473545	0	3	20,331,25,	0,124462,238097,
LjG1.1_chr1	20235423	20473545	NOV.1415.1	0	+	20473545	20473545	0	3	20,331,25,	0,124462,238097,
LjG1.1_chr1	20235423	20473545	NOV.1415.1	0	+	20473545	20473545	0	3	20,331,25,	0,124462,238097,
LjG1.1_chr1	20425405	20473553	NOV.1415.26	0	+	20473553	20473553	0	3	102,959,35,	0,2207,48113,
LjG1.1_chr3	20203013	20203801	NOV.14153.1	0	-	20203801	20203801	0	1	788,	0,
LjG1.1_chr3	20203295	20203724	NOV.14153.2	0	-	20203724	20203724	0	2	293,16,	0,413,
LjG1.1_chr3	20208407	20238107	NOV.14155.1	0	-	20238107	20238107	0	2	10,524,	0,29176,
LjG1.1_chr3	20208407	20238107	NOV.14155.1	0	-	20238107	20238107	0	2	10,524,	0,29176,
LjG1.1_chr3	20208407	20238107	NOV.14155.1	0	-	20238107	20238107	0	2	10,524,	0,29176,
LjG1.1_chr3	20342012	20342477	NOV.14165.1	0	+	20342477	20342477	0	1	465,	0,
LjG1.1_chr3	20366142	20450765	NOV.14168.1	0	-	20450765	20450765	0	2	18,746,	0,83877,
LjG1.1_chr3	20366142	20450765	NOV.14168.1	0	-	20450765	20450765	0	2	18,746,	0,83877,
LjG1.1_chr1	20473085	20557930	NOV.1417.6	0	-	20557930	20557930	0	6	382,364,177,114,79,166,	0,81294,81881,83064,83417,84679,
LjG1.1_chr1	20473085	20557930	NOV.1417.6	0	-	20557930	20557930	0	6	382,364,177,114,79,166,	0,81294,81881,83064,83417,84679,
LjG1.1_chr1	20473085	20557930	NOV.1417.6	0	-	20557930	20557930	0	6	382,364,177,114,79,166,	0,81294,81881,83064,83417,84679,
LjG1.1_chr1	20473085	20557930	NOV.1417.6	0	-	20557930	20557930	0	6	382,364,177,114,79,166,	0,81294,81881,83064,83417,84679,
LjG1.1_chr1	20473085	20557930	NOV.1417.6	0	-	20557930	20557930	0	6	382,364,177,114,79,166,	0,81294,81881,83064,83417,84679,
LjG1.1_chr3	20567609	20615324	NOV.14178.8	0	+	20615324	20615324	0	3	82,487,17,	0,140,47698,
LjG1.1_chr3	20628834	20629385	NOV.14181.1	0	+	20629385	20629385	0	1	551,	0,
LjG1.1_chr3	20630368	20630715	NOV.14183.1	0	-	20630715	20630715	0	1	347,	0,
LjG1.1_chr3	20781328	20862477	NOV.14191.1	0	-	20862477	20862477	0	2	14,602,	0,80547,
LjG1.1_chr3	20781328	20862477	NOV.14191.1	0	-	20862477	20862477	0	2	14,602,	0,80547,
LjG1.1_chr3	20863412	20864233	NOV.14199.1	0	-	20864233	20864233	0	1	821,	0,
LjG1.1_chr3	21296168	21296405	NOV.14222.1	0	+	21296405	21296405	0	1	237,	0,
LjG1.1_chr3	21959493	21960268	NOV.14259.1	0	-	21960268	21960268	0	1	775,	0,
LjG1.1_chr3	22414236	22524556	NOV.14295.1	0	-	22524556	22524556	0	3	20,2754,1141,	0,105070,109179,
LjG1.1_chr3	22414236	22524556	NOV.14295.1	0	-	22524556	22524556	0	3	20,2754,1141,	0,105070,109179,
LjG1.1_chr3	22414236	22524556	NOV.14295.1	0	-	22524556	22524556	0	3	20,2754,1141,	0,105070,109179,
LjG1.1_chr3	22414236	22524556	NOV.14295.1	0	-	22524556	22524556	0	3	20,2754,1141,	0,105070,109179,
LjG1.1_chr3	22414236	22524556	NOV.14295.1	0	-	22524556	22524556	0	3	20,2754,1141,	0,105070,109179,
LjG1.1_chr3	22519960	22524089	NOV.14295.10	0	-	22524089	22524089	0	2	1729,426,	0,3703,
LjG1.1_chr3	22519960	22524089	NOV.14295.10	0	-	22524089	22524089	0	2	1729,426,	0,3703,
LjG1.1_chr3	22519976	22524059	NOV.14295.11	0	-	22524059	22524059	0	2	463,395,	0,3688,
LjG1.1_chr3	22519976	22524059	NOV.14295.11	0	-	22524059	22524059	0	2	463,395,	0,3688,
LjG1.1_chr3	22519976	22524059	NOV.14295.11	0	-	22524059	22524059	0	2	463,395,	0,3688,
LjG1.1_chr3	22519976	22524059	NOV.14295.11	0	-	22524059	22524059	0	2	463,395,	0,3688,
LjG1.1_chr3	22519976	22524059	NOV.14295.11	0	-	22524059	22524059	0	2	463,395,	0,3688,
LjG1.1_chr3	22519981	22522065	NOV.14295.12	0	-	22522065	22522065	0	2	688,1223,	0,861,
LjG1.1_chr3	22414237	22524434	NOV.14295.2	0	-	22524434	22524434	0	4	24,1300,1270,1019,	0,105068,106553,109178,
LjG1.1_chr3	22414237	22524434	NOV.14295.2	0	-	22524434	22524434	0	4	24,1300,1270,1019,	0,105068,106553,109178,
LjG1.1_chr3	22414237	22524434	NOV.14295.2	0	-	22524434	22524434	0	4	24,1300,1270,1019,	0,105068,106553,109178,
LjG1.1_chr3	22414237	22524434	NOV.14295.2	0	-	22524434	22524434	0	4	24,1300,1270,1019,	0,105068,106553,109178,
LjG1.1_chr3	22414237	22524434	NOV.14295.2	0	-	22524434	22524434	0	4	24,1300,1270,1019,	0,105068,106553,109178,
LjG1.1_chr3	22414238	22524098	NOV.14295.3	0	-	22524098	22524098	0	4	21,251,1781,683,	0,105065,106041,109177,
LjG1.1_chr3	22414238	22524098	NOV.14295.3	0	-	22524098	22524098	0	4	21,251,1781,683,	0,105065,106041,109177,
LjG1.1_chr3	22414238	22524098	NOV.14295.3	0	-	22524098	22524098	0	4	21,251,1781,683,	0,105065,106041,109177,
LjG1.1_chr3	22414238	22524098	NOV.14295.3	0	-	22524098	22524098	0	4	21,251,1781,683,	0,105065,106041,109177,
LjG1.1_chr3	22414238	22524098	NOV.14295.3	0	-	22524098	22524098	0	4	21,251,1781,683,	0,105065,106041,109177,
LjG1.1_chr3	22414238	22524063	NOV.14295.4	0	-	22524063	22524063	0	4	20,85,1329,648,	0,106307,106493,109177,
LjG1.1_chr3	22414238	22524063	NOV.14295.4	0	-	22524063	22524063	0	4	20,85,1329,648,	0,106307,106493,109177,
LjG1.1_chr3	22414238	22527691	NOV.14295.5	0	-	22527691	22527691	0	2	23,886,	0,112567,
LjG1.1_chr3	22414238	22527691	NOV.14295.5	0	-	22527691	22527691	0	2	23,886,	0,112567,
LjG1.1_chr3	22414238	22527691	NOV.14295.5	0	-	22527691	22527691	0	2	23,886,	0,112567,
LjG1.1_chr3	22414238	22527691	NOV.14295.5	0	-	22527691	22527691	0	2	23,886,	0,112567,
LjG1.1_chr3	22414238	22527691	NOV.14295.5	0	-	22527691	22527691	0	2	23,886,	0,112567,
LjG1.1_chr3	22414238	22527691	NOV.14295.5	0	-	22527691	22527691	0	2	23,886,	0,112567,
LjG1.1_chr3	22436758	22526679	NOV.14295.6	0	-	22526679	22526679	0	4	19,589,1721,102,	0,84358,86674,89819,
LjG1.1_chr3	22436758	22526679	NOV.14295.6	0	-	22526679	22526679	0	4	19,589,1721,102,	0,84358,86674,89819,
LjG1.1_chr3	22436758	22526679	NOV.14295.6	0	-	22526679	22526679	0	4	19,589,1721,102,	0,84358,86674,89819,
LjG1.1_chr3	22436758	22526679	NOV.14295.6	0	-	22526679	22526679	0	4	19,589,1721,102,	0,84358,86674,89819,
LjG1.1_chr3	22436758	22526679	NOV.14295.6	0	-	22526679	22526679	0	4	19,589,1721,102,	0,84358,86674,89819,
LjG1.1_chr3	22519802	22524106	NOV.14295.7	0	-	22524106	22524106	0	2	1909,344,	0,3960,
LjG1.1_chr3	22519933	22524231	NOV.14295.8	0	-	22524231	22524231	0	2	2133,811,	0,3487,
LjG1.1_chr3	22519933	22524231	NOV.14295.8	0	-	22524231	22524231	0	2	2133,811,	0,3487,
LjG1.1_chr3	22519933	22524231	NOV.14295.8	0	-	22524231	22524231	0	2	2133,811,	0,3487,
LjG1.1_chr3	22519933	22524231	NOV.14295.8	0	-	22524231	22524231	0	2	2133,811,	0,3487,
LjG1.1_chr3	22519933	22524231	NOV.14295.8	0	-	22524231	22524231	0	2	2133,811,	0,3487,
LjG1.1_chr3	22519933	22524231	NOV.14295.9	0	-	22524231	22524231	0	3	713,1335,811,	0,798,3487,
LjG1.1_chr3	22519933	22524231	NOV.14295.9	0	-	22524231	22524231	0	3	713,1335,811,	0,798,3487,
LjG1.1_chr3	22519933	22524231	NOV.14295.9	0	-	22524231	22524231	0	3	713,1335,811,	0,798,3487,
LjG1.1_chr3	22519933	22524231	NOV.14295.9	0	-	22524231	22524231	0	3	713,1335,811,	0,798,3487,
LjG1.1_chr3	22519933	22524231	NOV.14295.9	0	-	22524231	22524231	0	3	713,1335,811,	0,798,3487,
LjG1.1_chr3	22667434	22667956	NOV.14307.1	0	+	22667956	22667956	0	1	522,	0,
LjG1.1_chr3	22709034	22710443	NOV.14309.1	0	+	22710443	22710443	0	2	18,691,	0,718,
LjG1.1_chr3	22898399	22898834	NOV.14321.1	0	-	22898834	22898834	0	1	435,	0,
LjG1.1_chr3	23019318	23117896	NOV.14334.1	0	+	23117896	23117896	0	2	15,516,	0,98062,
LjG1.1_chr3	23019318	23117896	NOV.14334.1	0	+	23117896	23117896	0	2	15,516,	0,98062,
LjG1.1_chr1	20774631	20822399	NOV.1438.4	0	+	20822399	20822399	0	5	23,117,82,316,16,	0,1263,1556,1835,47752,
LjG1.1_chr1	20774631	20822399	NOV.1438.4	0	+	20822399	20822399	0	5	23,117,82,316,16,	0,1263,1556,1835,47752,
LjG1.1_chr1	20774631	20822399	NOV.1438.4	0	+	20822399	20822399	0	5	23,117,82,316,16,	0,1263,1556,1835,47752,
LjG1.1_chr1	20774631	20822399	NOV.1438.4	0	+	20822399	20822399	0	5	23,117,82,316,16,	0,1263,1556,1835,47752,
LjG1.1_chr1	20774631	20822399	NOV.1438.4	0	+	20822399	20822399	0	5	23,117,82,316,16,	0,1263,1556,1835,47752,
LjG1.1_chr1	20775529	20776004	NOV.1439.1	0	-	20776004	20776004	0	1	475,	0,
LjG1.1_chr1	20775529	20776004	NOV.1439.1	0	-	20776004	20776004	0	1	475,	0,
LjG1.1_chr1	20775529	20776004	NOV.1439.1	0	-	20776004	20776004	0	1	475,	0,
LjG1.1_chr1	20775529	20776004	NOV.1439.1	0	-	20776004	20776004	0	1	475,	0,
LjG1.1_chr3	24371014	24371287	NOV.14408.1	0	+	24371287	24371287	0	1	273,	0,
LjG1.1_chr3	24417266	24418688	NOV.14411.1	0	+	24418688	24418688	0	2	100,603,	0,819,
LjG1.1_chr3	24571660	24572869	NOV.14422.1	0	-	24572869	24572869	0	1	1209,	0,
LjG1.1_chr3	24658945	24659750	NOV.14430.1	0	-	24659750	24659750	0	2	621,100,	0,705,
LjG1.1_chr3	25087138	25087962	NOV.14457.1	0	-	25087962	25087962	0	1	824,	0,
LjG1.1_chr3	25221822	25222369	NOV.14463.1	0	+	25222369	25222369	0	1	547,	0,
LjG1.1_chr3	25267777	25268113	NOV.14468.1	0	+	25268113	25268113	0	1	336,	0,
LjG1.1_chr3	25270521	25271109	NOV.14470.1	0	+	25271109	25271109	0	1	588,	0,
LjG1.1_chr3	25344690	25344911	NOV.14472.1	0	+	25344911	25344911	0	1	221,	0,
LjG1.1_chr3	25790851	25791186	NOV.14493.1	0	-	25791186	25791186	0	1	335,	0,
LjG1.1_chr3	25791958	25793449	NOV.14494.1	0	-	25793449	25793449	0	1	1491,	0,
LjG1.1_chr3	25936804	25937222	NOV.14504.1	0	+	25937222	25937222	0	1	418,	0,
LjG1.1_chr3	26839659	27030851	NOV.14530.1	0	+	27030851	27030851	0	2	730,20,	0,191172,
LjG1.1_chr3	26839659	27030851	NOV.14530.1	0	+	27030851	27030851	0	2	730,20,	0,191172,
LjG1.1_chr3	26839659	27030851	NOV.14530.1	0	+	27030851	27030851	0	2	730,20,	0,191172,
LjG1.1_chr3	27367659	27368100	NOV.14550.1	0	+	27368100	27368100	0	1	441,	0,
LjG1.1_chr3	27537833	27613179	NOV.14553.10	0	+	27613179	27613179	0	4	309,60,76,104,	0,400,2557,75242,
LjG1.1_chr3	27540389	27681449	NOV.14553.11	0	+	27681449	27681449	0	3	73,261,43,	0,168,141017,
LjG1.1_chr3	27537767	27681450	NOV.14553.8	0	+	27681450	27681450	0	5	375,60,72,325,42,	0,466,2623,2790,143641,
LjG1.1_chr3	27537791	27681449	NOV.14553.9	0	+	27681449	27681449	0	5	351,60,72,249,41,	0,442,2599,2766,143617,
LjG1.1_chr3	27795608	27796349	NOV.14572.1	0	+	27796349	27796349	0	1	741,	0,
LjG1.1_chr3	27795689	27796464	NOV.14572.2	0	+	27796464	27796464	0	2	344,355,	0,420,
LjG1.1_chr3	27796894	27797489	NOV.14573.1	0	+	27797489	27797489	0	1	595,	0,
LjG1.1_chr3	27804685	27805367	NOV.14575.1	0	-	27805367	27805367	0	1	682,	0,
LjG1.1_chr3	27833405	27834210	NOV.14581.1	0	-	27834210	27834210	0	1	805,	0,
LjG1.1_chr3	27850095	27851690	NOV.14583.1	0	-	27851690	27851690	0	2	382,82,	0,1513,
LjG1.1_chr3	27850104	27896040	NOV.14583.3	0	-	27896040	27896040	0	3	408,134,12,	0,1282,45924,
LjG1.1_chr3	28219503	28219727	NOV.14596.1	0	+	28219727	28219727	0	1	224,	0,
LjG1.1_chr3	28219503	28219727	NOV.14596.1	0	+	28219727	28219727	0	1	224,	0,
LjG1.1_chr3	28333431	28333702	NOV.14603.1	0	-	28333702	28333702	0	1	271,	0,
LjG1.1_chr3	28980521	29064526	NOV.14612.14	0	+	29064526	29064526	0	4	29,72,394,26,	0,435,702,83979,
LjG1.1_chr3	28980521	29064526	NOV.14612.14	0	+	29064526	29064526	0	4	29,72,394,26,	0,435,702,83979,
LjG1.1_chr3	28980521	29064526	NOV.14612.14	0	+	29064526	29064526	0	4	29,72,394,26,	0,435,702,83979,
LjG1.1_chr3	28980521	29064526	NOV.14612.14	0	+	29064526	29064526	0	4	29,72,394,26,	0,435,702,83979,
LjG1.1_chr3	29080312	29304266	NOV.14612.22	0	+	29304266	29304266	0	4	162,152,233,40,	0,272,783,223914,
LjG1.1_chr3	29080312	29304266	NOV.14612.22	0	+	29304266	29304266	0	4	162,152,233,40,	0,272,783,223914,
LjG1.1_chr3	29080312	29304266	NOV.14612.22	0	+	29304266	29304266	0	4	162,152,233,40,	0,272,783,223914,
LjG1.1_chr3	29080312	29304266	NOV.14612.22	0	+	29304266	29304266	0	4	162,152,233,40,	0,272,783,223914,
LjG1.1_chr3	29080312	29304266	NOV.14612.22	0	+	29304266	29304266	0	4	162,152,233,40,	0,272,783,223914,
LjG1.1_chr3	29080312	29304266	NOV.14612.22	0	+	29304266	29304266	0	4	162,152,233,40,	0,272,783,223914,
LjG1.1_chr3	28814431	29304266	NOV.14612.7	0	+	29304266	29304266	0	2	356,41,	0,489794,
LjG1.1_chr3	28814431	29304266	NOV.14612.7	0	+	29304266	29304266	0	2	356,41,	0,489794,
LjG1.1_chr3	28814431	29304266	NOV.14612.7	0	+	29304266	29304266	0	2	356,41,	0,489794,
LjG1.1_chr3	28814431	29304266	NOV.14612.7	0	+	29304266	29304266	0	2	356,41,	0,489794,
LjG1.1_chr3	28814431	29304266	NOV.14612.7	0	+	29304266	29304266	0	2	356,41,	0,489794,
LjG1.1_chr3	28814431	29304266	NOV.14612.7	0	+	29304266	29304266	0	2	356,41,	0,489794,
LjG1.1_chr3	28814431	29304266	NOV.14612.7	0	+	29304266	29304266	0	2	356,41,	0,489794,
LjG1.1_chr3	28814431	29304266	NOV.14612.7	0	+	29304266	29304266	0	2	356,41,	0,489794,
LjG1.1_chr3	28814431	29304266	NOV.14612.7	0	+	29304266	29304266	0	2	356,41,	0,489794,
LjG1.1_chr3	28814431	29304266	NOV.14612.7	0	+	29304266	29304266	0	2	356,41,	0,489794,
LjG1.1_chr3	28814431	29304266	NOV.14612.7	0	+	29304266	29304266	0	2	356,41,	0,489794,
LjG1.1_chr3	28814431	29304266	NOV.14612.7	0	+	29304266	29304266	0	2	356,41,	0,489794,
LjG1.1_chr3	28814431	29304266	NOV.14612.7	0	+	29304266	29304266	0	2	356,41,	0,489794,
LjG1.1_chr3	28814431	29304266	NOV.14612.7	0	+	29304266	29304266	0	2	356,41,	0,489794,
LjG1.1_chr3	28814431	29304266	NOV.14612.7	0	+	29304266	29304266	0	2	356,41,	0,489794,
LjG1.1_chr3	28814431	29304266	NOV.14612.7	0	+	29304266	29304266	0	2	356,41,	0,489794,
LjG1.1_chr3	28954614	28954961	NOV.14625.1	0	+	28954961	28954961	0	2	221,34,	0,313,
LjG1.1_chr3	29139800	29140552	NOV.14647.3	0	-	29140552	29140552	0	2	257,185,	0,567,
LjG1.1_chr3	29264173	29264480	NOV.14654.1	0	-	29264480	29264480	0	1	307,	0,
LjG1.1_chr3	29378767	29414192	NOV.14663.1	0	+	29414192	29414192	0	4	10,220,136,657,	0,33384,33716,34768,
LjG1.1_chr3	29598960	29683450	NOV.14674.1	0	+	29683450	29683450	0	4	12,81,171,358,	0,82524,82696,84132,
LjG1.1_chr3	29598960	29683450	NOV.14674.1	0	+	29683450	29683450	0	4	12,81,171,358,	0,82524,82696,84132,
LjG1.1_chr3	29598960	29683450	NOV.14674.1	0	+	29683450	29683450	0	4	12,81,171,358,	0,82524,82696,84132,
LjG1.1_chr3	30238193	30238545	NOV.14707.1	0	-	30238545	30238545	0	1	352,	0,
LjG1.1_chr1	21398235	21398507	NOV.1473.1	0	-	21398507	21398507	0	1	272,	0,
LjG1.1_chr3	31284968	31285869	NOV.14739.1	0	-	31285869	31285869	0	1	901,	0,
LjG1.1_chr3	31310354	31312620	NOV.14741.1	0	+	31312620	31312620	0	3	594,154,104,	0,1929,2162,
LjG1.1_chr3	31601757	31602209	NOV.14750.1	0	+	31602209	31602209	0	1	452,	0,
LjG1.1_chr3	32349117	32355523	NOV.14787.1	0	+	32355523	32355523	0	2	349,13,	0,6393,
LjG1.1_chr3	32684753	32685453	NOV.14801.1	0	-	32685453	32685453	0	1	700,	0,
LjG1.1_chr3	32684753	32685453	NOV.14801.1	0	-	32685453	32685453	0	1	700,	0,
LjG1.1_chr3	32684753	32685453	NOV.14801.1	0	-	32685453	32685453	0	1	700,	0,
LjG1.1_chr3	32960131	32960583	NOV.14821.1	0	-	32960583	32960583	0	2	168,58,	0,394,
LjG1.1_chr3	33127381	33127621	NOV.14831.1	0	+	33127621	33127621	0	1	240,	0,
LjG1.1_chr3	33179937	33183570	NOV.14837.1	0	+	33183570	33183570	0	2	53,256,	0,3377,
LjG1.1_chr3	33179937	33183570	NOV.14837.1	0	+	33183570	33183570	0	2	53,256,	0,3377,
LjG1.1_chr1	21503657	21503960	NOV.1484.1	0	+	21503960	21503960	0	1	303,	0,
LjG1.1_chr3	33217303	33219516	NOV.14841.1	0	+	33219516	33219516	0	1	2213,	0,
LjG1.1_chr3	33568292	33569017	NOV.14859.1	0	-	33569017	33569017	0	2	332,189,	0,536,
LjG1.1_chr3	34507911	34691255	NOV.14878.5	0	+	34691255	34691255	0	2	476,20,	0,183324,
LjG1.1_chr3	34507911	34691255	NOV.14878.5	0	+	34691255	34691255	0	2	476,20,	0,183324,
LjG1.1_chr3	34507264	34508376	NOV.14881.1	0	-	34508376	34508376	0	2	103,462,	0,650,
LjG1.1_chr3	34516107	34517023	NOV.14882.1	0	-	34517023	34517023	0	2	147,511,	0,405,
LjG1.1_chr3	34795902	34994417	NOV.14897.3	0	-	34994417	34994417	0	5	37,317,66,330,95,	0,197078,197529,198001,198420,
LjG1.1_chr3	34795902	34994417	NOV.14897.3	0	-	34994417	34994417	0	5	37,317,66,330,95,	0,197078,197529,198001,198420,
LjG1.1_chr3	34795902	34994417	NOV.14897.3	0	-	34994417	34994417	0	5	37,317,66,330,95,	0,197078,197529,198001,198420,
LjG1.1_chr3	34795903	34955071	NOV.14897.4	0	-	34955071	34955071	0	3	43,411,126,	0,158490,159042,
LjG1.1_chr3	34795903	34955071	NOV.14897.4	0	-	34955071	34955071	0	3	43,411,126,	0,158490,159042,
LjG1.1_chr3	34795906	34955071	NOV.14897.5	0	-	34955071	34955071	0	3	36,366,126,	0,158532,159039,
LjG1.1_chr3	34795906	34955071	NOV.14897.5	0	-	34955071	34955071	0	3	36,366,126,	0,158532,159039,
LjG1.1_chr3	34795908	34994226	NOV.14897.8	0	-	34994226	34994226	0	4	31,313,66,323,	0,197076,197523,197995,
LjG1.1_chr3	34795908	34994226	NOV.14897.8	0	-	34994226	34994226	0	4	31,313,66,323,	0,197076,197523,197995,
LjG1.1_chr3	34795908	34994226	NOV.14897.8	0	-	34994226	34994226	0	4	31,313,66,323,	0,197076,197523,197995,
LjG1.1_chr3	34848821	34850217	NOV.14900.1	0	-	34850217	34850217	0	2	493,633,	0,763,
LjG1.1_chr3	35524239	35784777	NOV.14922.1	0	-	35784777	35784777	0	3	17,29,810,	0,1192,259728,
LjG1.1_chr3	35524239	35784777	NOV.14922.1	0	-	35784777	35784777	0	3	17,29,810,	0,1192,259728,
LjG1.1_chr3	35524239	35784777	NOV.14922.1	0	-	35784777	35784777	0	3	17,29,810,	0,1192,259728,
LjG1.1_chr3	35524239	35784777	NOV.14922.1	0	-	35784777	35784777	0	3	17,29,810,	0,1192,259728,
LjG1.1_chr3	35525418	35784776	NOV.14922.2	0	-	35784776	35784776	0	2	40,728,	0,258630,
LjG1.1_chr3	35525418	35784776	NOV.14922.2	0	-	35784776	35784776	0	2	40,728,	0,258630,
LjG1.1_chr3	35525418	35784776	NOV.14922.2	0	-	35784776	35784776	0	2	40,728,	0,258630,
LjG1.1_chr3	35525418	35784776	NOV.14922.2	0	-	35784776	35784776	0	2	40,728,	0,258630,
LjG1.1_chr3	35618631	35618839	NOV.14927.1	0	+	35618839	35618839	0	1	208,	0,
LjG1.1_chr3	35618631	35618839	NOV.14927.1	0	+	35618839	35618839	0	1	208,	0,
LjG1.1_chr1	21673819	21674047	NOV.1493.1	0	+	21674047	21674047	0	1	228,	0,
LjG1.1_chr3	35873496	35873898	NOV.14936.2	0	+	35873898	35873898	0	2	54,232,	0,170,
LjG1.1_chr1	21694302	21694511	NOV.1495.1	0	+	21694511	21694511	0	1	209,	0,
LjG1.1_chr1	21694302	21694511	NOV.1495.1	0	+	21694511	21694511	0	1	209,	0,
LjG1.1_chr1	21694302	21694511	NOV.1495.1	0	+	21694511	21694511	0	1	209,	0,
LjG1.1_chr1	21694302	21694511	NOV.1495.1	0	+	21694511	21694511	0	1	209,	0,
LjG1.1_chr1	21700053	21700277	NOV.1496.1	0	+	21700277	21700277	0	1	224,	0,
LjG1.1_chr1	21700053	21700277	NOV.1496.1	0	+	21700277	21700277	0	1	224,	0,
LjG1.1_chr1	21700053	21700277	NOV.1496.1	0	+	21700277	21700277	0	1	224,	0,
LjG1.1_chr1	21700053	21700277	NOV.1496.1	0	+	21700277	21700277	0	1	224,	0,
LjG1.1_chr1	21700053	21700277	NOV.1496.1	0	+	21700277	21700277	0	1	224,	0,
LjG1.1_chr1	21700053	21700277	NOV.1496.1	0	+	21700277	21700277	0	1	224,	0,
LjG1.1_chr3	36710089	36714189	NOV.14968.1	0	+	36714189	36714189	0	3	128,185,493,	0,320,3607,
LjG1.1_chr3	36710089	36714189	NOV.14968.2	0	+	36714189	36714189	0	3	128,187,495,	0,317,3605,
LjG1.1_chr3	36710122	36714074	NOV.14968.3	0	+	36714074	36714074	0	3	95,188,378,	0,284,3574,
LjG1.1_chr3	37512771	37513135	NOV.15008.1	0	+	37513135	37513135	0	1	364,	0,
LjG1.1_chr3	37914422	38515090	NOV.15011.1	0	+	38515090	38515090	0	3	169,496,44,	0,1446,600624,
LjG1.1_chr3	37914422	38515090	NOV.15011.1	0	+	38515090	38515090	0	3	169,496,44,	0,1446,600624,
LjG1.1_chr3	37914422	38515090	NOV.15011.1	0	+	38515090	38515090	0	3	169,496,44,	0,1446,600624,
LjG1.1_chr3	37914422	38515090	NOV.15011.1	0	+	38515090	38515090	0	3	169,496,44,	0,1446,600624,
LjG1.1_chr3	37914422	38515090	NOV.15011.1	0	+	38515090	38515090	0	3	169,496,44,	0,1446,600624,
LjG1.1_chr3	37914422	38515090	NOV.15011.1	0	+	38515090	38515090	0	3	169,496,44,	0,1446,600624,
LjG1.1_chr3	37914422	38515090	NOV.15011.1	0	+	38515090	38515090	0	3	169,496,44,	0,1446,600624,
LjG1.1_chr3	37914422	38515090	NOV.15011.1	0	+	38515090	38515090	0	3	169,496,44,	0,1446,600624,
LjG1.1_chr3	37914422	38515090	NOV.15011.1	0	+	38515090	38515090	0	3	169,496,44,	0,1446,600624,
LjG1.1_chr3	37914422	38515090	NOV.15011.1	0	+	38515090	38515090	0	3	169,496,44,	0,1446,600624,
LjG1.1_chr3	37914422	38515090	NOV.15011.1	0	+	38515090	38515090	0	3	169,496,44,	0,1446,600624,
LjG1.1_chr3	37914422	38515090	NOV.15011.1	0	+	38515090	38515090	0	3	169,496,44,	0,1446,600624,
LjG1.1_chr3	37914422	38515090	NOV.15011.1	0	+	38515090	38515090	0	3	169,496,44,	0,1446,600624,
LjG1.1_chr3	37914422	38515090	NOV.15011.1	0	+	38515090	38515090	0	3	169,496,44,	0,1446,600624,
LjG1.1_chr3	37914422	38515090	NOV.15011.1	0	+	38515090	38515090	0	3	169,496,44,	0,1446,600624,
LjG1.1_chr3	37914422	38515090	NOV.15011.1	0	+	38515090	38515090	0	3	169,496,44,	0,1446,600624,
LjG1.1_chr3	37914423	38056236	NOV.15011.2	0	+	38056236	38056236	0	3	168,494,20,	0,1445,141793,
LjG1.1_chr3	37914423	38056236	NOV.15011.2	0	+	38056236	38056236	0	3	168,494,20,	0,1445,141793,
LjG1.1_chr3	37914423	38056236	NOV.15011.2	0	+	38056236	38056236	0	3	168,494,20,	0,1445,141793,
LjG1.1_chr3	37961125	37962251	NOV.15017.1	0	-	37962251	37962251	0	2	13,191,	0,935,
LjG1.1_chr3	38530054	38530304	NOV.15042.1	0	-	38530304	38530304	0	1	250,	0,
LjG1.1_chr3	38972842	38974138	NOV.15058.1	0	-	38974138	38974138	0	1	1296,	0,
LjG1.1_chr3	39217440	39218381	NOV.15063.1	0	-	39218381	39218381	0	1	941,	0,
LjG1.1_chr3	39226330	39517606	NOV.15064.3	0	+	39517606	39517606	0	5	97,438,100,312,20,	0,205,797,1073,291256,
LjG1.1_chr3	39226330	39517606	NOV.15064.3	0	+	39517606	39517606	0	5	97,438,100,312,20,	0,205,797,1073,291256,
LjG1.1_chr3	39226330	39517606	NOV.15064.3	0	+	39517606	39517606	0	5	97,438,100,312,20,	0,205,797,1073,291256,
LjG1.1_chr3	39226330	39517606	NOV.15064.3	0	+	39517606	39517606	0	5	97,438,100,312,20,	0,205,797,1073,291256,
LjG1.1_chr3	39226330	39517606	NOV.15064.3	0	+	39517606	39517606	0	5	97,438,100,312,20,	0,205,797,1073,291256,
LjG1.1_chr3	39226330	39517606	NOV.15064.3	0	+	39517606	39517606	0	5	97,438,100,312,20,	0,205,797,1073,291256,
LjG1.1_chr3	39230614	39230976	NOV.15065.1	0	-	39230976	39230976	0	1	362,	0,
LjG1.1_chr3	40133853	40134478	NOV.15101.1	0	-	40134478	40134478	0	1	625,	0,
LjG1.1_chr3	40679049	40699003	NOV.15115.2	0	+	40699003	40699003	0	3	110,439,17,	0,464,19937,
LjG1.1_chr3	40679049	40699003	NOV.15115.2	0	+	40699003	40699003	0	3	110,439,17,	0,464,19937,
LjG1.1_chr3	41221905	41222536	NOV.15133.1	0	+	41222536	41222536	0	1	631,	0,
LjG1.1_chr3	41857527	41857953	NOV.15161.1	0	+	41857953	41857953	0	1	426,	0,
LjG1.1_chr3	42078301	42080222	NOV.15170.1	0	+	42080222	42080222	0	2	32,433,	0,1488,
LjG1.1_chr3	42137082	42137307	NOV.15174.1	0	+	42137307	42137307	0	1	225,	0,
LjG1.1_chr3	42722218	42722424	NOV.15195.1	0	-	42722424	42722424	0	1	206,	0,
LjG1.1_chr3	42746959	42747187	NOV.15197.1	0	+	42747187	42747187	0	1	228,	0,
LjG1.1_chr3	42746959	42747187	NOV.15197.1	0	+	42747187	42747187	0	1	228,	0,
LjG1.1_chr3	42999019	42999596	NOV.15201.1	0	-	42999596	42999596	0	1	577,	0,
LjG1.1_chr3	43114159	43164806	NOV.15208.1	0	-	43164806	43164806	0	2	13,200,	0,50447,
LjG1.1_chr3	44668587	44668794	NOV.15235.1	0	+	44668794	44668794	0	1	207,	0,
LjG1.1_chr3	47551254	47552089	NOV.15252.1	0	-	47552089	47552089	0	1	835,	0,
LjG1.1_chr1	22492859	22493086	NOV.1529.1	0	-	22493086	22493086	0	1	227,	0,
LjG1.1_chr3	49812908	49813600	NOV.15292.1	0	-	49813600	49813600	0	1	692,	0,
LjG1.1_chr3	51598760	51720080	NOV.15305.4	0	+	51720080	51720080	0	4	587,140,28,103,	0,861,87881,121217,
LjG1.1_chr3	51598760	51720080	NOV.15305.4	0	+	51720080	51720080	0	4	587,140,28,103,	0,861,87881,121217,
LjG1.1_chr3	52845734	52846306	NOV.15330.1	0	-	52846306	52846306	0	1	572,	0,
LjG1.1_chr3	54923466	54923830	NOV.15362.1	0	-	54923830	54923830	0	1	364,	0,
LjG1.1_chr3	55845605	56260409	NOV.15381.1	0	-	56260409	56260409	0	3	51,410,130,	0,402747,414674,
LjG1.1_chr3	55845605	56260409	NOV.15381.1	0	-	56260409	56260409	0	3	51,410,130,	0,402747,414674,
LjG1.1_chr3	55845605	56260409	NOV.15381.1	0	-	56260409	56260409	0	3	51,410,130,	0,402747,414674,
LjG1.1_chr3	55845605	56260409	NOV.15381.1	0	-	56260409	56260409	0	3	51,410,130,	0,402747,414674,
LjG1.1_chr3	55845605	56260409	NOV.15381.1	0	-	56260409	56260409	0	3	51,410,130,	0,402747,414674,
LjG1.1_chr3	55845619	56260585	NOV.15381.3	0	-	56260585	56260585	0	4	35,425,164,114,	0,414132,414660,414852,
LjG1.1_chr3	55845619	56260585	NOV.15381.3	0	-	56260585	56260585	0	4	35,425,164,114,	0,414132,414660,414852,
LjG1.1_chr3	55845619	56260585	NOV.15381.3	0	-	56260585	56260585	0	4	35,425,164,114,	0,414132,414660,414852,
LjG1.1_chr3	55845619	56260585	NOV.15381.3	0	-	56260585	56260585	0	4	35,425,164,114,	0,414132,414660,414852,
LjG1.1_chr3	55845619	56260585	NOV.15381.3	0	-	56260585	56260585	0	4	35,425,164,114,	0,414132,414660,414852,
LjG1.1_chr3	56027359	56027707	NOV.15389.1	0	+	56027707	56027707	0	1	348,	0,
LjG1.1_chr3	56856016	56856322	NOV.15417.1	0	+	56856322	56856322	0	1	306,	0,
LjG1.1_chr3	57046091	57046327	NOV.15425.1	0	+	57046327	57046327	0	1	236,	0,
LjG1.1_chr3	57395150	57611146	NOV.15435.4	0	-	57611146	57611146	0	3	20,771,202,	0,214574,215794,
LjG1.1_chr3	57395150	57611146	NOV.15435.4	0	-	57611146	57611146	0	3	20,771,202,	0,214574,215794,
LjG1.1_chr3	57395150	57610767	NOV.15435.5	0	-	57610767	57610767	0	3	20,500,30,	0,214574,215587,
LjG1.1_chr3	57395150	57610767	NOV.15435.5	0	-	57610767	57610767	0	3	20,500,30,	0,214574,215587,
LjG1.1_chr3	57406998	57409325	NOV.15437.1	0	-	57409325	57409325	0	3	450,82,103,	0,865,2224,
LjG1.1_chr3	57407001	57409656	NOV.15437.2	0	-	57409656	57409656	0	3	447,101,158,	0,2221,2497,
LjG1.1_chr3	57450581	57451028	NOV.15439.1	0	+	57451028	57451028	0	1	447,	0,
LjG1.1_chr3	58145141	58346020	NOV.15452.10	0	+	58346020	58346020	0	3	72,338,24,	0,715,200855,
LjG1.1_chr3	58145141	58346020	NOV.15452.10	0	+	58346020	58346020	0	3	72,338,24,	0,715,200855,
LjG1.1_chr3	58145141	58346020	NOV.15452.10	0	+	58346020	58346020	0	3	72,338,24,	0,715,200855,
LjG1.1_chr3	58145141	58346020	NOV.15452.10	0	+	58346020	58346020	0	3	72,338,24,	0,715,200855,
LjG1.1_chr3	58144351	58235889	NOV.15452.6	0	+	58235889	58235889	0	6	139,53,39,70,348,14,	0,228,640,792,1505,91524,
LjG1.1_chr3	58144351	58235889	NOV.15452.6	0	+	58235889	58235889	0	6	139,53,39,70,348,14,	0,228,640,792,1505,91524,
LjG1.1_chr3	58144363	58210241	NOV.15452.7	0	+	58210241	58210241	0	6	127,53,39,70,321,20,	0,216,628,780,1493,65858,
LjG1.1_chr3	58144363	58210241	NOV.15452.7	0	+	58210241	58210241	0	6	127,53,39,70,321,20,	0,216,628,780,1493,65858,
LjG1.1_chr3	58144363	58346018	NOV.15452.8	0	+	58346018	58346018	0	6	127,53,39,70,207,20,	0,216,628,780,1493,201635,
LjG1.1_chr3	58144363	58346018	NOV.15452.8	0	+	58346018	58346018	0	6	127,53,39,70,207,20,	0,216,628,780,1493,201635,
LjG1.1_chr3	58144363	58346018	NOV.15452.8	0	+	58346018	58346018	0	6	127,53,39,70,207,20,	0,216,628,780,1493,201635,
LjG1.1_chr3	58144380	58171412	NOV.15452.9	0	+	58171412	58171412	0	6	110,53,39,70,231,21,	0,199,611,763,1476,27011,
LjG1.1_chr3	59005712	59005985	NOV.15485.1	0	-	59005985	59005985	0	1	273,	0,
LjG1.1_chr3	59256014	59256425	NOV.15494.1	0	+	59256425	59256425	0	2	32,294,	0,117,
LjG1.1_chr3	59256014	59256425	NOV.15494.2	0	+	59256425	59256425	0	3	32,111,156,	0,117,255,
LjG1.1_chr3	59617989	59618283	NOV.15513.1	0	+	59618283	59618283	0	1	294,	0,
LjG1.1_chr3	59884359	59884573	NOV.15520.1	0	+	59884573	59884573	0	1	214,	0,
LjG1.1_chr3	59884359	59884573	NOV.15520.1	0	+	59884573	59884573	0	1	214,	0,
LjG1.1_chr1	23018405	23018609	NOV.1554.1	0	-	23018609	23018609	0	1	204,	0,
LjG1.1_chr3	60971135	61053392	NOV.15545.1	0	+	61053392	61053392	0	3	122,78,255,	0,63996,82002,
LjG1.1_chr1	23018862	23019453	NOV.1555.1	0	-	23019453	23019453	0	1	591,	0,
LjG1.1_chr3	61868701	61869228	NOV.15566.1	0	+	61869228	61869228	0	1	527,	0,
LjG1.1_chr3	62232410	62233159	NOV.15583.1	0	-	62233159	62233159	0	1	749,	0,
LjG1.1_chr3	62483838	62488832	NOV.15589.1	0	+	62488832	62488832	0	6	96,92,51,118,105,50,	0,200,3621,3797,4763,4944,
LjG1.1_chr3	62743756	62744316	NOV.15604.1	0	+	62744316	62744316	0	1	560,	0,
LjG1.1_chr1	23169684	23245350	NOV.1562.2	0	+	23245350	23245350	0	3	465,429,1984,	0,569,73682,
LjG1.1_chr1	23169684	23245350	NOV.1562.2	0	+	23245350	23245350	0	3	465,429,1984,	0,569,73682,
LjG1.1_chr3	64057906	64058474	NOV.15637.1	0	-	64058474	64058474	0	1	568,	0,
LjG1.1_chr3	64058948	64059223	NOV.15638.1	0	-	64059223	64059223	0	1	275,	0,
LjG1.1_chr3	64376212	64376885	NOV.15647.1	0	-	64376885	64376885	0	1	673,	0,
LjG1.1_chr1	23243110	23243708	NOV.1566.1	0	-	23243708	23243708	0	1	598,	0,
LjG1.1_chr3	65776106	65776498	NOV.15688.1	0	-	65776498	65776498	0	1	392,	0,
LjG1.1_chr3	66039322	66041440	NOV.15710.1	0	+	66041440	66041440	0	2	351,981,	0,1137,
LjG1.1_chr3	66039322	66041440	NOV.15710.2	0	+	66041440	66041440	0	2	351,595,	0,1523,
LjG1.1_chr3	66078080	66111919	NOV.15719.1	0	-	66111919	66111919	0	2	14,598,	0,33241,
[truncated: 9,907 more rows]
