# Supplementary material for: An intergenic bidirectional promoter driven novel lncRNA (LjPLR) modulates the gene expression of a late nodulin in Lotus japonicus
Source: Research Square preprint supplement (doi:10.21203/rs.3.rs-7551253/v1), 2025-10-07
Supplement: Supplementary file 2 [file 9e1918d390f92e5eb0675bce.docx]

**Title of the article**

**An intergenic bidirectional promoter driven novel lncRNA (*Lj*PLR) modulates the gene expression of a late nodulin in *Lotus japonicus***

**Name of the Journal :** Plant Molecular Biology

**Authors**

Aniruddho Das1 3, Troyee Das2, Zhumur Ghosh2 and Anirban Siddhanta1*

**Address**

**Aniruddho Das**

[**aniruddhodas.biology@ngc.ac.in**](mailto:aniruddhodas.biology@ngc.ac.in)

**Troyee Das**

[**dastroyee1993@gmail.com**](mailto:dastroyee1993@gmail.com)

**Zhumur Ghosh**

[**zhumur@jcbose.ac.in**](mailto:ghosh.jhumur@gmail.com)

**Anirban Siddhanta**

[**asbioc@caluniv.ac.in**](mailto:asbioc@caluniv.ac.in)

1Department of Biochemistry, University of Calcutta; 35 Ballygunge Circular Road, Kolkata 700019, India

2Department of Biological Sciences, Bose Institute, Unified Academic Campus,

Kolkata 700 091, West Bengal, India

3Department of Botany, Government General Degree College, Narayangarh, Rathipur, West Bengal 721437, India

*Corresponding author

| **Name of the gene** | **Accession Number** |
| --- | --- |
| *Lotus japonicus* late nodulin Nlj16 (LjNOD16) mRNA | U64964.1 |
| *Lotus japonicus* nonfunctional phosphatidylinositol transfer-like protein PLP-I (LjPLP-I) complete sequence | AF366900.1 |
| *Lotus japonicus* phosphatidylinositol transfer-like protein II (LjPLP-II) gene, complete cds | AF366901.1 |
| *Lotus japonicus* phosphatidylinositol transfer-like protein III (LjPLP-III) mRNA, complete cds | AF367433.1 |
| *Lotus japonicus* phosphatidylinositol transfer-like protein IV (LjPLP-IV) gene, complete cds | AF367434.1 |
| *Lotus japonicus* LjLb1 mRNA for leghemoglobin, complete cds | AB238217.1 |
| *Lotus japonicus* LjLb2 mRNA for leghemoglobin, complete cds | AB238218.1 |
| *Lotus japonicus* LjLb3 mRNA for leghemoglobin, complete cds | AB238219.1 |
| *Lotus japonicus* protein CYCLOPS (LOC130740245), mRNA | NM_001427824.1 |
| *Lotus japonicus* asparagine synthetase [glutamine-hydrolyzing] 1 (LOC130733971), mRNA | NM_001427823.1 |
| *Lotus japonicus* ion channel POLLUX (LOC130723105), mRNA | NM_001427795.1 |
| *Lotus japonicus* sucrose synthase (LOC130714835), transcript variant X1, mRNA | XM_057564796.1 |
| *Lotus japonicus* mRNA for Nod-facor receptor 1a (nfr1 gene) | AJ575248.1 |
| *Lotus japonicus* mRNA for Nod-facor receptor 1b (nfr1 gene) | AJ575249.1 |
| *Lotus japonicus* mRNA for Nod-factor receptor 5 (nfr5 gene) | AJ575255.1 |
| *Lotus japonicus* nin gene for nodule inception protein | AJ238956.1 |
| *Lotus japonicus* rhizobia infection receptor-like kinase 1 gene, complete cds | MN109982.1 |
| *Lotus japonicus* rhizobia infection receptor-like kinase 2 gene, mRNA | MN109983.1 |
| *Lotus japonicus* early nodulin (enod40) gene, complete cds | AF013594.2 |
| *Lotus japonicus* nodulation signaling pathway 1 protein (nsp1) gene, complete cds | EF012819.1 |
| *Lotus japonicus*mRNA for carbonic anhydrase (ca1 gene) | AJ543754.1 |
| *Lotus japonicus* nodulation signaling pathway 2 (nsp2) gene, complete cds | DQ665943.1 |

**Table S1: List of NCBI Accession Number of the genes that were used in lncTar tool analysis**
